# Supplementary material for: A probabilistic multi-omics data matching method for detecting sample errors in integrative analysis
Source: PubMed Central journal article supplement (PMC6615984; doi:10.1093/gigascience/giz080), 2019-07-09

# GigaScience

## A probabilistic multi-omics data matching method for detecting sample errors in integrative analysis --Manuscript Draft--

|                                                      |                                                                                                                                                                                                                                                                                                                                                                                                                                                                                                                                                                                                                                                                                                                                                                                                                                                                                                                                                                                                                                                                                                                                                                                                                                                                                                                                                                                                                                         |             |
|------------------------------------------------------|-----------------------------------------------------------------------------------------------------------------------------------------------------------------------------------------------------------------------------------------------------------------------------------------------------------------------------------------------------------------------------------------------------------------------------------------------------------------------------------------------------------------------------------------------------------------------------------------------------------------------------------------------------------------------------------------------------------------------------------------------------------------------------------------------------------------------------------------------------------------------------------------------------------------------------------------------------------------------------------------------------------------------------------------------------------------------------------------------------------------------------------------------------------------------------------------------------------------------------------------------------------------------------------------------------------------------------------------------------------------------------------------------------------------------------------------|-------------|
| <b>Manuscript Number:</b>                            | GIGA-D-19-00039                                                                                                                                                                                                                                                                                                                                                                                                                                                                                                                                                                                                                                                                                                                                                                                                                                                                                                                                                                                                                                                                                                                                                                                                                                                                                                                                                                                                                         |             |
| <b>Full Title:</b>                                   | A probabilistic multi-omics data matching method for detecting sample errors in integrative analysis                                                                                                                                                                                                                                                                                                                                                                                                                                                                                                                                                                                                                                                                                                                                                                                                                                                                                                                                                                                                                                                                                                                                                                                                                                                                                                                                    |             |
| <b>Article Type:</b>                                 | Research                                                                                                                                                                                                                                                                                                                                                                                                                                                                                                                                                                                                                                                                                                                                                                                                                                                                                                                                                                                                                                                                                                                                                                                                                                                                                                                                                                                                                                |             |
| <b>Funding Information:</b>                          | Foundation for the National Institutes of Health (R01-AG046170)                                                                                                                                                                                                                                                                                                                                                                                                                                                                                                                                                                                                                                                                                                                                                                                                                                                                                                                                                                                                                                                                                                                                                                                                                                                                                                                                                                         | Dr. Jun Zhu |
|                                                      | Foundation for the National Institutes of Health (U01-HG008451)                                                                                                                                                                                                                                                                                                                                                                                                                                                                                                                                                                                                                                                                                                                                                                                                                                                                                                                                                                                                                                                                                                                                                                                                                                                                                                                                                                         | Dr. Jun Zhu |
| <b>Abstract:</b>                                     | <p><b>Background</b></p> <p>Data errors, including sample swapping and mis-labeling are inevitable in the process of large-scale omics data generation. Data errors need to be identified and corrected before integrative data analyses where different types of data are merged based on the annotated labels. Data with sample errors dampen true biological signals. More importantly, data analysis with sample errors could lead to wrong scientific conclusions. We developed a robust probabilistic multi-omics data matching procedure, proMODMatcher, to curate data, identify and correct data annotation and errors in large databases.</p> <p><b>Results</b></p> <p>Application to simulated datasets suggests that proMODMatcher achieved robust statistical power even when the number of cis-associations was small and/or the number of samples was large. Application of our proMODMatcher to multi-omics data in TCGA identified sample errors in multiple cancer datasets. Our procedure was not only able to identify sample labeling errors but also to unambiguously identify the source of the errors. Our results demonstrate that these errors should be identified and corrected before integrative analysis.</p> <p><b>Conclusions</b></p> <p>Our results indicate that sample labeling errors were common in large multi-omics datasets. These errors should be corrected before integrative analysis.</p> |             |
| <b>Corresponding Author:</b>                         | Jun Zhu<br>Icahn School of Medicine at Mount Sinai<br>UNITED STATES                                                                                                                                                                                                                                                                                                                                                                                                                                                                                                                                                                                                                                                                                                                                                                                                                                                                                                                                                                                                                                                                                                                                                                                                                                                                                                                                                                     |             |
| <b>Corresponding Author Secondary Information:</b>   |                                                                                                                                                                                                                                                                                                                                                                                                                                                                                                                                                                                                                                                                                                                                                                                                                                                                                                                                                                                                                                                                                                                                                                                                                                                                                                                                                                                                                                         |             |
| <b>Corresponding Author's Institution:</b>           | Icahn School of Medicine at Mount Sinai                                                                                                                                                                                                                                                                                                                                                                                                                                                                                                                                                                                                                                                                                                                                                                                                                                                                                                                                                                                                                                                                                                                                                                                                                                                                                                                                                                                                 |             |
| <b>Corresponding Author's Secondary Institution:</b> |                                                                                                                                                                                                                                                                                                                                                                                                                                                                                                                                                                                                                                                                                                                                                                                                                                                                                                                                                                                                                                                                                                                                                                                                                                                                                                                                                                                                                                         |             |
| <b>First Author:</b>                                 | Eunjee Lee                                                                                                                                                                                                                                                                                                                                                                                                                                                                                                                                                                                                                                                                                                                                                                                                                                                                                                                                                                                                                                                                                                                                                                                                                                                                                                                                                                                                                              |             |
| <b>First Author Secondary Information:</b>           |                                                                                                                                                                                                                                                                                                                                                                                                                                                                                                                                                                                                                                                                                                                                                                                                                                                                                                                                                                                                                                                                                                                                                                                                                                                                                                                                                                                                                                         |             |
| <b>Order of Authors:</b>                             | Eunjee Lee                                                                                                                                                                                                                                                                                                                                                                                                                                                                                                                                                                                                                                                                                                                                                                                                                                                                                                                                                                                                                                                                                                                                                                                                                                                                                                                                                                                                                              |             |
|                                                      | Seungyeul Yoo                                                                                                                                                                                                                                                                                                                                                                                                                                                                                                                                                                                                                                                                                                                                                                                                                                                                                                                                                                                                                                                                                                                                                                                                                                                                                                                                                                                                                           |             |
|                                                      | Wenhui Wang                                                                                                                                                                                                                                                                                                                                                                                                                                                                                                                                                                                                                                                                                                                                                                                                                                                                                                                                                                                                                                                                                                                                                                                                                                                                                                                                                                                                                             |             |
|                                                      | Zhidong Tu                                                                                                                                                                                                                                                                                                                                                                                                                                                                                                                                                                                                                                                                                                                                                                                                                                                                                                                                                                                                                                                                                                                                                                                                                                                                                                                                                                                                                              |             |

|                                                                                                                                                                                                                                                                                                                                                                                                                                                                                                                                     |                 |
|-------------------------------------------------------------------------------------------------------------------------------------------------------------------------------------------------------------------------------------------------------------------------------------------------------------------------------------------------------------------------------------------------------------------------------------------------------------------------------------------------------------------------------------|-----------------|
|                                                                                                                                                                                                                                                                                                                                                                                                                                                                                                                                     | Jun Zhu         |
| <b>Order of Authors Secondary Information:</b>                                                                                                                                                                                                                                                                                                                                                                                                                                                                                      |                 |
| <b>Additional Information:</b>                                                                                                                                                                                                                                                                                                                                                                                                                                                                                                      |                 |
| <b>Question</b>                                                                                                                                                                                                                                                                                                                                                                                                                                                                                                                     | <b>Response</b> |
| Are you submitting this manuscript to a special series or article collection?                                                                                                                                                                                                                                                                                                                                                                                                                                                       | No              |
| <p><b>Experimental design and statistics</b></p> <p>Full details of the experimental design and statistical methods used should be given in the Methods section, as detailed in our <a href="#">Minimum Standards Reporting Checklist</a>. Information essential to interpreting the data presented should be made available in the figure legends.</p> <p>Have you included all the information requested in your manuscript?</p>                                                                                                  | Yes             |
| <p><b>Resources</b></p> <p>A description of all resources used, including antibodies, cell lines, animals and software tools, with enough information to allow them to be uniquely identified, should be included in the Methods section. Authors are strongly encouraged to cite <a href="#">Research Resource Identifiers</a> (RRIDs) for antibodies, model organisms and tools, where possible.</p> <p>Have you included the information requested as detailed in our <a href="#">Minimum Standards Reporting Checklist</a>?</p> | Yes             |
| <p><b>Availability of data and materials</b></p> <p>All datasets and code on which the conclusions of the paper rely must be either included in your submission or deposited in <a href="#">publicly available repositories</a> (where available and ethically appropriate), referencing such data using a unique identifier in the references and in</p>                                                                                                                                                                           | Yes             |

the “Availability of Data and Materials” section of your manuscript.

Have you have met the above requirement as detailed in our [Minimum Standards Reporting Checklist?](#)

[Click here to view linked References](#)

1  
2  
3  
4  
5  
6  
7  
8  
9  
10  
11  
12  
13  
14  
15  
16  
17  
18  
19  
20  
21  
22  
23  
24  
25  
26  
27  
28  
29  
30  
31  
32  
33  
34  
35  
36  
37  
38  
39  
40  
41  
42  
43  
44  
45  
46  
47  
48  
49  
50  
51  
52  
53  
54  
55  
56  
57  
58  
59  
60  
61  
62  
63  
64  
65

1 **A probabilistic multi-omics data matching method for detecting sample errors in**  
2 **integrative analysis**

3  
4 Eunjee Lee<sup>1,2,3</sup>, Seungyeul Yoo<sup>1,2</sup>, Wenhui Wang<sup>1,2</sup>, Zhidong Tu<sup>1,2</sup> and Jun Zhu<sup>1,2,3,4,\*</sup>

5  
6 <sup>1</sup>Department of Genetics and Genomic Sciences; <sup>2</sup>Icahn Institute of Genomics and Multiscale  
7 Biology, Icahn School of Medicine at Mount Sinai, New York, NY 10029; <sup>3</sup>Sema4, a Mount Sinai  
8 venture, Stamford, CT, USA; <sup>4</sup>The Tisch Cancer Institute, Icahn School of Medicine at Mount  
9 Sinai, New York, NY 10029;

10 \*All corresponds should be addressed to Dr. Jun Zhu (jun.zhu@mssm.edu)

11  
12 Eunjee Lee (eunjee.lee@mssm.edu)

13 Seungyeul Yoo (seungyeul.yoo@mssm.edu)

14 Wenhui Wang (wenhui.wang@mssm.edu)

15 Zhidong Tu (zhidong.tu@mssm.edu)

16 Jun zhu (jun.zhu@mssm.edu)

1  
2  
3  
4  
5  
6  
7  
8  
9  
10  
11  
12  
13  
14  
15  
16  
17  
18  
19  
20  
21  
22  
23  
24  
25  
26  
27  
28  
29  
30  
31  
32  
33  
34  
35  
36  
37  
38  
39  
40  
41  
42  
43  
44  
45  
46  
47  
48  
49  
50  
51  
52  
53  
54  
55  
56  
57  
58  
59  
60  
61  
62  
63  
64  
65

24 **Abstract**

25 **Background:** Data errors, including sample swapping and mis-labeling are inevitable in the  
26 process of large-scale omics data generation. Data errors need to be identified and corrected  
27 before integrative data analyses where different types of data are merged based on the  
28 annotated labels. Data with labeling errors dampen true biological signals. More importantly,  
29 data analysis with sample errors could lead to wrong scientific conclusions. We developed a  
30 robust *probabilistic* multi-omics data matching procedure, *proMODMatcher*, to curate data,  
31 identify and correct data annotation and errors in large databases.

32 **Results:** Application to simulated datasets suggests that *proMODMatcher* achieved robust  
33 statistical power even when the number of cis-associations was small and/or the number of  
34 samples was large. Application of our *proMODMatcher* to multi-omics data in TCGA identified  
35 sample errors in multiple cancer datasets. Our procedure was not only able to identify sample  
36 labeling errors but also to unambiguously identify the source of the errors. Our results  
37 demonstrate that these errors should be identified and corrected before integrative analysis.

38 **Conclusions:** Our results indicate that sample labeling errors were common in large multi-  
39 omics datasets. These errors should be corrected before integrative analysis.

42 **Keywords:** data error, omics data integration, and data curation

## 47 **Background**

48 With advances in high throughput technologies in the past two decades, diverse types of omics  
49 data at multiple layers of regulation have been generated to survey complex human diseases  
50 [1-3], which arise from dysregulations of interplays among these multiple layers of regulations  
51 including genetics, epigenetics, transcriptomics, metabolomics, glycomics, and proteomics.  
52 Therefore, integration of multi-omics data at multiple layers of regulation is essential to derive a  
53 holistic view of molecular mechanisms underlying complex human disease. Previous studies  
54 have shown that simultaneously considering diverse types of biological data result in more  
55 complete understandings of biological systems [4-6].

56 Recently, many large projects, such as The Cancer Genome Atlas (TCGA), have  
57 generated diverse types of omics data for public use. However, data errors, including sample  
58 swapping, mis-labeling, and improper data entry are almost inevitable in the process of large-  
59 scale data generation and management. Westra *et al.* [7] showed that there is about 20% of  
60 mis-matched samples between genotype and gene expression data. Yoo *et al.* [8] demonstrated  
61 that sample labeling errors occurred in almost every database examined. Also, there are studies  
62 to identify cross-individual contamination in next-generation sequencing data from TCGA  
63 samples [9, 10].

64 Identifying and ultimately correcting these sample errors are critical for statistical data  
65 analysis, especially for integrative analysis. Data errors need to be identified and corrected  
66 before extensive efforts being devoted to data analysis. Analyzing data with sample errors is a  
67 waste of limited public resources. More importantly, data analysis with sample errors could lead  
68 to wrong scientific conclusions. Furthermore, sample errors have more significant effect on  
69 integrative data analysis where different types of data are merged based on the annotated  
70 labels. Some types of sample errors can be detected during data quality control (QC) on each

1  
2  
3  
4  
5  
6  
7  
8  
9  
10  
11  
12  
13  
14  
15  
16  
17  
18  
19  
20  
21  
22  
23  
24  
25  
26  
27  
28  
29  
30  
31  
32  
33  
34  
35  
36  
37  
38  
39  
40  
41  
42  
43  
44  
45  
46  
47  
48  
49  
50  
51  
52  
53  
54  
55  
56  
57  
58  
59  
60  
61  
62  
63  
64  
65

71 individual type of data, whereas sample errors including sample swapping, or mis-labeling are  
72 elusive to be detected by data QC on individual type of data alone.

73 Previously, we developed sample mapping procedure called MODMatcher (Multi-Omics  
74 Data matcher) [8], which is not only able to identify mis-matched omics profile pairs, but also to  
75 properly map them to correct samples based on other omics data. We demonstrated that the  
76 statistical power to identify biological signals increases after database cleaning by applying the  
77 MODMatcher procedure to multiple large-scale public multi-omics datasets from LGRC and  
78 TCGA. The power of MODMatcher depends on the number of intrinsic biological cis-  
79 associations that can be identified. The power of MODMatcher decreases when the number of  
80 cis-associations between two omics profiles is small. However, in some cases (a few examples  
81 are detailed in the Results), the number of possible intrinsic biological cis-associations is small,  
82 new methods are needed for these types of applications.

83 In this study, we extended MODMatcher and developed a robust *probabilistic* multi-  
84 omics data matching procedure, *proMODMatcher*, to curate data, identify and unambiguously  
85 correct data annotation and metadata attribute errors in large databases. First, we applied the  
86 *proMODMatcher* to simulated datasets to assess the statistical power of our procedure. Results  
87 suggest that *proMODMatcher* achieved robust statistical power even when the number of cis-  
88 associations was small and/or the number of samples was large. Next, we applied the  
89 *proMODMatcher* procedure to multiple large-scale publicly available multi-omics datasets from  
90 TCGA, and in particular, focused on the omics profiles that have small numbers of intrinsic cis-  
91 associations including miRNA expression and Reverse Phase Protein Array (RPPA). Our  
92 results indicate that sample labeling errors were common in large multi-omics datasets. These  
93 errors should be corrected before integrative analysis.

94

## **Data Description**

### **TCGA datasets**

For the TCGA breast invasive carcinoma (BRCA) dataset, level 3 data of gene expression, DNA methylation, miRNA expression and CNV was downloaded from Genomic Data Commons (GDC) data portal (<https://portal.gdc.cancer.gov/>). For gene expression profiles, IlluminaHiSeq\_RNASeqV2 and AgilentG4502A platform were used. Illumina HumanMethylation27 (HM27) and HumanMethylation450 (HM450) Beadchip were used for DNA methylation bisulfide sequencing. IlluminaHiSeq\_miRNASeq and IlluminaGA\_miRNASeq platforms were used to profile miRNA expression. Affymetrix Genome-Wide Human SNP Array 6.0 was used for copy number variation. The protein expression levels were measured in Reverse Phase Protein Array (RPPA), and downloaded. Each of level 3 profiles was reformatted for matrix of row with gene (or probes) and column with barcodes of samples. For methylation profiles and CNV, the probes or segments were mapped to hg19 refGene. Different profiles were initially matched according to their barcodes.

For other types of cancers in TCGA, we downloaded gene expression, miRNA expression, CNV, DNA methylation, and RPPA data from firehose database <https://gdac.broadinstitute.org/>. For RPPA data, we filtered genes with more than 25% of samples with not-assigned measurements.

### **Simulation study**

Simulated data sets for testing alignment between a pair of omics profiles were generated. Given a set of  $N$  *cis*-associations and each of correlation coefficient  $r_n$ , we can simulate omics profiles  $Y$  based omics profiles  $X$  for  $M$  samples as following:  $X_i = N(0,1)$  is a standard normal



1  
2  
3  
4  
5  
6 118 distribution, and  $\gamma_i = \frac{r_n}{\sqrt{1-r_n^2}}X_i + \epsilon$ , where  $\epsilon$  is standard normal distribution,  $N(0,1)$ . For each  $N$   
7  
8  
9 119 and  $M$  combination, we simulated  $N$  significant sets with  $r_n$  drawn from a truncated normal  
10  
11 120 distribution with a cutoff value corresponding to correlation coefficients q-value  $< 0.05$ , as well  
12  
13  
14 121 as 2000 sets of random  $r_n$  drawn from a normal distribution. We considered  $N$  significant *cis*-  
15  
16 122 associations from 75 through 1000, and  $M$  samples from 100 through 1000. The simulated data  
17  
18 123 with label error were generated by permuting the labels of one type of data. We considered 0, 2,  
19  
20  
21 124 .. 10% label error rates. We measured sensitivity (i.e. recall)  $= \frac{\#truly\ aligned\ pairs}{\#simulated\ pairs}$ , specificity (i.e.  
22  
23 125 precision)  $= \frac{\#truly\ aligned\ pairs}{\#align\ pairs}$ , false positive rate (FPR)=1-specificity, and F measures ( $= 2 \times$   
24  
25  
26 126  $\frac{precision \times recall}{precision + recall}$ ) for assessment. Additionally, because a pair of omics profiles mostly has  
27  
28  
29 127 unbalanced samples, we mimics this by adding 10% of  $M$  samples for type A and type B omics  
30  
31 128 profiles.

## 32 33 129 34 35 36 130 **Analyses**

### 37 38 39 131 **Overview of proMODMatcher procedure**

40  
41 132 *proMODMatcher* followed the general framework of multi-omics data matching of the previous  
42  
43 133 study [8]. Two types of data (or profiles) (i.e. Type A and Type B in **Figure 1**) were matched  
44  
45 134 based on their *cis*-associations. Samples were initially matched based on annotated sample ID  
46  
47  
48 135 and potential *cis*-associations (**Figure 1A**). The significant *cis*-associations from two different  
49  
50 136 data types were identified by the Spearman correlations (**Figure 1B**). The data for each *cis*-  
51  
52 137 association was normal rank-transformed (**Figure 1B**). The profile similarity between the two  
53  
54  
55 138 types of data  $S(A_i, B_j)$  is defined as the correlation between profile  $i$  of type A and profile  $j$  of  
56  
57 139 type B (**Figure 1C**). The probability of a match between profile  $i$  of type A and profile  $j$  of type B

1  
2  
3  
4  
5  
6  
7  
8  
9  
10  
11  
12  
13  
14  
15  
16  
17  
18  
19  
20  
21  
22  
23  
24  
25  
26  
27  
28  
29  
30  
31  
32  
33  
34  
35  
36  
37  
38  
39  
40  
41  
42  
43  
44  
45  
46  
47  
48  
49  
50  
51  
52  
53  
54  
55  
56  
57  
58  
59  
60  
61  
62  
63  
64  
65

is estimated by evaluating a similarity score in a bivariate normal distribution (**Figure 1D**).  
Based on probability of a match, *proMODMatcher* determines self- or cross-alignments for each  
match. First, profile pairs matched by annotated sample IDs were checked whether their  
similarity scores were high (**Figure 1D**) to be annotated as “self-aligned”. If not, additional steps  
were applied to find any potential matches among other unmatched profiles (**Figure 1E**). The  
matched profile pairs were then used to update significant *cis*-associations. We iteratively  
refined profile alignment and rounds of alignments were repeated until there were no further  
updates (**Figure 1F**).

### **Simulation studies**

Numbers of significant *cis*-associations and samples are two important deterministic factors of  
similarity scores as well as the accuracy of omics profile alignment results. To investigate the  
effect of numbers of samples and *cis*-associations, we simulated data sets with different  
numbers of samples and significant *cis*-associations and applied MODMatcher and  
*proMODMatcher* to the simulated data sets. For MODMatcher, when the number of *cis*-  
associations was >200, almost all profile pairs could be aligned at high accuracy (false positive  
rate vs. sensitivity) (**Figure 2**). The similarity scores of matched pairs based on a low number of  
*cis*-associations were more variable resulting in lower accuracies (**Supplementary Figure S1**).  
This result indicates that the MODMatcher can be applied to align the omics profile pairs with  
>200 *cis*-associations, such as methylation-mRNA profiles with over 7000 intrinsic *cis*-  
associations and mRNA-CNV profiles with over 10,000 intrinsic *cis*-associations [8]. On the  
other hand, when the number of *cis*-associations was around 200 or below, the accuracy of  
sample alignments dropped as the number of samples increased (**Figure 2**). When aligning  
gene expression profiles with miRNA or RPPA profiles, the number of candidate intrinsic *cis*-

1  
2  
3  
4  
5  
6 164 associations was small (detailed below). Thus, MODMatcher was not powered to accurately  
7  
8 165 align these types of profile pairs.  
9

10 166 The *pro*MODMatcher was applied to the same simulated datasets and was able to  
11  
12 167 achieve high sensitivities and low FPRs across a wide range of numbers of *cis*-associations and  
13  
14 168 samples (**Figure 3A**). When compared with MODMatcher's results, *pro*MODMatcher resulted in  
15  
16  
17 169 better accuracies (F measure in **Figure 3B**), sensitivities, and specificities (**Figure 3C**).  
18

19 170 We further investigated their performances when there were labeling errors. Datasets  
20  
21 171 with sample labeling errors (i.e. 4% and 6%) were simulated by randomly assigning some  
22  
23 172 samples' labels, then *pro*MODMatcher and MODMatcher were applied to identify aligned profile  
24  
25 173 pairs. As expected, when a larger number of *cis*-associations was available, *pro*MODMatcher  
26  
27  
28 174 achieved a higher sensitivity and lower FPR (**Figure 3A**). Across all tested combinations of  
29  
30 175 numbers of *cis*-associations and samples, *pro*MODMatcher resulted in >99% accuracy with 4-  
31  
32 176 6% input labeling error rates, consistently outperformed MODMatcher (**Figure 3B**). When  
33  
34  
35 177 compared with MODMatcher in terms of sensitivity and specificity, *pro*MODMatcher achieved  
36  
37 178 better specificities in all cases and better sensitivities in most cases (**Figure 3C**). MODMatcher  
38  
39 179 achieved a better sensitivity but worse specificity than *pro*MODMatcher when only a low number  
40  
41 180 of *cis*-associations (i.e. 75) was available (**Figure 3C**). These simulation results suggest that  
42  
43 181 *pro*MODMatcher is applicable for identifying and correcting labeling errors even when the  
44  
45  
46 182 number of *cis*-associations is small such as paring mRNA-miRNA or mRNA-RPPA profiles.  
47  
48 183

#### 50 184 **Application to TCGA breast cancer dataset: mRNA and miRNA profiles**

51  
52 185 Multiple omics data, including profiles of mRNA, miRNA, protein, DNA methylation, and CNV,  
53  
54 186 were available in TCGA. The *pro*MODMatcher was applied to align methylation and/or CNV  
55  
56  
57 187 profiles to mRNA profiles similar to what we did previously [8]. Here we focused on alignment of  
58  
59  
60  
61  
62  
63  
64  
65

1  
2  
3  
4  
5  
6 188 miRNA expression profiles to mRNA expression data because the number of candidate intrinsic  
7  
8 189 cis-associations between miRNA and mRNA profiles was small. We used the TCGA breast  
9  
10 190 cancer (BRCA) dataset as an example to illustrate the profile alignment results in detail. There  
11  
12 191 were mRNA expression profiles based on two different platforms, Agilent microarray and  
13  
14 192 RNAseq technology. There were 519 tumor samples with both mRNA expression measured in  
15  
16 193 Agilent microarray and miRNA expression measured by small-RNA sequencing method, and  
17  
18 194 1041 tumor samples with both mRNA expression measured in RNAseq and miRNA measured  
19  
20 195 by small-RNA sequencing method. A small portion of miRNAs are embedded in gene regions  
21  
22 196 (i.e. host genes) and frequently co-transcribed with host genes [11, 12] (**Figure 4A**), embedded  
23  
24 197 miRNA-host gene pairs were candidate intrinsic *cis*-associations. Total 1222 miRNAs were  
25  
26 198 profiled, and 227 and 271 of them were mapped to host genes, for Agilent microarray and  
27  
28 199 RNAseq data, respectively. Among them, 138 out of 227 and 175 out of 271 miRNA-host genes  
29  
30 200 pairs were significantly associated with each other at  $q\text{-value} < 0.05$ , for Agilent microarray and  
31  
32 201 RNAseq data, respectively. For example, miR-452 located in the gene body of *GABRE*, its  
33  
34 202 expression was highly associated with mRNA expression of *GABRE* (**Figure 4B**). Based on  
35  
36 203 these intrinsic *cis*-associations between expression levels of miRNAs and host genes, we  
37  
38 204 aligned the two types of omics data.  
39  
40  
41  
42  
43  
44

#### 45 205 46 206 *Aligning gene expression profiles by RNAseq and miRNAseq data*

47  
48 207 The similarity scores of self-aligned gene expression-miRNA expression profiles were much  
49  
50 208 higher than other possible pairings in general (**Figure 4C**): 898 out of 1041 (86.2%) the  
51  
52 209 similarity scores for self-self RNAseq-miRNAseq profiles were ranked at top 2%. For example,  
53  
54 210 the similarity score for the self-aligned profiles of TCGA-D8-A1JH-01 was top ranked among  
55  
56 211 other possible pairings (**Figure 4D**). Total 143 miRNA profiles that were not matched to the  
57  
58  
59  
60  
61  
62  
63  
64  
65

corresponding mRNA profiles of the same sample names based on MODMatcher (e.g. TCGA-B6-A0X7-01 shown in **Figure 4E**). Among profile pairs that were not self-aligned, 5 for RNAseq profiles were cross-aligned to other samples' miRNA profiles (**Supplementary Table S1**). The rate of alignment was low compared to alignments of other types of profile pairs. For example, >99% profile pairs of DNA methylation and mRNA expression profiles were aligned for the TCGA BRCA data set.

**Table 1.** Application of *proMODMatcher* to mRNA and miRNA profiles of TCGA BRCA data.

| Data types | Data types | # samples <sup>1</sup> | # cis pair <sup>2</sup> | # of self-aligned | # of cross | Cross-aligned pairs    | Self-aligned in RNA-CNV <sup>3</sup> | Cross-aligned pairs    |
|------------|------------|------------------------|-------------------------|-------------------|------------|------------------------|--------------------------------------|------------------------|
| Type1      | Type 2     |                        |                         |                   |            | Type 1                 |                                      | Type 2                 |
| RNAseq     | miRNAseq   | 1041                   | 175/215                 | 989 (95.0%)       | 1          | <b>TCGA-BH-A0BZ-01</b> | Y                                    | <b>TCGA-E2-A15K-01</b> |
| Agilent    | miRNAseq   | 519                    | 138/178                 | 466 (89.7%)       | 9          | TCGA-A8-A07U-01        | Y                                    | TCGA-A2-A3XY-01        |
|            |            |                        |                         |                   |            | TCGA-BH-A0H9-01        | Y                                    | TCGA-EW-A423-01        |
|            |            |                        |                         |                   |            | TCGA-AO-A128-01        | Y                                    | TCGA-BH-A18V-06        |
|            |            |                        |                         |                   |            | <b>TCGA-A1-A0SD-01</b> | No: TCGA-BH-A0EI-01                  | <b>TCGA-BH-A0EI-01</b> |
|            |            |                        |                         |                   |            | <u>TCGA-BH-A18K-01</u> | No: TCGA-BH-A18T-01                  | <u>TCGA-BH-A18T-01</u> |
|            |            |                        |                         |                   |            | <u>TCGA-BH-A18T-01</u> | No: TCGA-BH-A18K-01                  | <u>TCGA-BH-A18K-01</u> |
|            |            |                        |                         |                   |            | <b>TCGA-BH-A0BZ-01</b> | Y                                    | <b>TCGA-E2-A15K-01</b> |
|            |            |                        |                         |                   |            | <b>TCGA-BH-A0BS-01</b> | No: TCGA-BH-A0BT-01                  | <b>TCGA-BH-A0BT-01</b> |
|            |            |                        |                         |                   |            | TCGA-AR-A0U0-01        | Y                                    | TCGA-AR-A256-01        |

The **bold** indicates cross-alignments supported by other data and underlines indicates sample swaps.

<sup>1</sup>The number of common sample with both type1 and type2 profiles.

<sup>2</sup>The number of significant cis-pairs at q-value <0.05 at final iteration and the number of cis-pairs investigated. We investigated only cis-pairs that have more than 25% of samples with expressed RPPA or mRNA.

<sup>3</sup>Indicate the RNA sample of cross-aligned pairs are self-aligned or not in alignment between RNA profile (Agilent array or RNAseq) and CNV profile. The aligned pairs are also shown if there is a cross-aligned sample.

Applying *proMODMatcher* to TCGA BRCA RNAseq-miRNAseq datasets, the probabilities of similarity scores (before multiplying prior probability) for self-aligned RNAseq-miRNA profiles were much higher than other possible pairs in general (**Figure 4F**). An example of similarity scores of a self-aligned RNAseq-miRNA profile pair and other possible pairs is shown in **Figure 4G**. There were multiple self-self pairs with low probabilities for self-alignment (**Figure 4F** and **Figure 4H**), suggesting potential labeling errors in RNAseq and/or miRNA

1  
2  
3  
4  
5  
6  
7  
8  
9  
10  
11  
12  
13  
14  
15  
16  
17  
18  
19  
20  
21  
22  
23  
24  
25  
26  
27  
28  
29  
30  
31  
32  
33  
34  
35  
36  
37  
38  
39  
40  
41  
42  
43  
44  
45  
46  
47  
48  
49  
50  
51  
52  
53  
54  
55  
56  
57  
58  
59  
60  
61  
62  
63  
64  
65

231 profiles. Overall, 989 out of 1041 candidate matching pairs (i.e. 95.0%) (**Table 1**) were self-  
232 aligned compared to 86.2% for MODMatcher. Among profiles that were not self-aligned, 1  
233 profile pair (i.e. TCGA-BH-A0BZ-01 and TCGA-E2-A15K-01 ) was cross-aligned to each other  
234 (**Table 1**).

235 Comparing MODMatcher and *pro*MODMatcher, the *pro*MODMatcher identified additional  
236 91 self-aligned profile pairs that were missed by MODMatcher. For example, the similarity score  
237 of self-alignment for TCGA-AO-A0JF-01 was among the highest one when the miRNA profile  
238 compared to RNAseq profiles of other samples (y-axis in **Figure 5A**). However, the RNAseq  
239 profile of TCGA-AO-A0JF-01 was highly similar with multiple miRNA profiles of other samples  
240 (x-axis in **Figure 5A**). As a result, the rank-based MODMatcher rejected the self-alignment, but  
241 *pro*MODMatcher identified self-alignment for TCGA-AO-A0JF-01 with p-value of  $7.3 \times 10^{-6}$ .

242 One cross-aligned pair, RNAseq of TCGA-BH-A0BZ-01 and miRNA of TCGA-E2-A15K-  
243 01, was identified by both *pro*MODMatcher and MODMatcher. The similarity score of the cross-  
244 aligned pair is shown in **Figure 5B**. The similarity scores of self-self alignments were low (red  
245 dots in **Figure 5B**); on the other hand, the similarity score of the cross-aligned pair was  
246 significantly higher compared to other similarity scores (**Figure 5B**), indicating high confidence  
247 of cross-alignment. Furthermore, we compared significance levels of *cis*-associations based on  
248 profile pairs aligned by MODMatcher and *pro*MODMatcher. They were comparable in general  
249 with a few highly significant *cis*-associations more significant based on *pro*MODMatcher  
250 compared to MODMatcher (**Figure 5C**).

### 251 *Aligning gene expression profiles by Agilent microarray and miRNAseq data*

252 MODMatcher and *pro*MODMatcher were also applied to align mRNA expression profiles based  
253 Agilent microarray and miRNA profiles. There were 138 *cis*-associations identified based on

1  
2  
3  
4  
5  
6  
7  
8  
9  
10  
11  
12  
13  
14  
15  
16  
17  
18  
19  
20  
21  
22  
23  
24  
25  
26  
27  
28  
29  
30  
31  
32  
33  
34  
35  
36  
37  
38  
39  
40  
41  
42  
43  
44  
45  
46  
47  
48  
49  
50  
51  
52  
53  
54  
55  
56  
57  
58  
59  
60  
61  
62  
63  
64  
65

Agilent microarray data and miRNAseq data. Based on these cis-associations, 87% of candidate profile pairs were identified as self-aligned by MODMatcher (**Supplementary Table S1**) while 89.7% of candidate profile pairs were self-aligned by *pro*MODMatcher (**Table 1**).

Among profiles that were not self-aligned, 9 cross-aligned profile pairs were identified by *pro*MODMatcher (**Table 1, Supplementary Figure S2B**). These cross-aligned pairs included a possible swap between TCGA-BH-A18K-01 and TCGA-BH-A18I-01 (**Figure 6A** and **Table 1**). To determine the source of labeling errors (due to mRNA Agilent profiles or miRNA profiles) other omics profiles were compared with each other and results were summarized into a patient-centric view (**Figure 6B**). For patient/sample TCGA-BH-A18K, the RNAseq and miRNAseq profiles were self-aligned and the RNAseq and CNV profiles were self-aligned as well (**Figure 6B**). Similarly, for patient/sample TCGA-BH-A18I, the RNAseq profile was self-aligned to the miRNA, CNV, and DNA methylation profiles as well as the RPPA profile (detailed below) (**Figure 6B**). The cross-alignments of TCGA-BH-A18K-01 and TCGA-BH-A18T-01 mRNA Agilent profiles with their miRNA profiles (**Figure 6B**) indicate sample swapping occurred in mRNA Agilent array profiles. After swapping the corresponding mRNA Agilent array profiles, multiple-omics profiles of TCGA-BH-A18K and TCGA-BH-A18T were aligned to each other consistently (**Figure 6C**). Our previous study based on pairwise profile alignments of gene expression, DNA methylation and CNV also identified the sample swaps in mRNA Agilent array profiles of TCGA-BH-A18K-01 and TCGA-BH-A18T-01 [8] (**Figure 6B-C**). In addition, *pro*MODMatch identified a cross-alignment of the mRNA Agilent array profile of TCGA-A1-A0SD-01 and the miRNA profile of TCGA-BH-A0EI-01 (**Table 1, Figure 6D**), consistent with potential sample swaps of mRNA Agilent array profiles of TCGA-A1-A0SD-01 and TCGA-BH-A0EI-01 when alignments of other omics profiles were included. Similarly, the cross-alignment between the Agilent array profile of TCGA-BH-A0BS-01 and the miRNA profile of TCGA-BH-

1  
2  
3  
4  
5  
6  
7  
8  
9  
10  
11  
12  
13  
14  
15  
16  
17  
18  
19  
20  
21  
22  
23  
24  
25  
26  
27  
28  
29  
30  
31  
32  
33  
34  
35  
36  
37  
38  
39  
40  
41  
42  
43  
44  
45  
46  
47  
48  
49  
50  
51  
52  
53  
54  
55  
56  
57  
58  
59  
60  
61  
62  
63  
64  
65

279 A0BI-01 was likely a result of a swap between the Agilent array profiles of the two samples  
280 when adding all available omics data into the comparison (**Figure 6E**).

281 The *proMODMatcher* identified a cross-aligned pair between the mRNA Agilent array  
282 profile of TCGA-BH-A0BZ-01 and the miRNA profile of TCGA-E2-A15K-01(See **Table 1, Figure**  
283 **6F**). The miRNA profile of TCGA-E2-A15K-01 was also cross-aligned to the mRNAseq profile of  
284 TCGA-BH-A0BZ-01 (**Table 1, Figure 5B**). When including alignments of other omics profiles in  
285 a patient-centric view (**Figure 6F**), the result suggests that there was a labeling error of the  
286 miRNA profile of TCGA-E2-A15K-01.

287 These results together suggest that *proMODMatcher* with 138 *cis*-associations can  
288 accurately identify sample labeling errors and unambiguously correct labeling errors.

### 290 Application to TCGA breast cancer dataset: mRNA and RPPA profiles

291 There were 424 tumor samples with both mRNA expression measured in Agilent microarray and  
292 RPPA data, and 856 tumor samples with both mRNA expression measured in RNAseq and  
293 RPPA data. Total 145 proteins were mapped to unique mRNA transcripts, and 97 and 104 of  
294 protein-mRNA pairs whose protein abundance was significantly correlated ( $q < 0.05$ ) with the  
295 corresponding mRNA's expression level were defined as significant *cis*-associations based on  
296 Agilent microarray and RNAseq data, respectively (**Figure 7A** and **Table 2**). And 84.9% and  
297 80.2% of candidate profile pairs were identified as self-aligned by *proMODMatcher* (**Table 2**).  
298 Examples of similarity scores of a self-aligned RNAseq-miRNA profile pair (**Figure 7B**) and a  
299 cross-alignment (**Figure 7C, Supplementary Figure S4**) comparing with other possible pairs  
300 are shown. The cross-aligned pair of the mRNA Agilent microarray profile TCGA-AR-A1AV-01  
301 and the RPPA profile of TCGA-AR-A1AW-01 data was identified (**Figure 7D**), consistent with  
302 labeling errors in the mRNA Agilent array data (**Figure 7D**). The potential cross-alignment



between the mRNA Agilent microarray profile TCGA-AR-A1AW-01 and the RPPA profile of TCGA-AR-A1AW-01 data was not identified (**Figure 7D**), suggesting *proMODMatcher*'s sensitivity is limited when the number of *cis*-associations is around 100. A large number of non-random missing data in RPPA data (**Supplementary Figure S4**) may also contribute to low sensitivity of the method.

**Table 2.** Application of *proMODMatcher* to mRNA and RPPA profiles of TCGA BRCA data

| Data types | Data types | # samples <sup>1</sup> | # cis pair <sup>2</sup> | # of self-aligned | # of cross | Cross-aligned pairs    | Self-aligned in RNA-CNV <sup>3</sup> | Cross-aligned pairs    |
|------------|------------|------------------------|-------------------------|-------------------|------------|------------------------|--------------------------------------|------------------------|
| Type1      | Type 2     |                        |                         |                   |            | Type 1                 |                                      | Type 2                 |
| RNAseq     | RPPA       | 856                    | 104/151                 | 687 (80.2%)       | 1          | TCGA-A7-A56D-01        | Y                                    | TCGA-W8-A86G-01        |
| Agilent    | RPPA       | 424                    | 97/145                  | 360 (84.9%)       | 11         | TCGA-BH-A0DS-01        | No :TCGA-BH-A0BA-01                  | TCGA-E2-A1IL-01        |
|            |            |                        |                         |                   |            | TCGA-E2-A10C-01        | Y                                    | TCGA-LL-A5YN-01        |
|            |            |                        |                         |                   |            | TCGA-E2-A1B0-01        | Y                                    | TCGA-D8-A1JK-01        |
|            |            |                        |                         |                   |            | <b>TCGA-AR-A1AV-01</b> | <b>No: TCGA-AR-A1AW-01</b>           | <b>TCGA-AR-A1AW-01</b> |
|            |            |                        |                         |                   |            | TCGA-E2-A1B6-01        | No:TCGA-E2-A1B5-01                   | TCGA-AR-A255-01        |
|            |            |                        |                         |                   |            | TCGA-A8-A07J-01        | Y                                    | TCGA-D8-A1JU-01        |
|            |            |                        |                         |                   |            | TCGA-A8-A0AB-01        | Y                                    | TCGA-EW-A1J3-01        |
|            |            |                        |                         |                   |            | TCGA-AN-A04C-01        | Y                                    | TCGA-E9-A1N9-01        |
|            |            |                        |                         |                   |            | TCGA-E2-A105-01        | Y                                    | TCGA-C8-A1HO-01        |
|            |            |                        |                         |                   |            | TCGA-AN-A0XL-01        | Y                                    | TCGA-D8-A1Y2-01        |
|            |            |                        |                         |                   |            | TCGA-AN-A0XV-01        | Y                                    | TCGA-GM-A2DM-01        |

The **bold** indicates cross-alignments supported by other data.

<sup>1</sup>The number of common sample with both type1 and type2 profiles.

<sup>2</sup>The number of significant *cis*-pairs at q-value <0.05 at final iteration and the number of *cis*-pairs investigated. We investigated only *cis*-pairs that have more than 25% of samples with expressed RPPA or mRNA.

<sup>3</sup>Indicate the RNA sample of cross-aligned pairs are self-aligned or not in alignment between RNA profile (Agilent array or RNAseq) and CNV profile. The aligned pairs are also shown if there is a cross-aligned sample.

### Application to TCGA pan-cancer datasets

The *proMODMatcher* was also applied to pan-cancer datasets (total 22 different types of cancers) in TCGA to align miRNA (**Table 3**) and RPPA profiles (**Table 4**) with mRNA profiles. When aligning RNAseq and miRNAseq profiles, more than 95% of candidate profile pairs were identified as self-aligned for most cancer datasets (**Figure 8A**). The self-alignment rates for

1  
2  
3  
4  
5  
6  
7  
8  
9  
10  
11  
12  
13  
14  
15  
16  
17  
18  
19  
20  
21  
22  
23  
24  
25  
26  
27  
28  
29  
30  
31  
32  
33  
34  
35  
36  
37  
38  
39  
40  
41  
42  
43  
44  
45  
46  
47  
48  
49  
50  
51  
52  
53  
54  
55  
56  
57  
58  
59  
60  
61  
62  
63  
64  
65

321 SARC, DLBC, and CESC were 100%, suggesting high data quality for the datasets (**Figure 8A**,  
322 **Table 3**). On the other hand, miRNA expression profiles were aligned to mRNA expression  
323 profiles (i.e. Agilent, HG-U133, or RNAseq) at low self-alignments rate for the GBM dataset  
324 (**Figure 8A**), suggesting low quality of the TCGA GBM miRNA profiles.

325 For alignments between mRNA and RPPA profiles, the self-alignment rates were lower  
326 than alignments between mRNA and miRNA (**Figure 8B**) for most datasets due to lower  
327 numbers of cis-associations between mRNA and RPPA profiles. The self-alignment rates for  
328 DLBC (96.97%) and SARC (97.7%) were higher compared to other datasets (**Figure 8AB**),  
329 again suggesting high data qualities of the datasets. This observation indicates some datasets  
330 in TCGA showed consistently high confidence for sample quality and low data labeling errors.

331 Even in datasets of high quality, sample labeling errors were detected. For example, the  
332 self-alignment rate for mRNA-miRNA profiles of the TCGA UCEC dataset was 98%. Four  
333 cross-alignments were identified (**Table 3**). Two of them were likely due to a swap of miRNA  
334 profiles of TCGA-AX-A1C4-01 and TCGA-AX-A1CI-01 after considering other types of omics  
335 data (**Figure 8C**). Similarly, the self-alignment rate for mRNA-miRNA profiles of the TCGA OV  
336 dataset was 96.9%. Five cross-alignments were identified (**Table 3**). Two of them were likely  
337 due to a swap of miRNA profiles of TCGA-24-2261-01 and TCGA-31-1953-01 (**Figure 8D**).

## 339 Discussion

340 We developed a new sample alignment method, *proMODMatcher*, for detecting and correcting  
341 sample labeling errors by aligning omics profiles. The *proMODMatcher* extended our previous  
342 method *MODMatcher* by estimating probabilities of potential matches rather than using ranks of  
343 similarity scores. Applied to simulated datasets, *proMODMatcher* outperformed *MODMatcher*  
344 when aligning the omics data profiles with relatively small number of *cis*-associations. We

1  
2  
3  
4  
5  
6  
7  
8  
9  
10  
11  
12  
13  
14  
15  
16  
17  
18  
19  
20  
21  
22  
23  
24  
25  
26  
27  
28  
29  
30  
31  
32  
33  
34  
35  
36  
37  
38  
39  
40  
41  
42  
43  
44  
45  
46  
47  
48  
49  
50  
51  
52  
53  
54  
55  
56  
57  
58  
59  
60  
61  
62  
63  
64  
65

345 showed that the number of candidate intrinsic cis-association between mRNA-miRNA profiles or  
346 mRNA-RPPA profiles was low. Application of our *proMODMatcher* to alignment between  
347 mRNA-miRNA profile pairings and mRNA-RPPA profile pairings from 22 different cancer  
348 datasets in TCGA demonstrated that sample labeling errors occurred even in datasets of high  
349 quality and our procedure was not only able to identify sample labeling errors but also to  
350 unambiguously identify the source of the errors.

351 Integrating multi-omics data into comprehensive network models is essential to elucidate  
352 complex molecular mechanisms of cancers. After correcting sample labeling errors,  
353 associations between different profiles were stronger. For example, mis-labeled samples were  
354 outliers when comparing significant pairs between mRNA and miRNA expression levels in the  
355 TCGA BRCA dataset (**Figure 9A**, red dots were mis-labeled samples). Pearson correlation  
356 between expression levels of miRNAs and their host genes were improved for most pairs of  
357 miRNA-host genes after curating sample labeling errors (**Figure 9B**).

358 We showed that some potential cross-aligned profiles pairs in the TCGA BRCA dataset  
359 were missed by *proMODMatcher*. The sensitivity and accuracy of multi-omics profile matching  
360 methods needs further improvement. Integrating more than two types of profiles in probability  
361 estimation may yield more robust sensitivity and specificity when the number of cis-associations  
362 is small.

## 364 **Potential implications**

365 Our results demonstrated that sample labeling errors were common in large multi-omics  
366 datasets. Our method has improved statistical accuracy to identify and curate these errors over  
367 the previous method, and generally applicable to other data sets. Application of our general

1  
2  
3  
4  
5  
6 368 framework for automated curation of public databases and properly merging omics data would  
7  
8 369 be the fundamental basis for the development of effective integrative approaches.  
9

## 10 370 11 12 **Methods** 13 371

### 14 15 372 **A general framework of multi-omics data matching: Pairwise alignments based on *cis*-** 16 17 **associations** 18 373

19  
20 374 We followed the general framework of multi-omics data matching of the previous study [8]. Two  
21  
22 375 types of data (or profiles) (i.e. Type A and Type B in **Figure 1**) were matched based on their *cis*-  
23  
24 376 associations. Probes in different types of data were matched by intrinsic biological relationships.  
25  
26 377 For example, probes in methylation, miRNA and Copy number variation (CNV) profiles were  
27  
28 378 mapped to a close transcript based on hg19 reference genome. Samples were initially matched  
29  
30 379 based on annotated sample ID and potential *cis*-associations (**Figure 1A**). The significant *cis*-  
31  
32 380 associations from two different data types were identified by the Spearman correlations at  
33  
34 381 Benjamini-Hochberg (BH) adjusted q-value < 0.05 (**Figure 1B**). The data for each *cis*-  
35  
36 382 association was normal rank-transformed as  $RT(A_{n,i})$  and  $T(B_{n,i})$ , where  $A_{n,i}$  and  $B_{n,i}$   
37  
38 383 represents the measurements of sample  $i$  and  $n$ th *cis*-related probes for Type A and B profiles,  
39  
40 384 respectively (**Figure 1B**). For simplicity, we omitted all normal rank transformation in the rest of  
41  
42 385 notations. The profile similarity between the two types of data  $S(A_i, B_j)$  is defined as (**Figure**  
43  
44 386 **1C**):  
45  
46  
47  
48

$$49 \quad S(A_i, B_j) = corr(A_i, B_j)$$
$$50 = \frac{\sum_{n=1}^N A_{n,i} \sum_{n=1}^N B_{n,j} - N \sum_{n=1}^N A_{n,i} \times B_{n,j}}{\sqrt{N \sum_{n=1}^N A_{n,i}^2 - (\sum_{n=1}^N A_{n,i})^2} \sqrt{N \sum_{n=1}^N B_{n,i}^2 - (\sum_{n=1}^N B_{n,i})^2}}$$

51  
52 388  
53  
54  
55  
56  
57 389  
58  
59  
60  
61  
62  
63  
64  
65

1  
2  
3  
4  
5  
6  
7  
8  
9  
10  
11  
12  
13  
14  
15  
16  
17  
18  
19  
20  
21  
22  
23  
24  
25  
26  
27  
28  
29  
30  
31  
32  
33  
34  
35  
36  
37  
38  
39  
40  
41  
42  
43  
44  
45  
46  
47  
48  
49  
50  
51  
52  
53  
54  
55  
56  
57  
58  
59  
60  
61  
62  
63  
64  
65

390 First, profile pairs matched by annotated sample IDs were checked whether their similarity  
391 scores were high (**Figure 1D**) to be annotated as “self-aligned”. If not, additional steps were  
392 applied to find any potential matches among other unmatched profiles (**Figure 1E**). The  
393 matched profile pairs were then used to update significant *cis*-associations. We iteratively  
394 refined profile alignment and rounds of alignments were repeated until there were no further  
395 updates.

### 397 **Multi-Omics Data matcher (MODMatcher)**

398 In the “Determine self-aligned vs. cross-aligned” step (**Figure 1E**), the similarity scores of self-  
399 aligned profiles between type A and type B,  $S(A_i, B_i)$ , were top 5% ranked among  $S(A_n, B_i), n =$   
400  $1 \dots N_A$  as well as  $S(A_i, B_n), n = 1 \dots N_B$ , to be annotated as *self-aligned*, where  $N_A$  and  $N_B$   
401 represent the number of samples of type A and type B, respectively. If the sample sizes were  
402 bigger than 400, top 20 was used as the threshold for self-alignment. Next, for the profiles that  
403 were not self-aligned, reciprocal mapping was applied to find any potential matches among  
404 other unmatched profiles. If sample  $j$  of type A and sample  $k$  of type B,  $S(A_i, B_k)$  is 1<sup>st</sup> ranked  
405 among  $S(A_j, B_n), n = 1 \dots N_B$  as well as  $S(A_n, B_k), n = 1 \dots N_A$ , then the pair is annotated as  
406 *cross-aligned*.

### 408 **A probabilistic Multi-Omics Data matcher (proMODMatcher)**

409 The characteristics (noises, biases, dynamic ranges, and etc.) of two types of profiles may be  
410 different. The rank-based cutoff was not able to reflect similarity score differences in a specific  
411 similarity score distribution with a large or small variance (**Supplementary Figure S5**). In the  
412 “Determine self- vs. cross-aligned” step, the *proMODMatcher* evaluated a similarity score in a  
413 bivariate normal distribution,  $X \sim N_2(\boldsymbol{\mu}, \boldsymbol{\Sigma})$ , where  $\boldsymbol{\mu}$  is the mean vector and  $\boldsymbol{\Sigma}$  is the covariance

matrix (**Figure 1D**). The probability of a match between profile  $i$  of type A and profile  $j$  of type B,  $P(A_i, B_j) = P(S(A_i, B_j), S(A_i, B_j))$ , is estimated based on a score distribution of  $(S(A_i, B_m), S(A_m, B_j))$ , where  $A_m$  and  $B_m$  represent type A and type B profile of the  $m^{\text{th}}$  matched profile pairs, respectively. Given the bivariate normal distribution, we calculated the distance of a point  $x = (S(A_i, B_m), S(A_m, B_j))$  to the center of the distribution, known as Mahalanobis distance, as  $r = \sqrt{(x - \boldsymbol{\mu})^T \boldsymbol{\Sigma}^{-1} (x - \boldsymbol{\mu})}$ , and the cumulative function  $F(R \leq r) = 1 - e^{-r^2/2}$ . To obtain a more robust estimation of covariance matrix  $\boldsymbol{\Sigma}$  of the distribution, we added 1000 profile pairs of randomly permuted profiles in addition to true profile pairs.

Additionally, we introduced a prior probability of self-alignment  $p_0$ . Thus, given profiles  $A_i$  and  $B_j$  and their similarity score  $S(A_i, B_j)$  as well as estimated Mahalanobis distance  $r_{ij}$ , we calculated the p-value of the two profiles matched by chance as  $p(A_i, B_j) = \begin{cases} p_0 * e^{-r_{ij}^2/2}, & \text{if } i = j \\ e^{-r_{ij}^2/2}, & \text{if } i \neq j \end{cases}$ . In this study, the prior probability  $p_0$  was set as  $p_0 = 1/N_s$ , where  $N_s$  represents number of samples. We also set global similarity score cutoffs for self-alignment,  $S_{self}^{cutoff}$ , as well as cross-alignment,  $S_{cross}^{cutoff}$ . The  $S_{self}^{cutoff}$  value was set as the lower bound of 99% of the self-self similarity scores estimated by mean and standard deviations of  $S(A_i, B_i)$ , where  $i$  indicates the samples with both type A and Type B profiles. And the  $S_{cross}^{cutoff}$  was set as the lower bound of 68% of the self-self similarity scores.

The similarity score  $S(A_i, B_j)$  and its corresponding p-value  $p(A_i, B_j)$  were used to identify matched pairs between type A and type B profiles (**Figure 1E**). Each round of our procedure consisted of three steps. First, the self-alignment similarity score  $S(A_i, B_i)$  and corresponding p-value  $p(A_i, B_i)$  were calculated. If  $S(A_i, B_i) > S_{self}^{cutoff}$  and  $p(A_i, B_i) < p_{i \neq j}(A_i, B_j)$ , then the profiles  $A_i$  and  $B_i$  were self-aligned. Second, for a profile  $A_i$  that was not self-aligned

1  
2  
3  
4  
5  
6  
7  
8  
9  
10  
11  
12  
13  
14  
15  
16  
17  
18  
19  
20  
21  
22  
23  
24  
25  
26  
27  
28  
29  
30  
31  
32  
33  
34  
35  
36  
37  
38  
39  
40  
41  
42  
43  
44  
45  
46  
47  
48  
49  
50  
51  
52  
53  
54  
55  
56  
57  
58  
59  
60  
61  
62  
63  
64  
65

to the profile  $B_i$  in the first step, it was compared to all unmapped profile  $B_j$ . If the similarity score  $S(A_i, B_j) < S_{cross}^{cutoff}$  and the corresponding p-value  $p(A_i, B_j) \leq \arg \min_{n \in [1, \dots, N_B]} (p(A_i, B_n))$  and  $p(A_i, B_j) \leq \arg \min_{n \in [1, \dots, N_A]} (p(A_n, B_j))$ , then the profiles  $A_i$  and  $B_j$  were cross-aligned. Third, for profile pairs  $A_i$  and  $B_i$  that were not aligned in the first two steps, if  $S(A_i, B_i) > S_{self}^{cutoff}$  and the p-value  $p(A_i, B_i)$  was smaller than the fifth smallest among  $p(A_i, B_n), n = 1 \dots N_B$  as well as  $p(A_n, B_i), n = 1 \dots N_A$ , then the profiles  $A_i$  and  $B_i$  were rescored as self-aligned. The rounds of alignments were repeated until there was no further change.

**Correlation of cis-associated mRNA and miRNA before and after correcting labeling errors**

To assess improvement of signals after labeling error correction, we calculated Spearman correlation between miRNA expression and its host genes with initially matched pairs based on sample ID and with aligned sample pairs. To avoid bias due to different number of samples, we matched the number of samples of initially matched pairs to the number of aligned pairs. We randomly selected the samples with the same number of aligned pairs, and calculated the Spearman correlation. We performed random selection 100 times and calculated mean of correlation.

**Availability of source code and requirements**

- Project name: ProMODMatcher (passcode to decrypt the zipped file is “password123”)
- Project home page: <http://research.mssm.edu/integrative-network-biology/Software.html>
- Operating system: Platform independent
- Programming language: R

1  
2  
3  
4  
5  
6 459 Other requirements: R 3.5.1 or later  
7  
8 460 License: GNU General Public License  
9

10 461

11  
12  
13 462 **Availability of supporting data and materials**  
14

15 463 Data supporting the results of this article are deposited in Data supporting the results of this  
16  
17 464 article are publicly available at firehose database and TCGA data portal (see Data Description).  
18  
19

20 465

21  
22 466 **Declarations**  
23

24  
25 467 **List of abbreviations**  
26

- 27 468 TCGA: The Cancer Genome Atlas
- 28
- 29 469 QC: quality control
- 30
- 31 470 MODMatcher: Multi-Omics Data matcher
- 32
- 33 471 *pro*MODMatcher : A probabilistic Multi-Omics Data matcher
- 34
- 35 472 BH: Benjamini-Hochberg
- 36
- 37 473 FPR: false positive rate
- 38
- 39 474 RPPA: Reverse Phase Protein Array
- 40
- 41 475 CNV: Copy number variation
- 42
- 43 476 HM27: Illumina HumanMethylation27 Beadchip
- 44
- 45 477 HM450: Illumina HumanMethylation450 Beadchip
- 46
- 47 478 BRCA: breast invasive carcinoma
- 48
- 49 479 BLCA: Bladder urothelial carcinoma
- 50
- 51 480 CESC: Cervical and endocervical cancers
- 52
- 53 481 COAD: Colon adenocarcinoma
- 54
- 55 482 DLBC: Lymphoid Neoplasm Diffuse Large B-cell Lymphoma
- 56
- 57
- 58
- 59
- 60
- 61
- 62
- 63
- 64
- 65



- 1  
2  
3  
4  
5  
6 483 GBM: Glioblastoma multiforme  
7  
8 484 HNSC: Head and Neck squamous cell carcinoma  
9  
10 485 KIRC: Kidney renal clear cell carcinoma  
11  
12 486 KIRP: Kidney renal papillary cell carcinoma  
13  
14 487 LGG: Brain Lower Grade Glioma  
15  
16 488 LIHC: Liver hepatocellular carcinoma  
17  
18 489 LUAD: Lung adenocarcinoma  
19  
20 490 LUSC: Lung squamous cell carcinoma  
21  
22 491 OV: Ovarian serous cystadenocarcinoma  
23  
24 492 PRAD: Prostate adenocarcinoma  
25  
26 493 READ: Rectum adenocarcinoma  
27  
28 494 SARC: Sarcoma  
29  
30 495 SKCM: Skin Cutaneous Melanoma  
31  
32 496 STAD: Stomach adenocarcinoma  
33  
34 497 THCA: Thyroid carcinoma  
35  
36 498 UCEC: Uterine Corpus Endometrial Carcinoma  
37  
38  
39  
40  
41  
42  
43

44 500 **Consent for publication**

45  
46 501 Not applicable.  
47

48 502  
49

50 503 **Competing interests**

51  
52 504 The authors declare that they have no competing interests.  
53  
54

55 505  
56

57 506 **Funding**  
58  
59  
60  
61  
62  
63  
64  
65

1  
2  
3  
4  
5  
6  
7  
8  
9  
10  
11  
12  
13  
14  
15  
16  
17  
18  
19  
20  
21  
22  
23  
24  
25  
26  
27  
28  
29  
30  
31  
32  
33  
34  
35  
36  
37  
38  
39  
40  
41  
42  
43  
44  
45  
46  
47  
48  
49  
50  
51  
52  
53  
54  
55  
56  
57  
58  
59  
60  
61  
62  
63  
64  
65

507 This work was supported by National Institutes of Health [grant numbers R01-AG046170, U01-  
508 HG008451].

509

510 **Authors' contributions**

511 EL and JC designed research. EL performed research and analyzed data. SY contributed to  
512 download data and analyzed data by MODMatcher method. WW contributed design of  
513 simulation. ZT contributed revising paper. EL and JC wrote the paper. All authors read and  
514 approved the final manuscript.

515

516 **Acknowledgements**

517 We thank members of Zhu laboratory for discussions.

518

519 **REFERENCES**

520 1. Chen Y, Zhu J, Lum PY, Yang X, Pinto S, MacNeil DJ, et al. Variations in DNA elucidate  
521 molecular networks that cause disease. *Nature*. 2008;452 7186:429-35.

522 2. Cancer Genome Atlas N. Comprehensive molecular portraits of human breast tumours.  
523 *Nature*. 2012;490 7418:61-70. doi:10.1038/nature11412.

524 3. Lee E, de Ridder J, Kool J, Wessels LF and Bussemaker HJ. Identifying regulatory  
525 mechanisms underlying tumorigenesis using locus expression signature analysis.  
526 *Proceedings of the National Academy of Sciences of the United States of America*.  
527 2014;111 15:5747-52. doi:10.1073/pnas.1309293111.

528 4. Zhong H, Beaulaurier J, Lum PY, Molony C, Yang X, Macneil DJ, et al. Liver and  
529 adipose expression associated SNPs are enriched for association to type 2 diabetes.  
530 *PLoS Genet*. 2010;6 5:e1000932. doi:10.1371/journal.pgen.1000932.

1  
2  
3  
4  
5  
6  
7  
8  
9  
10  
11  
12  
13  
14  
15  
16  
17  
18  
19  
20  
21  
22  
23  
24  
25  
26  
27  
28  
29  
30  
31  
32  
33  
34  
35  
36  
37  
38  
39  
40  
41  
42  
43  
44  
45  
46  
47  
48  
49  
50  
51  
52  
53  
54  
55  
56  
57  
58  
59  
60  
61  
62  
63  
64  
65

531 5. Schadt EE, Molony C, Chudin E, Hao K, Yang X, Lum PY, et al. Mapping the genetic  
532 architecture of gene expression in human liver. *PLoS Biol.* 2008;6 5:e107.

533 6. Hsu YH, Zillikens MC, Wilson SG, Farber CR, Demissie S, Soranzo N, et al. An  
534 integration of genome-wide association study and gene expression profiling to prioritize  
535 the discovery of novel susceptibility Loci for osteoporosis-related traits. *PLoS genetics.*  
536 2010;6 6:e1000977. doi:10.1371/journal.pgen.1000977.

537 7. Westra HJ, Jansen RC, Fehrmann RS, te Meerman GJ, van Heel D, Wijmenga C, et al.  
538 MixupMapper: correcting sample mix-ups in genome-wide datasets increases power to  
539 detect small genetic effects. *Bioinformatics.* 2011;27 15:2104-11. doi:btr323 [pii]  
540 10.1093/bioinformatics/btr323.

541 8. Yoo S, Huang T, Campbell JD, Lee E, Tu Z, Geraci MW, et al. MODMatcher: multi-  
542 omics data matcher for integrative genomic analysis. *PLoS Comput Biol.* 2014;10  
543 8:e1003790. doi:10.1371/journal.pcbi.1003790.

544 9. Cibulskis K, McKenna A, Fennell T, Banks E, DePristo M and Getz G. ContEst:  
545 estimating cross-contamination of human samples in next-generation sequencing data.  
546 *Bioinformatics.* 2011;27 18:2601-2. doi:10.1093/bioinformatics/btr446.

547 10. Bergmann EA, Chen BJ, Arora K, Vacic V and Zody MC. Conpair: concordance and  
548 contamination estimator for matched tumor-normal pairs. *Bioinformatics.* 2016;32  
549 20:3196-8. doi:10.1093/bioinformatics/btw389.

550 11. Baskerville S and Bartel DP. Microarray profiling of microRNAs reveals frequent  
551 coexpression with neighboring miRNAs and host genes. *RNA.* 2005;11 3:241-7.  
552 doi:10.1261/rna.7240905.

1  
2  
3  
4  
5  
6  
7  
8  
9  
10  
11  
12  
13  
14  
15  
16  
17  
18  
19  
20  
21  
22  
23  
24  
25  
26  
27  
28  
29  
30  
31  
32  
33  
34  
35  
36  
37  
38  
39  
40  
41  
42  
43  
44  
45  
46  
47  
48  
49  
50  
51  
52  
53  
54  
55  
56  
57  
58  
59  
60  
61  
62  
63  
64  
65

553 12. Rodriguez A, Griffiths-Jones S, Ashurst JL and Bradley A. Identification of mammalian  
554 microRNA host genes and transcription units. *Genome Res.* 2004;14 10A:1902-10.  
555 doi:10.1101/gr.2722704.

557 **Figure legends**

558 **Figure 1. Overview of proMODMatcher procedure. (A)** Probes in two types of profiles (i.e.  
559 Type A and Type B) were matched by intrinsic biological relationships. **(B)** The significant *cis*-  
560 associations from two different data types were identified by the Spearman correlation. The data  
561 for each *cis* relationship was normal rank-transformed. **(C)** The sample similarity score between  
562 the two types of data  $S(A_i, B_j)$  is defined as Spearman correlation between normal rank-  
563 transformed profiles. **(D)** The proMODMatcher evaluated a similarity score of a match,  $S(A_i, B_j)$ ,  
564 by calculating probability of a match estimated based on a score distribution  
565 of  $(S(A_i, B_n), S(A_n, B_j))$ , where  $A_n$  and  $B_n$  represent type A and type B profile of the  $n^{\text{th}}$  matched  
566 profile pairs. **(E)** In the Determine self-aligned vs. cross-aligned step, profile pairs matched by  
567 sample IDs were checked whether their similarity scores were high to be annotated as “self-  
568 aligned”. If not, additional steps were applied to find any potential matches among other  
569 unmatched profiles. The matched profile pairs were used to update significant *cis*-associations.

570  
571 **Figure 2. Application of MODMatcher to simulated data sets.** We simulated data sets with  
572 different numbers of samples and significant *cis*-associations. For variable number of samples  
573 and significant *cis*-associations, sensitivity and false positive rate (FPR, 1-specificity) were  
574 measured and plotted.

1  
2  
3  
4  
5  
6  
7  
8  
9  
10  
11  
12  
13  
14  
15  
16  
17  
18  
19  
20  
21  
22  
23  
24  
25  
26  
27  
28  
29  
30  
31  
32  
33  
34  
35  
36  
37  
38  
39  
40  
41  
42  
43  
44  
45  
46  
47  
48  
49  
50  
51  
52  
53  
54  
55  
56  
57  
58  
59  
60  
61  
62  
63  
64  
65

**Figure 3. Application of *proMODMatcher* to simulated data sets.** (A) For variable number of samples and significant *cis*-associations specificity and FPR were measured based on simulated data sets with 0%, 4% and 6% sample labeling error rate. (B-C) F measure, sensitivity, and specificity were compared with MODMatcher's results.

**Figure 4. Aligning gene expression profiles by RNAseq and miRNAseq data.** (A) An example of miRNAs (e.g. miR-452) that are embedded in gene regions (e.g. *GABRE*). (B) Expression level of miR-452 was highly associated with mRNA expression of *GABRE*. (C) The rank of the similarity scores of self-self RNAseq-miRNAseq profiles. (D) An example of the similarity score of the self-aligned profiles, TCGA-D8-A1JH-01. The similarity score between RNAseq profile of TCGA-D8-A1JH-01 and miRNA profiles of other samples were shown. The red star indicates similarity score of self-self RNAseq-miRNAseq profiles. (E) An example of non self-aligned RNAseq-miRNA profiles, TCGA-B6-A0X7-01. (F) The probabilities of similarity scores (before multiplying prior probability) for self-aligned RNAseq-miRNAseq profiles. (G) An example of similarity scores of self-aligned RNAseq-miRNA profile pairs. X-axis indicates the similarity scores between RNAseq profile of TCGA-OL-A6VO-01 and miRNAseq profiles of all other samples, and y-axis indicates similarity scores between miRNAseq profile of TCGA-OL-A6VO-01 and RNAseq profiles of all other samples. The red dot indicates similarity score for self-self RNAseq-miRNAseq profile. (H) An example of similarity scores of non self-aligned RNAseq-miRNA profile pairs.

**Figure 5. Comparison of MODMatcher and *proMODMatcher* for aligning expression profiles by RNAseq and miRNAseq data.** (A) The similarity scores of a self-aligned RNAseq-miRNA profile pair identified by *proMODMatcher*, but not by MODMatcher. X-axis indicates the

1  
2  
3  
4  
5  
6  
7  
8  
9  
10  
11  
12  
13  
14  
15  
16  
17  
18  
19  
20  
21  
22  
23  
24  
25  
26  
27  
28  
29  
30  
31  
32  
33  
34  
35  
36  
37  
38  
39  
40  
41  
42  
43  
44  
45  
46  
47  
48  
49  
50  
51  
52  
53  
54  
55  
56  
57  
58  
59  
60  
61  
62  
63  
64  
65

600 similarity score between RNAseq profile of TCGA-AO-A0JF-01 and miRNAseq profiles of all  
601 other samples, and y-axis indicates similarity score between miRNAseq profile of TCGA-AO-  
602 A0JF-01 and RNAseq profiles of all other samples. The red dot indicates similarity score for  
603 self-self RNAseq-miRNAseq profiles. **(B)** One cross-aligned pair, RNAseq of TCGA-BH-A0BZ-  
604 01 and miRNA of TCGA-E2-A15K-01, identified by *proMODMatcher*. The similarity score of the  
605 cross-aligned pair was shown in blue and the similarity scores of self-self alignments was shown  
606 in red. **(C)** Significance levels of *cis*-associations based on profile pairs aligned by *MODMatcher*  
607 and *proMODMatcher*.

**Figure 6. Aligning gene expression profiles by Agilent array and miRNAseq data (A)** An  
610 example of possible sample swaps. In alignment of Agilent array and miRNAseq profiles,  
611 TCGA-BH-A18K-01 and TCGA-BH-A18I-01 were cross-aligned to each other. The similarity  
612 scores of each cross-alignment were shown. The similarity score of the cross-aligned pair was  
613 shown in blue and the similarity scores of self-self alignments were shown in red. **(B)** Other  
614 omics profiles of TCGA-BH-A18K and TCGA-BH-A18I were compared with each other and  
615 results were summarized into a patient-centric view. Red line indicates self-aligned, and blue  
616 line indicates cross-aligned. **(C)** After swapping the corresponding mRNA Agilent array profiles,  
617 multiple-omics profiles of TCGA-BH-A18K and TCGA-BH-A18T were aligned to each other  
618 consistently. **(D-F)** The similarity scores of other cross-aligned pairs were shown, and their  
619 available omics profiles and alignment results were summarized into a patient-centric view.

**Figure 7. Aligning mRNA and RPPA profiles. (A)** The Spearman correlations of protein  
622 abundance and the corresponding mRNA's expression level were shown based on RNAseq and  
623 Agilent array. The red line indicates correlation values corresponding to q-value 0.05. **(B)**

1  
2  
3  
4  
5  
6  
7  
8  
9  
10  
11  
12  
13  
14  
15  
16  
17  
18  
19  
20  
21  
22  
23  
24  
25  
26  
27  
28  
29  
30  
31  
32  
33  
34  
35  
36  
37  
38  
39  
40  
41  
42  
43  
44  
45  
46  
47  
48  
49  
50  
51  
52  
53  
54  
55  
56  
57  
58  
59  
60  
61  
62  
63  
64  
65

624 Similarity scores of a self-aligned RNAseq-miRNA profile pair **(C)** Similarity scores of a cross-  
625 aligned RNAseq-miRNA profile pair. **(D)** Similarity scores of the cross-aligned pair between the  
626 mRNA Agilent microarray and RPPA profiles, TCGA-AR-A1AV-01 and TCGA-AR-A1AW-01,  
627 and alignment results for other omics profiles of this pair into a patient centric view.

628  
629  
630 **Figure 8. Application to TCGA pan-cancer datasets. (A-B)** The self-alignment rate of RNA-  
631 miRNA and RNA-RPPA alignment for each cancer type. **(C-D)** Two possible sample swap  
632 cases of miRNA profiles in the TCGA UCEC and OV datasets. The similarity scores of each  
633 cross-alignment and alignment results for other available omics profiles were shown.

634  
635 **Figure 9. Correcting sample labeling errors. (A)** Mis-labeled samples were outliers when  
636 comparing significant pairs between mRNA and miRNA expression levels in the TCGA BRCA  
637 dataset. Red dots were mis-labeled samples. **(B)** Spearman correlation between expression  
638 levels of miRNAs and their host genes before and after curating sample labeling errors.

14  
15  
16  
17  
18  
19  
20  
21  
22  
23  
24  
25  
26  
27  
28  
29  
30  
31  
32  
33  
34  
35  
36  
37  
38  
39  
40  
41  
42  
43  
44  
45  
46  
47  
48  
49  
50  
51  
52  
53  
54  
55  
56  
57  
58  
59  
60  
61  
62  
63  
64  
65

640 **Table 3.** Application of *proMODMatcher* to mRNA and miRNA profiles of TCGA cancer data excluding BRCA.

| Types of cancer | Data types | Data types  | # Common samples | # cis pair | # of self-aligned | # of cross-aligned | Cross-aligned pairs | Self-aligned in RNA-CNV | Cross-aligned pairs |
|-----------------|------------|-------------|------------------|------------|-------------------|--------------------|---------------------|-------------------------|---------------------|
|                 | Type1      | Type 2      |                  |            |                   |                    | Type 1              |                         | Type 2              |
| BLCA            | RNAseq     | miRNAseq    | 405              | 187/231    | 402 (99.2%)       | 0                  |                     |                         |                     |
| CESC            | RNAseq     | miRNAseq    | 100              | 132/223    | 100 (100%)        | 0                  |                     |                         |                     |
| COAD            | RNAseq     | miRNAseq    | 248              | 122/191    | 242 (97.5%)       | 8 (3.2%)           | TCGA-CM-4744-01     | Y                       | TCGA-AA-3558-01     |
|                 |            |             |                  |            |                   |                    | TCGA-QL-A97D-01     | Y                       | TCGA-AA-A00W-01     |
|                 |            |             |                  |            |                   |                    | TCGA-A6-A567-01     | Y                       | TCGA-AA-3693-01     |
|                 |            |             |                  |            |                   |                    | TCGA-5M-AATA-01     | Y                       | TCGA-AA-3529-01     |
|                 |            |             |                  |            |                   |                    | TCGA-RU-A8FL-01     | Y                       | TCGA-AZ-4681-01     |
|                 |            |             |                  |            |                   |                    | TCGA-QG-A5YV-01     | Y                       | TCGA-AA-A02H-01     |
|                 |            |             |                  |            |                   |                    | TCGA-A6-A565-01     | Y                       | TCGA-AA-A02E-01     |
|                 |            |             |                  |            |                   |                    | TCGA-5M-AATE-01     | Y                       | TCGA-AA-A01F-01     |
| DLBC            | RNAseq     | miRNAseq    | 47               | 59/210     | 47 (100%)         | 0 (0%)             |                     |                         |                     |
| GBM             | Agilent    | miRNA array | 525              | 73/107     | 307 (58.4%)       | 14(2.6%)           | TCGA-02-0064-01     | Y                       | TCGA-08-0390-01     |
|                 |            |             |                  |            |                   |                    | TCGA-02-0325-01     | Y                       | TCGA-08-0345-01     |
|                 |            |             |                  |            |                   |                    | TCGA-02-0321-01     | Y                       | TCGA-19-0957-01     |
|                 |            |             |                  |            |                   |                    | TCGA-08-0510-01     | Y                       | TCGA-26-5135-01     |
|                 |            |             |                  |            |                   |                    | TCGA-02-0070-01     | Y                       | TCGA-28-5218-01     |
|                 |            |             |                  |            |                   |                    | TCGA-12-0773-01     | Y                       | TCGA-06-0744-01     |
|                 |            |             |                  |            |                   |                    | TCGA-12-0780-01     | Y                       | TCGA-08-0354-01     |
|                 |            |             |                  |            |                   |                    | TCGA-12-0822-01     | Y                       | TCGA-16-1045-01     |
|                 |            |             |                  |            |                   |                    | TCGA-16-1062-01     | Y                       | TCGA-28-5209-01     |
|                 |            |             |                  |            |                   |                    | TCGA-14-1829-01     | Y                       | TCGA-14-1450-01     |
|                 |            |             |                  |            |                   |                    | TCGA-19-1385-01     | Y                       | TCGA-08-0352-01     |
|                 |            |             |                  |            |                   |                    | TCGA-32-4719-01     | Y                       | TCGA-06-0140-01     |
|                 |            |             |                  |            |                   |                    | TCGA-19-5952-01     | Y                       | TCGA-02-0324-01     |
|                 |            |             |                  |            |                   |                    | TCGA-06-0201-01     | No                      | TCGA-06-0141-01     |
|                 | HG-U133    | miRNA array | 520              | 56/100     | 315 (60.5%)       | 5 (0.9%)           | TCGA-02-0058-01     | No: TCGA-06-0190-01     | TCGA-12-0778-01     |
|                 |            |             |                  |            |                   |                    | TCGA-02-0115-01     | Y                       | TCGA-12-0656-01     |
|                 |            |             |                  |            |                   |                    | TCGA-19-1789-01     | Y                       | TCGA-06-0413-01     |
|                 |            |             |                  |            |                   |                    | TCGA-06-2561-01     | Y                       | TCGA-12-0691-01     |
|                 |            |             |                  |            |                   |                    | TCGA-02-0338-01     | Y                       | TCGA-76-6283-01     |



14  
15  
16  
17  
18  
19  
20  
21  
22  
23  
24  
25  
26  
27  
28  
29  
30  
31  
32  
33  
34  
35  
36  
37  
38  
39  
40  
41  
42  
43  
44  
45  
46  
47  
48  
49  
50  
51  
52  
53  
54  
55  
56  
57  
58  
59  
60  
61  
62  
63  
64  
65

|      |         |             |     |         |             |            |                        |                     |                        |
|------|---------|-------------|-----|---------|-------------|------------|------------------------|---------------------|------------------------|
|      | RNAseq  | miRNA array | 151 | 70/129  | 115 (76.1%) | 19 (12.5%) | TCGA-06-1804-01        | Y                   | TCGA-81-5911-01        |
|      |         |             |     |         |             |            | TCGA-06-0178-01        | No                  | TCGA-16-1060-01        |
|      |         |             |     |         |             |            | TCGA-14-1034-01        | Y                   | TCGA-02-0330-01        |
|      |         |             |     |         |             |            | TCGA-15-0742-01        | Y                   | TCGA-02-0116-01        |
|      |         |             |     |         |             |            | TCGA-06-5413-01        | Y                   | TCGA-14-0865-01        |
|      |         |             |     |         |             |            | TCGA-19-2620-01        | Y                   | TCGA-76-6193-01        |
|      |         |             |     |         |             |            | TCGA-06-0158-01        | Y                   | TCGA-06-0174-01        |
|      |         |             |     |         |             |            | TCGA-06-0211-01        | Y                   | TCGA-12-3648-01        |
|      |         |             |     |         |             |            | TCGA-06-2564-01        | Y                   | TCGA-12-0688-01        |
|      |         |             |     |         |             |            | TCGA-06-0141-01        | Y                   | TCGA-08-0246-01        |
|      |         |             |     |         |             |            | TCGA-06-0238-01        | Y                   | TCGA-06-0177-01        |
|      |         |             |     |         |             |            | TCGA-06-0744-01        | Y                   | TCGA-76-6664-01        |
|      |         |             |     |         |             |            | TCGA-06-0125-01        | Y                   | TCGA-08-0358-01        |
|      |         |             |     |         |             |            | TCGA-41-2572-01        | Y                   | TCGA-02-0021-01        |
|      |         |             |     |         |             |            | TCGA-06-0190-02        | Y                   | TCGA-19-5955-01        |
|      |         |             |     |         |             |            | TCGA-28-2499-01        | No: TCGA-02-0099-01 | TCGA-12-1091-01        |
|      |         |             |     |         |             |            | TCGA-06-0152-02        | Y                   | TCGA-26-1799-01        |
|      |         |             |     |         |             |            | TCGA-19-1389-02        | Y                   | TCGA-14-0813-01        |
|      |         |             |     |         |             |            | TCGA-14-1034-02        | Y                   | TCGA-15-1447-01        |
| HNSC | RNAseq  | miRNAseq    | 517 | 183/229 | 494 (95.5%) | 0 (0%)     |                        |                     |                        |
| KIRC | RNAseq  | miRNAseq    | 516 | 146/205 | 487 (94.3%) | 0 (0%)     |                        |                     |                        |
| KIRP | RNAseq  | miRNAseq    | 290 | 131/205 | 285 (98.2%) | 0 (0%)     |                        |                     |                        |
| LAML | RNAseq  | miRNAseq    | 173 | 93/166  | 168 (97.1%) | 0          |                        |                     |                        |
| LGG  | RNAseq  | miRNAseq    | 526 | 170/245 | 500 (95.0%) | 0          |                        |                     |                        |
| LIHC | RNAseq  | miRNAseq    | 369 | 179/228 | 369 (99.4%) | 0          |                        |                     |                        |
| LUAD | RNAseq  | miRNAseq    | 512 | 179/229 | 507 (99.0%) | 0          |                        |                     |                        |
|      | Agilent | miRNAseq    | 32  | 32/180  | 17 (53.1%)  | 3 (9.3%)   | TCGA-44-2655-01        | Y                   | TCGA-44-6148-01        |
|      |         |             |     |         |             |            | TCGA-05-4249-01        | No                  | TCGA-86-A4D0-01        |
|      |         |             |     |         |             |            | TCGA-35-4123-01        | No                  | TCGA-55-6969-01        |
| LUSC | RNAseq  | miRNAseq    | 474 | 191/229 | 466 (98.3%) | 0 (0%)     |                        |                     |                        |
| OV   | RNAseq  | miRNAseq    | 291 | 159/192 | 282 (96.9%) | 5 (1.7%)   | <u>TCGA-24-2261-01</u> | <u>Y</u>            | <u>TCGA-31-1953-01</u> |
|      |         |             |     |         |             |            | <u>TCGA-31-1953-01</u> | <u>Y</u>            | <u>TCGA-24-2261-01</u> |
|      |         |             |     |         |             |            | TCGA-61-1728-01        | Y                   | TCGA-23-2072-01        |
|      |         |             |     |         |             |            | TCGA-09-0369-01        | Y                   | TCGA-25-1877-01        |
|      |         |             |     |         |             |            | TCGA-VG-A8LO-01        | Y                   | TCGA-04-1654-01        |
| PRAD | RNAseq  | miRNAseq    | 494 | 129/198 | 432 (87.4%) | 0          |                        |                     |                        |

|      |        |          |     |         |             |          |                        |          |                        |
|------|--------|----------|-----|---------|-------------|----------|------------------------|----------|------------------------|
| READ | RNAseq | miRNAseq | 66  | 77/180  | 60 (90.9%)  | 3 (4.5%) | TCGA-AG-A01J-01        | Y        | TCGA-DY-A1DG-01        |
|      |        |          |     |         |             |          | TCGA-AG-A014-01        | Y        | TCGA-DC-6158-01        |
|      |        |          |     |         |             |          | TCGA-AG-A023-01        | Y        | TCGA-AG-4022-01        |
| SARC | RNAseq | miRNAseq | 261 | 169/220 | 261 (100%)  | 0        |                        |          |                        |
| SKCM | RNAseq | miRNAseq | 449 | 203/251 | 446 (99.3%) | 0        |                        |          |                        |
| STAD | RNAseq | miRNAseq | 377 | 193/256 | 371 (98.4%) | 0        |                        |          |                        |
| THCA | RNAseq | miRNAseq | 508 | 139/217 | 483 (95.0%) | 0        |                        |          |                        |
| UCEC | RNAseq | miRNAseq | 361 | 169/240 | 354 (98.0%) | 4 (1.1%) | TCGA-A5-A0GP-01        | Y        | TCGA-AJ-A2QO-01        |
|      |        |          |     |         |             |          | <u>TCGA-AX-A1C4-01</u> | <u>Y</u> | <u>TCGA-AX-A1CI-01</u> |
|      |        |          |     |         |             |          | <u>TCGA-AX-A1CI-01</u> | <u>Y</u> | <u>TCGA-AX-A1C4-01</u> |
|      |        |          |     |         |             |          | TCGA-BG-A220-01        | No       | TCGA-AJ-A3NE-01        |

Underlines indicates sample swaps

641  
642  
643  
  
644  
  
645  
  
646  
  
647  
  
648  
  
649  
  
650  
  
651  
  
652  
  
653

14  
15  
16  
17  
18  
19  
20  
21  
22  
23  
24  
25  
26  
27  
28  
29  
30  
31  
32  
33  
34  
35  
36  
37  
38  
39  
40  
41  
42  
43  
44  
45  
46  
47  
48  
49  
50  
51  
52  
53  
54  
55  
56  
57  
58  
59  
60  
61  
62  
63  
64  
65

654 **Table 4.** Application of *proMODMatcher* to mRNA and RPPA profiles of TCGA cancer data excluding BRCA

| Types of cancer | Data types | Data types | # Common samples | # cis pair | # of self-aligned | # of cross-aligned | Cross-aligned pairs    | Self-aligned in RNA-CNV | Cross-aligned pairs    |
|-----------------|------------|------------|------------------|------------|-------------------|--------------------|------------------------|-------------------------|------------------------|
|                 | Type1      | Type 2     | Type 1           |            |                   |                    | Type 1                 |                         | Type 2                 |
| BLCA            | RNAseq     | RPPA       | 340              | 121/193    | 297 (87.3%)       | 3 (0.8%)           | TCGA-XF-AAN8-01        | Y                       | TCGA-FD-A6TB-01        |
|                 |            |            |                  |            |                   |                    | TCGA-FD-A5BR-01        | Y                       | TCGA-XF-AAMF-01        |
|                 |            |            |                  |            |                   |                    | TCGA-E7-A6ME-01        | Y                       | TCGA-E7-A541-01        |
| CESC            | RNAseq     | RPPA       | 172              | 101/184    | 152 (88.8%)       | 1 (0.5%)           | TCGA-EK-A3GJ-01        | Y                       | TCGA-C5-A8XI-01        |
| COAD            | RNAseq     | RPPA       | 240              | 110/202    | 195 (81.2%)       | 15 (6.2%)          | TCGA-G4-6321-01        | Y                       | TCGA-AA-A01P-01        |
|                 |            |            |                  |            |                   |                    | TCGA-AD-A5EJ-01        | Y                       | TCGA-AA-3672-01        |
|                 |            |            |                  |            |                   |                    | TCGA-CA-5256-01        | Y                       | TCGA-AA-3815-01        |
|                 |            |            |                  |            |                   |                    | TCGA-AZ-4682-01        | Y                       | TCGA-G4-6321-01        |
|                 |            |            |                  |            |                   |                    | TCGA-G4-6303-01        | Y                       | TCGA-A6-2677-01        |
|                 |            |            |                  |            |                   |                    | TCGA-A6-6137-01        | Y                       | TCGA-AA-A01S-01        |
|                 |            |            |                  |            |                   |                    | TCGA-G4-6627-01        | Y                       | TCGA-G4-6298-01        |
|                 |            |            |                  |            |                   |                    | TCGA-A6-6140-01        | Y                       | TCGA-AA-3519-01        |
|                 |            |            |                  |            |                   |                    | TCGA-NH-A5IV-01        | Y                       | TCGA-AA-A00E-01        |
|                 |            |            |                  |            |                   |                    | TCGA-G4-6320-01        | Y                       | TCGA-A6-2672-01        |
|                 |            |            |                  |            |                   |                    | TCGA-DM-A28H-01        | Y                       | TCGA-AA-3811-01        |
|                 |            |            |                  |            |                   |                    | TCGA-CK-5913-01        | Y                       | TCGA-AA-3664-01        |
|                 |            |            |                  |            |                   |                    | TCGA-NH-A50U-01        | Y                       | TCGA-AA-3558-01        |
|                 |            |            |                  |            |                   |                    | TCGA-AD-6901-01        | Y                       | TCGA-NH-A6GC-06        |
|                 |            |            |                  |            |                   |                    | TCGA-A6-A565-01        | Y                       | TCGA-AA-3520-01        |
| DLBC            | RNAseq     | RPPA       | 33               | 58/184     | 32 (96.9%)        | 0 (0%)             |                        |                         |                        |
| GBM             | Agilent    | RPPA       | 191              | 97/194     | 157 (82.1%)       | 13 (6.8%)          | TCGA-06-0139-01        | No                      | TCGA-06-A5U1-01        |
|                 |            |            |                  |            |                   |                    | TCGA-06-0158-01        | Y                       | TCGA-19-5950-01        |
|                 |            |            |                  |            |                   |                    | TCGA-06-0176-01        | Y                       | TCGA-19-2625-01        |
|                 |            |            |                  |            |                   |                    | TCGA-06-0206-01        | Y                       | TCGA-06-0190-02        |
|                 |            |            |                  |            |                   |                    | TCGA-12-0620-01        | Y                       | TCGA-RR-A6KC-01        |
|                 |            |            |                  |            |                   |                    | TCGA-06-0881-01        | Y                       | TCGA-02-0003-01        |
|                 |            |            |                  |            |                   |                    | TCGA-14-1454-01        | Y                       | TCGA-19-A6J5-01        |
|                 |            |            |                  |            |                   |                    | <b>TCGA-12-1091-01</b> | <b>Y</b>                | <b>TCGA-14-1034-02</b> |
|                 |            |            |                  |            |                   |                    | TCGA-14-1037-01        | No                      | TCGA-19-A60I-01        |
|                 |            |            |                  |            |                   |                    | TCGA-14-1795-01        | Y                       | TCGA-12-5301-01        |
|                 |            |            |                  |            |                   |                    | TCGA-32-2616-01        | Y                       | TCGA-06-5858-01        |
|                 |            |            |                  |            |                   |                    | TCGA-81-5911-01        | Y                       | TCGA-19-1389-02        |
|                 |            |            |                  |            |                   |                    | TCGA-14-1450-01        | Y                       | TCGA-06-5418-01        |

|      |         |      |     |         |             |           |                        |          |                        |
|------|---------|------|-----|---------|-------------|-----------|------------------------|----------|------------------------|
|      | HG-U133 | RPPA | 186 | 90/187  | 147 (79.0%) | 13 (6.9%) | TCGA-02-0068-01        | Y        | TCGA-06-5413-01        |
|      |         |      |     |         |             |           | TCGA-02-0033-01        | No       | TCGA-32-4211-01        |
|      |         |      |     |         |             |           | TCGA-14-0781-01        | Y        | TCGA-74-6575-01        |
|      |         |      |     |         |             |           | <b>TCGA-12-1091-01</b> | <b>Y</b> | <b>TCGA-14-1034-02</b> |
|      |         |      |     |         |             |           | TCGA-28-2509-01        | Y        | TCGA-19-A60I-01        |
|      |         |      |     |         |             |           | TCGA-06-0141-01        | Y        | TCGA-06-A5U1-01        |
|      |         |      |     |         |             |           | TCGA-06-0160-01        | Y        | TCGA-06-6700-01        |
|      |         |      |     |         |             |           | TCGA-06-0394-01        | Y        | TCGA-74-6578-01        |
|      |         |      |     |         |             |           | TCGA-08-0518-01        | Y        | TCGA-26-6173-01        |
|      |         |      |     |         |             |           | TCGA-08-0512-01        | Y        | TCGA-19-1389-02        |
|      |         |      |     |         |             |           | TCGA-02-0330-01        | Y        | TCGA-06-A6S1-01        |
|      |         |      |     |         |             |           | TCGA-32-2491-01        | Y        | TCGA-06-6698-01        |
|      |         |      |     |         |             |           | TCGA-32-4719-01        | Y        | TCGA-06-0876-01        |
|      | RNAseq  | RPPA | 83  | 106/201 | 75 (90.3%)  | 25        |                        |          |                        |
| HNSC | RNAseq  | RPPA | 212 | 82/156  | 175 (82.5%) | 3 (1.4%)  | TCGA-CQ-6222-01        | No       | TCGA-CV-5439-01        |
|      |         |      |     |         |             |           | TCGA-D6-6824-01        | Y        | TCGA-CV-5976-01        |
|      |         |      |     |         |             |           | TCGA-MZ-A7D7-01        | Y        | TCGA-CN-6011-01        |
| KIRC | RNAseq  | RPPA | 475 | 125/209 | 396 (83.3%) | 4 (0.8%)  | TCGA-CJ-5681-01        | Y        | TCGA-B0-5709-01        |
|      |         |      |     |         |             |           | TCGA-B0-5709-01        | Y        | TCGA-CJ-6030-01        |
|      |         |      |     |         |             |           | TCGA-CJ-4869-01        | Y        | TCGA-BP-4771-01        |
|      |         |      |     |         |             |           | TCGA-CJ-4888-01        | Y        | TCGA-CJ-4875-01        |
| KIRP | RNAseq  | RPPA | 215 | 93/184  | 178 (82.7%) | 3 (1.3%)  | TCGA-KV-A74V-01        | Y        | TCGA-MH-A55Z-01        |
|      |         |      |     |         |             |           | TCGA-MH-A854-01        | Y        | TCGA-UZ-A9PL-01        |
|      |         |      |     |         |             |           | TCGA-MH-A561-01        | Y        | TCGA-B1-A47N-01        |
| LGG  | RNAseq  | RPPA | 435 | 95/173  | 320 (73.5%) | 1 (0.2%)  | TCGA-HT-7681-01        | Y        | TCGA-P5-A737-01        |
| LIHC | RNAseq  | RPPA | 181 | 105/214 | 158 (87.2%) | 4 (2.2%)  | TCGA-ZS-A9CD-01        | Y        | TCGA-G3-A5SK-01        |
|      |         |      |     |         |             |           | TCGA-DD-AAC9-01        | Y        | TCGA-DD-A4NG-01        |
|      |         |      |     |         |             |           | TCGA-G3-AAV0-01        | Y        | TCGA-GJ-A9DB-01        |
|      |         |      |     |         |             |           | TCGA-G3-AAV5-01        | Y        | TCGA-ED-A627-01        |
| LUAD | RNAseq  | RPPA | 360 | 125/193 | 312 (86.6%) | 10 (2.7%) | TCGA-50-5045-01        | No       | TCGA-44-7672-01        |
|      |         |      |     |         |             |           | TCGA-44-7667-01        | Y        | TCGA-44-3917-01        |
|      |         |      |     |         |             |           | TCGA-MP-A4TI-01        | Y        | TCGA-MP-A4TA-01        |
|      |         |      |     |         |             |           | TCGA-MP-A4TJ-01        | Y        | TCGA-50-5939-01        |
|      |         |      |     |         |             |           | TCGA-50-5055-01        | No       | TCGA-97-A4M2-01        |
|      |         |      |     |         |             |           | TCGA-55-A48X-01        | Y        | TCGA-64-5778-01        |
|      |         |      |     |         |             |           | TCGA-64-5775-01        | No       | TCGA-05-5715-01        |
|      |         |      |     |         |             |           | TCGA-55-6987-01        | Y        | TCGA-44-2664-01        |

|      |         |      |     |         |             |           |                 |    |                 |
|------|---------|------|-----|---------|-------------|-----------|-----------------|----|-----------------|
|      |         |      |     |         |             |           | TCGA-38-7271-01 | Y  | TCGA-50-5068-01 |
|      |         |      |     |         |             |           | TCGA-55-8208-01 | Y  | TCGA-50-5066-01 |
|      | Agilent | RPPA | 23  | 34/187  | 14 (60.8%)  | 7 (30.4%) | TCGA-44-2661-01 | No | TCGA-05-4249-01 |
|      |         |      |     |         |             |           | TCGA-05-4249-01 | No | TCGA-55-6978-01 |
|      |         |      |     |         |             |           | TCGA-44-3398-01 | No | TCGA-86-A4JF-01 |
|      |         |      |     |         |             |           | TCGA-44-4112-01 | No | TCGA-44-3919-01 |
|      |         |      |     |         |             |           | TCGA-44-2662-01 | Y  | TCGA-78-7145-01 |
|      |         |      |     |         |             |           | TCGA-67-3774-01 | Y  | TCGA-73-7498-01 |
|      |         |      |     |         |             |           | TCGA-35-3621-01 | No | TCGA-44-2661-01 |
| LUSC | RNAseq  | RPPA | 324 | 125/193 | 278 (85.8%) | 3 (0.9%)  | TCGA-18-4086-01 | Y  | TCGA-63-5131-01 |
|      |         |      |     |         |             |           | TCGA-39-5039-01 | Y  | TCGA-34-2604-01 |
|      |         |      |     |         |             |           | TCGA-56-A4ZJ-01 | Y  | TCGA-90-6837-01 |
| OV   | RNAseq  | RPPA | 241 | 134/202 | 232 (96.2%) | 9 (3.7%)  | TCGA-61-2095-01 | Y  | TCGA-42-2587-01 |
|      |         |      |     |         |             |           | TCGA-09-0364-01 | Y  | TCGA-29-1774-01 |
|      |         |      |     |         |             |           | TCGA-09-2048-01 | Y  | TCGA-13-0802-01 |
|      |         |      |     |         |             |           | TCGA-13-0890-01 | Y  | TCGA-42-2590-01 |
|      |         |      |     |         |             |           | TCGA-24-2035-01 | Y  | TCGA-30-1892-01 |
|      |         |      |     |         |             |           | TCGA-25-1870-01 | Y  | TCGA-36-2534-01 |
|      |         |      |     |         |             |           | TCGA-31-1956-01 | Y  | TCGA-29-1768-01 |
|      |         |      |     |         |             |           | TCGA-57-1583-01 | Y  | TCGA-61-1916-01 |
|      |         |      |     |         |             |           | TCGA-59-2350-01 | Y  | TCGA-61-1913-01 |
| PRAD | RNAseq  | RPPA | 351 | 96/178  | 209 (59.5%) | 9 (2.5%)  | TCGA-VN-A88I-01 | Y  | TCGA-KC-A4BV-01 |
|      |         |      |     |         |             |           | TCGA-KC-A7F3-01 | Y  | TCGA-ZG-A8QX-01 |
|      |         |      |     |         |             |           | TCGA-FC-A6HD-01 | No | TCGA-EJ-A8FN-01 |
|      |         |      |     |         |             |           | TCGA-EJ-5499-01 | Y  | TCGA-VN-A88L-01 |
|      |         |      |     |         |             |           | TCGA-HC-7230-01 | Y  | TCGA-HC-7748-01 |
|      |         |      |     |         |             |           | TCGA-XJ-A83G-01 | Y  | TCGA-G9-6338-01 |
|      |         |      |     |         |             |           | TCGA-HC-A8CY-01 | Y  | TCGA-V1-A9Z8-01 |
|      |         |      |     |         |             |           | TCGA-HC-7821-01 | Y  | TCGA-YL-A9WL-01 |
|      |         |      |     |         |             |           | TCGA-VP-A87C-01 | Y  | TCGA-EJ-8470-01 |
| READ | RNAseq  | RPPA | 55  | 54/202  | 43 (78.1%)  | 4 (7.2%)  | TCGA-AG-A00H-01 | Y  | TCGA-F5-6810-01 |
|      |         |      |     |         |             |           | TCGA-AG-3584-01 | Y  | TCGA-AG-4022-01 |
|      |         |      |     |         |             |           | TCGA-AG-3883-01 | Y  | TCGA-AG-4005-01 |
|      |         |      |     |         |             |           | TCGA-AG-3575-01 | Y  | TCGA-F5-6863-01 |
| SARC | RNAseq  | RPPA | 224 | 110/184 | 219 (97.7%) | 0         |                 |    |                 |
| SKCM | RNAseq  | RPPA | 352 | 128/193 | 314 (89.2%) | 2         | TCGA-EB-A44N-01 | Y  | TCGA-EB-A5UM-01 |
|      |         |      |     |         |             |           | TCGA-W3-A828-06 | Y  | TCGA-EB-A551-01 |
| STAD | RNAseq  | RPPA | 306 | 103/177 | 233 (76.1%) | 12 (3.9%) | TCGA-D7-6818-01 | Y  | TCGA-EQ-8122-01 |

|      |        |      |     |         |             |          |                 |    |                 |
|------|--------|------|-----|---------|-------------|----------|-----------------|----|-----------------|
|      |        |      |     |         |             |          | TCGA-HU-A4H3-01 | Y  | TCGA-CG-4442-01 |
|      |        |      |     |         |             |          | TCGA-SW-A7EB-01 | Y  | TCGA-CG-4460-01 |
|      |        |      |     |         |             |          | TCGA-VQ-A94P-01 | Y  | TCGA-RD-A8NB-01 |
|      |        |      |     |         |             |          | TCGA-ZA-A8F6-01 | Y  | TCGA-CG-4476-01 |
|      |        |      |     |         |             |          | TCGA-FP-8210-01 | Y  | TCGA-D7-A4Z0-01 |
|      |        |      |     |         |             |          | TCGA-HU-8244-01 | Y  | TCGA-BR-4371-01 |
|      |        |      |     |         |             |          | TCGA-HU-8604-01 | Y  | TCGA-BR-A4QL-01 |
|      |        |      |     |         |             |          | TCGA-HU-A4GJ-01 | Y  | TCGA-CD-A4MI-01 |
|      |        |      |     |         |             |          | TCGA-HU-A4H8-01 | Y  | TCGA-CG-5720-01 |
|      |        |      |     |         |             |          | TCGA-R5-A7ZI-01 | Y  | TCGA-BR-6710-01 |
|      |        |      |     |         |             |          | TCGA-VQ-A927-01 | Y  | TCGA-F1-A72C-01 |
| THCA | RNAseq | RPPA | 222 | 55/167  | 142 (63.9%) | 3 (1.3%) | TCGA-EM-A3FJ-01 | No | TCGA-EM-A2CS-06 |
|      |        |      |     |         |             |          | TCGA-DJ-A4UW-01 | No | TCGA-EL-A3CU-01 |
|      |        |      |     |         |             |          | TCGA-ET-A3BQ-01 | No | TCGA-EL-A3GR-01 |
| UCEC | RNAseq | RPPA | 300 | 115/187 | 270 (90%)   | 15 (5%)  | TCGA-AX-A05Y-01 | Y  | TCGA-AX-A060-01 |
|      |        |      |     |         |             |          | TCGA-AX-A05Z-01 | Y  | TCGA-EO-A3AV-01 |
|      |        |      |     |         |             |          | TCGA-AX-A0IW-01 | Y  | TCGA-KP-A3VZ-01 |
|      |        |      |     |         |             |          | TCGA-D1-A163-01 | Y  | TCGA-AJ-A3BH-01 |
|      |        |      |     |         |             |          | TCGA-D1-A1NZ-01 | Y  | TCGA-E6-A2P9-01 |
|      |        |      |     |         |             |          | TCGA-EO-A22T-01 | Y  | TCGA-B5-A1MW-01 |
|      |        |      |     |         |             |          | TCGA-FI-A2F9-01 | Y  | TCGA-A5-A1OH-01 |
|      |        |      |     |         |             |          | TCGA-BG-A0MQ-01 | Y  | TCGA-A5-A7WJ-01 |
|      |        |      |     |         |             |          | TCGA-BG-A0MO-01 | Y  | TCGA-BK-A13B-01 |
|      |        |      |     |         |             |          | TCGA-D1-A17A-01 | Y  | TCGA-A5-A0GB-01 |
|      |        |      |     |         |             |          | TCGA-BS-A0TE-01 | Y  | TCGA-AJ-A3EK-01 |
|      |        |      |     |         |             |          | TCGA-BS-A0UL-01 | Y  | TCGA-EO-A22T-01 |
|      |        |      |     |         |             |          | TCGA-FI-A2CX-01 | Y  | TCGA-E6-A2P8-01 |
|      |        |      |     |         |             |          | TCGA-B5-A11M-01 | No | TCGA-EY-A1GW-01 |
|      |        |      |     |         |             |          | TCGA-FI-A2D6-01 | Y  | TCGA-DF-A2KY-01 |

The **bold** indicates cross-alignments supported by other data.

655  
656  
657

658

659

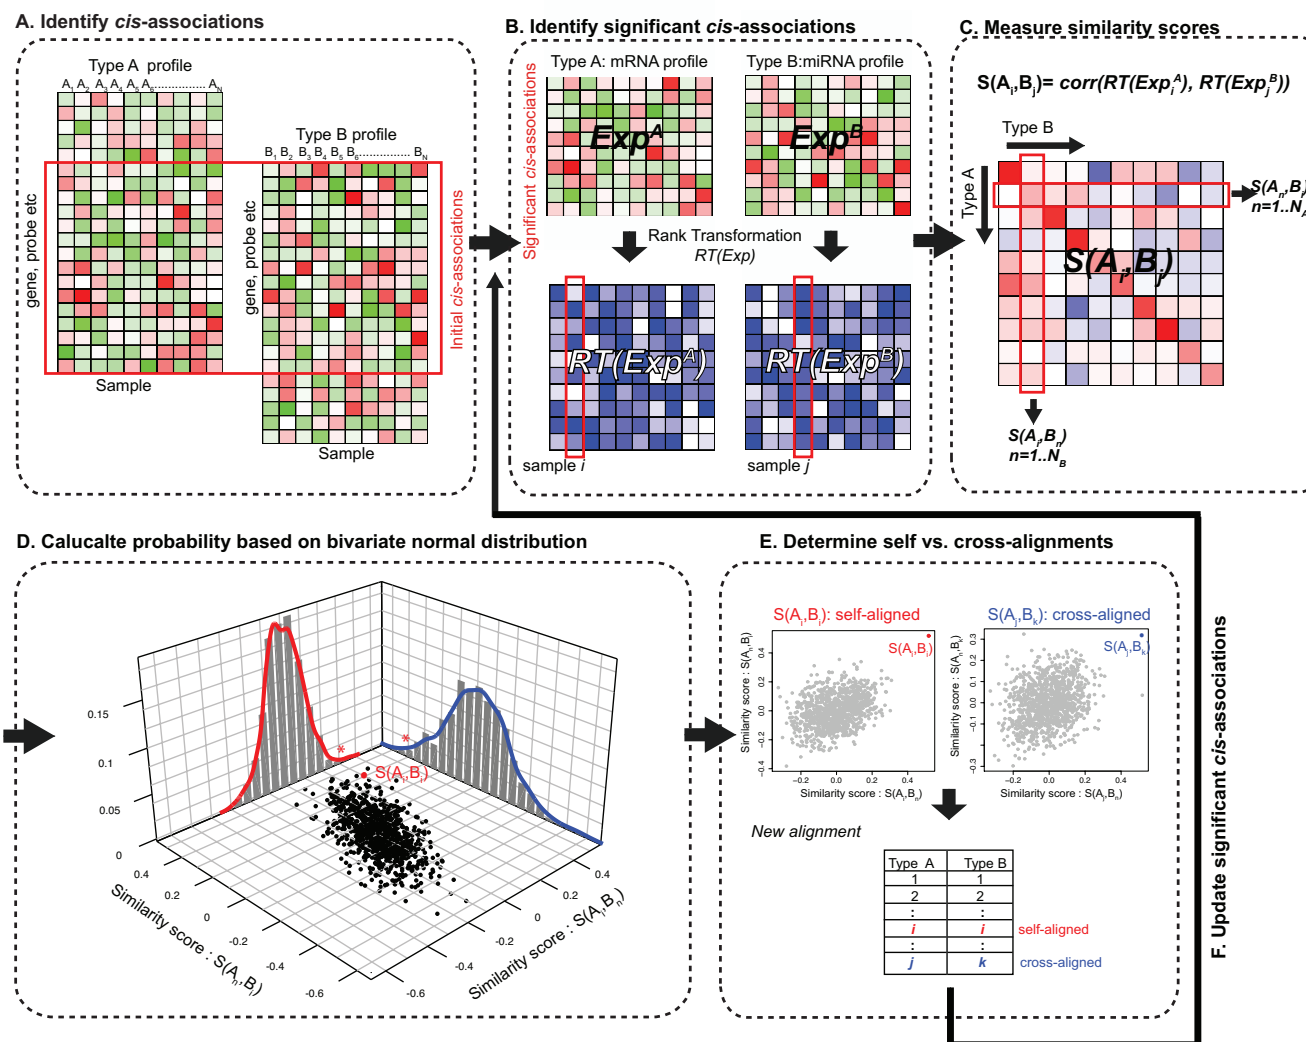

Figure 2

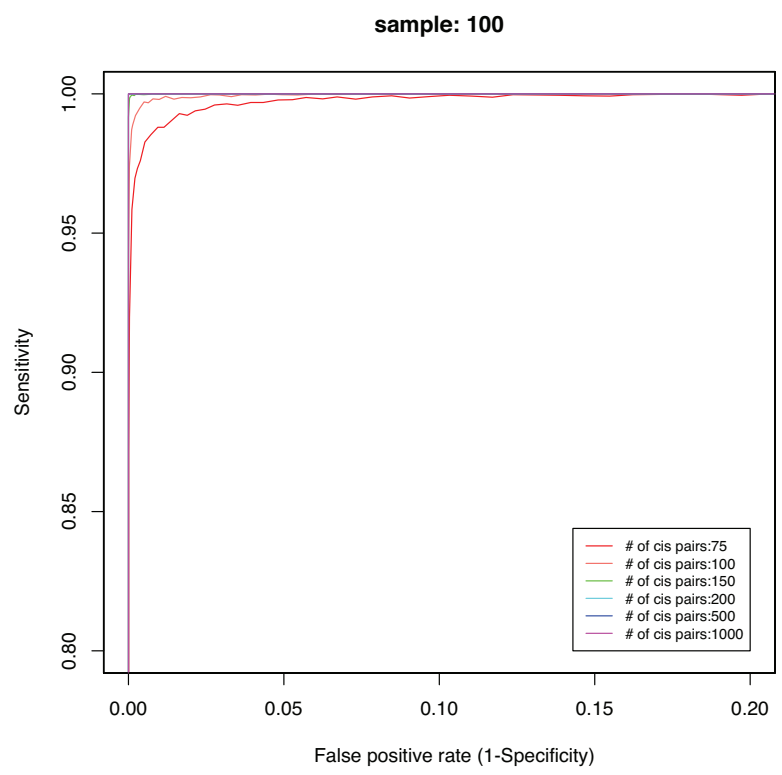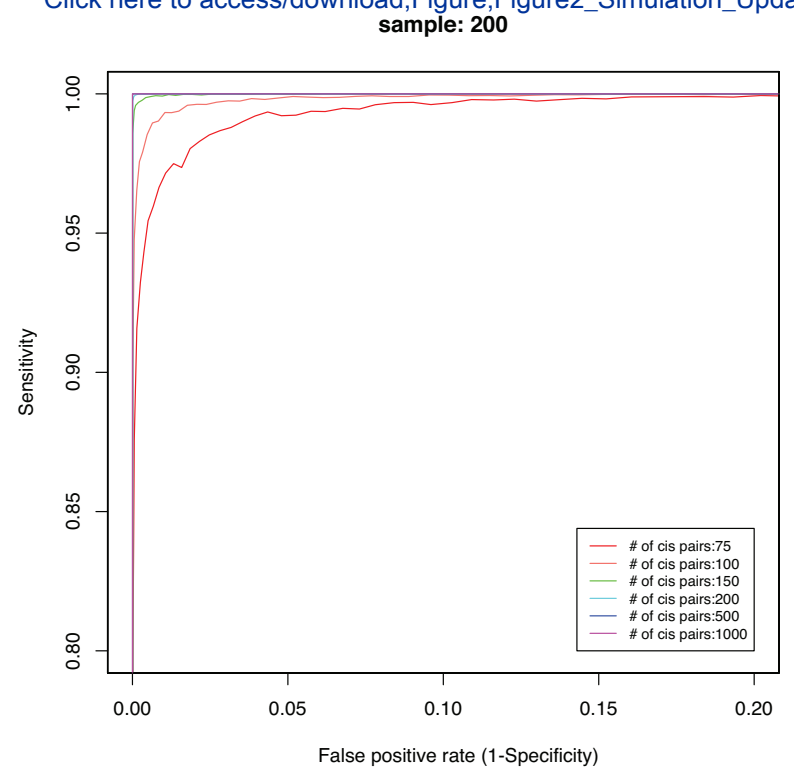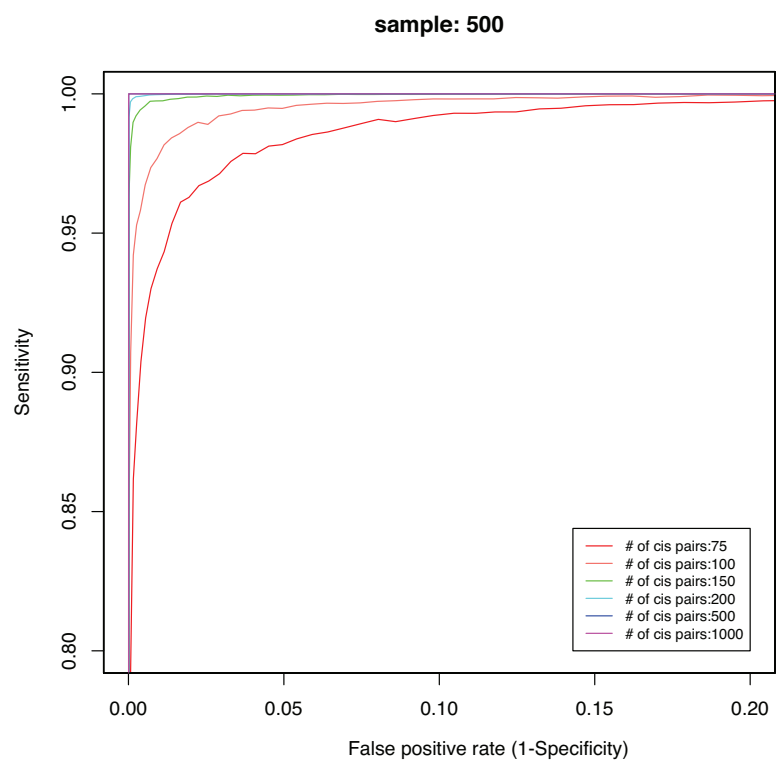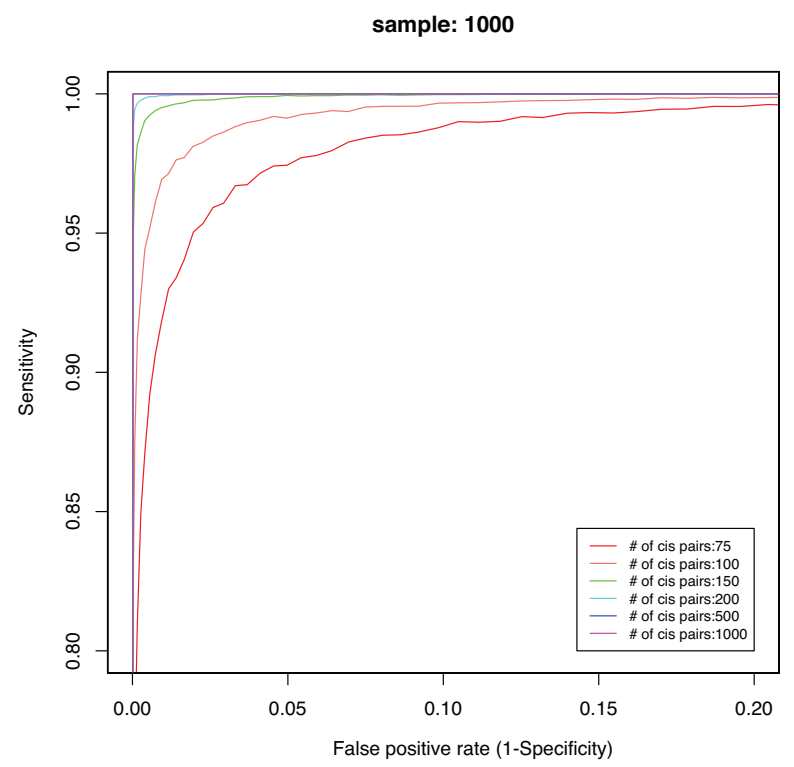



Figure 3

Click here to access/download;Figure;Figure3\_MeasurementsCompareMOD\_

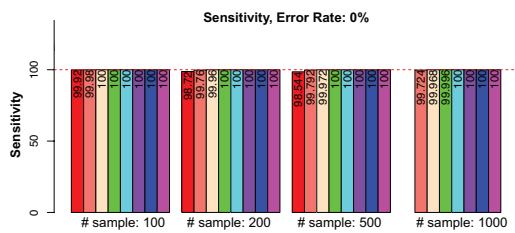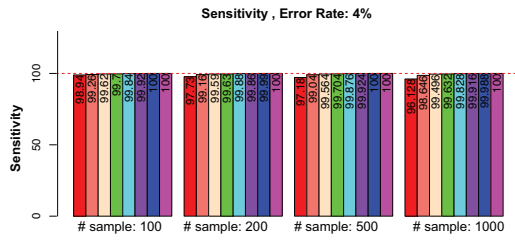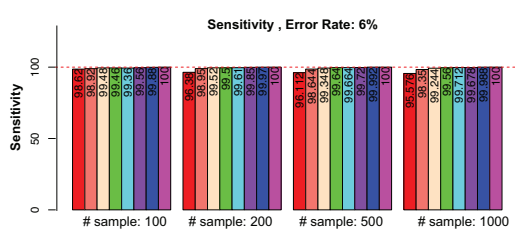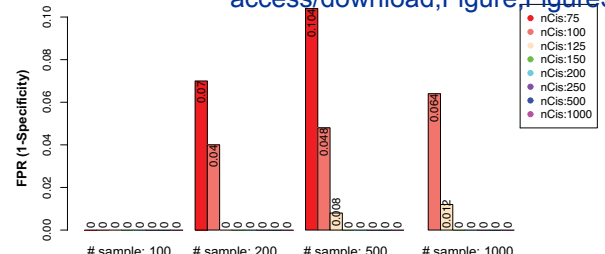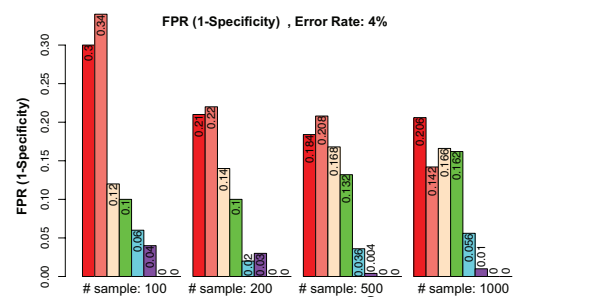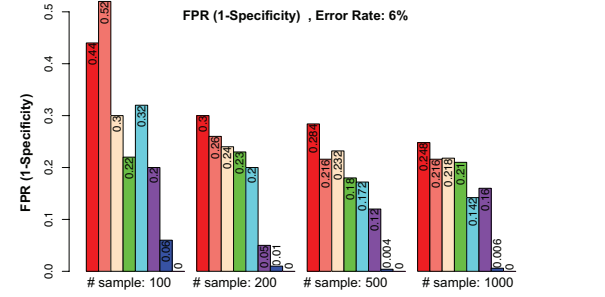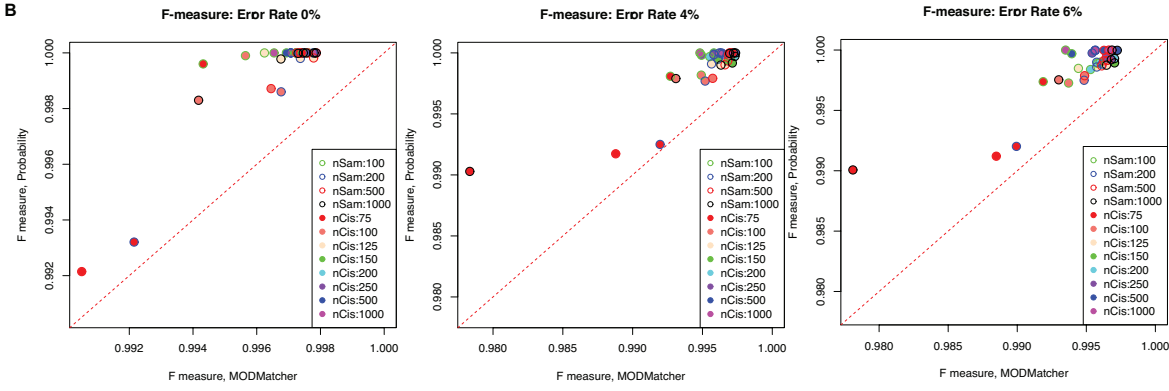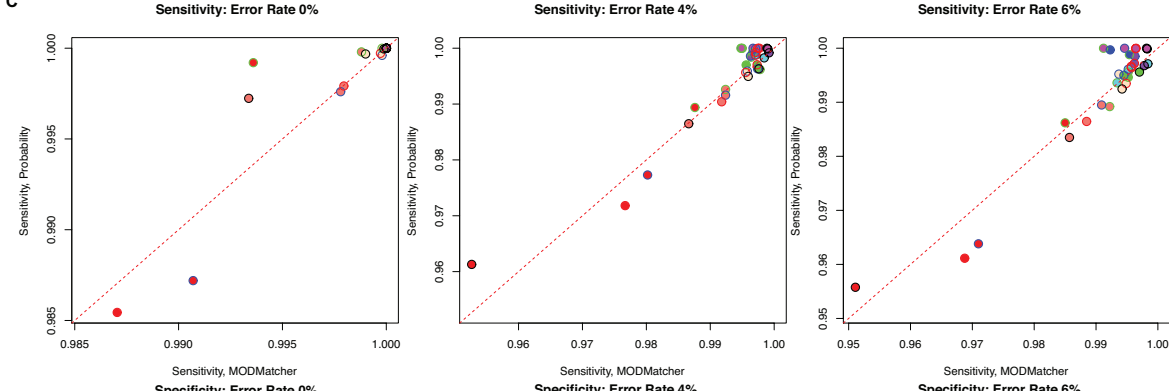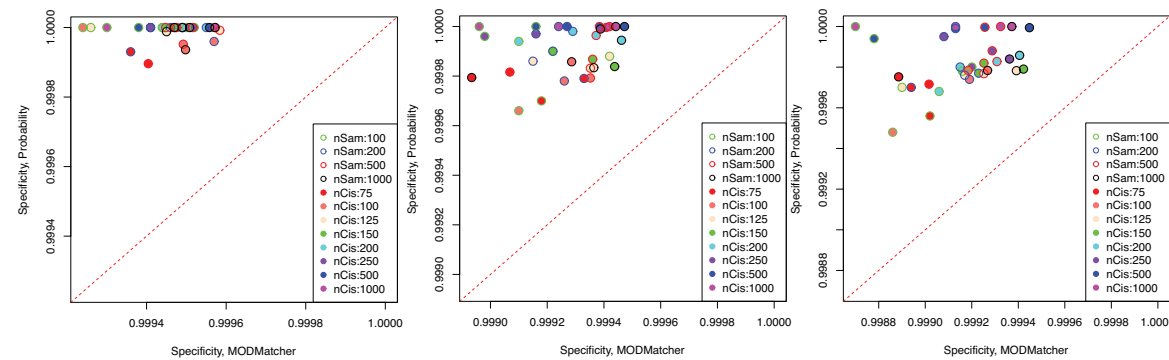

**A. Detect miRNA-host gene pair**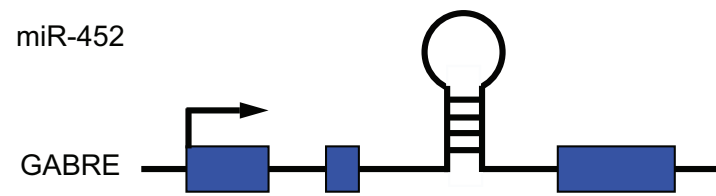**B. Identify co-transcribed miRNA-mRNA pairs**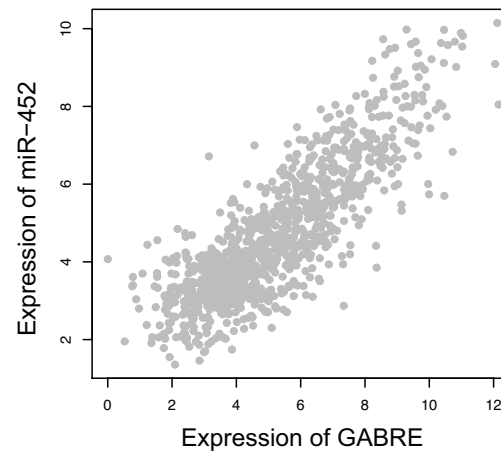**C. Rank of self-self correlation**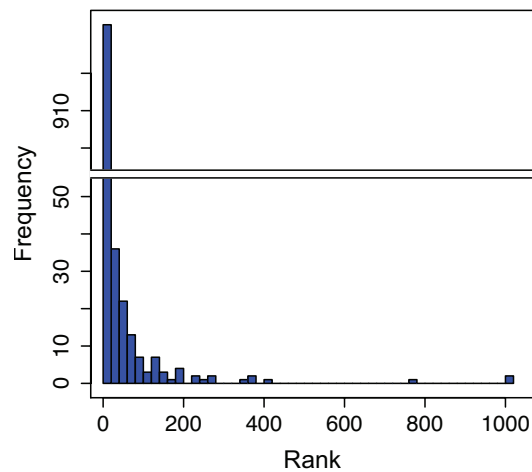**D. TCGA-D8-A1JH-01**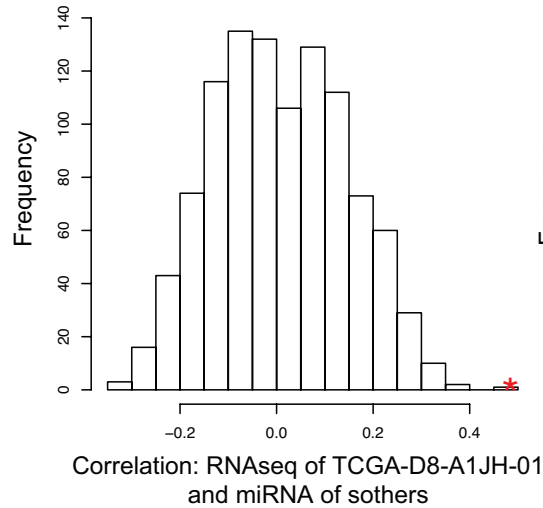**E. TCGA-B6-A0X7-01**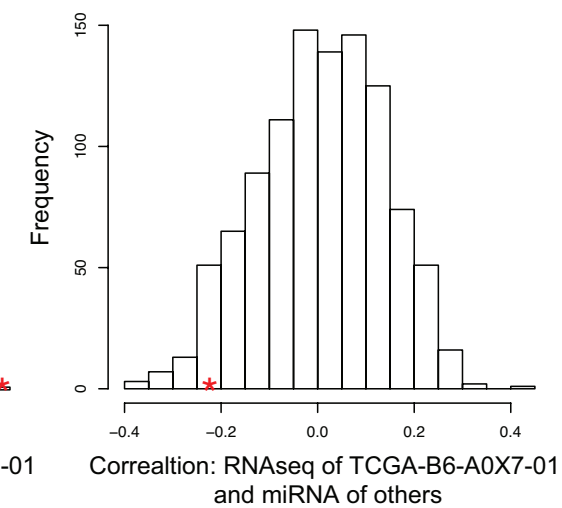**F. Probability of self-alignment**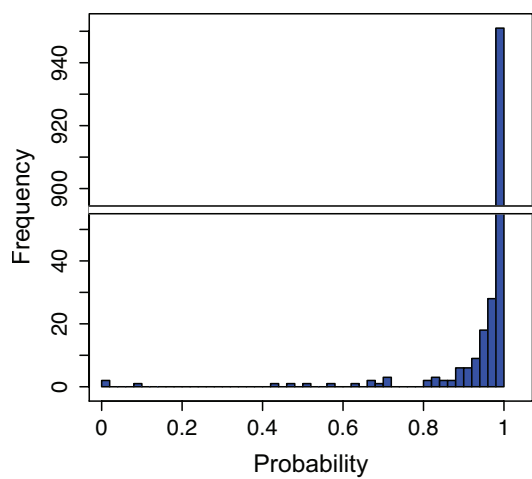**G. TCGA-OL-A6VO-01**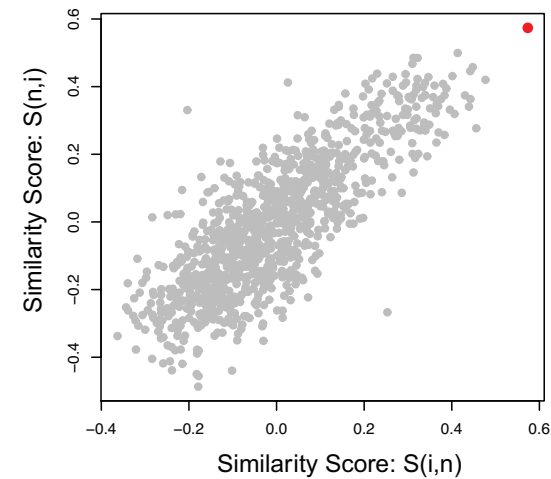**H. TCGA-AO-A128-01**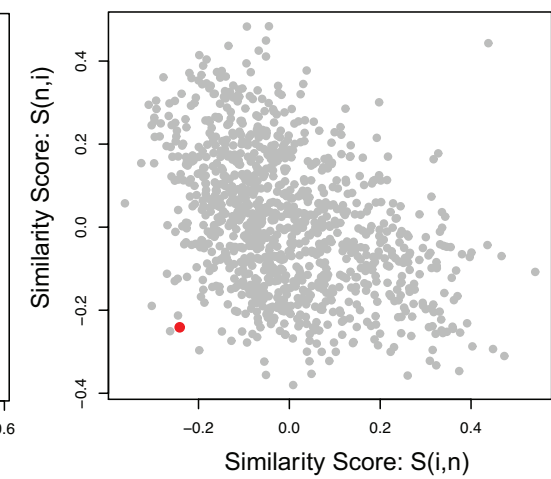

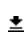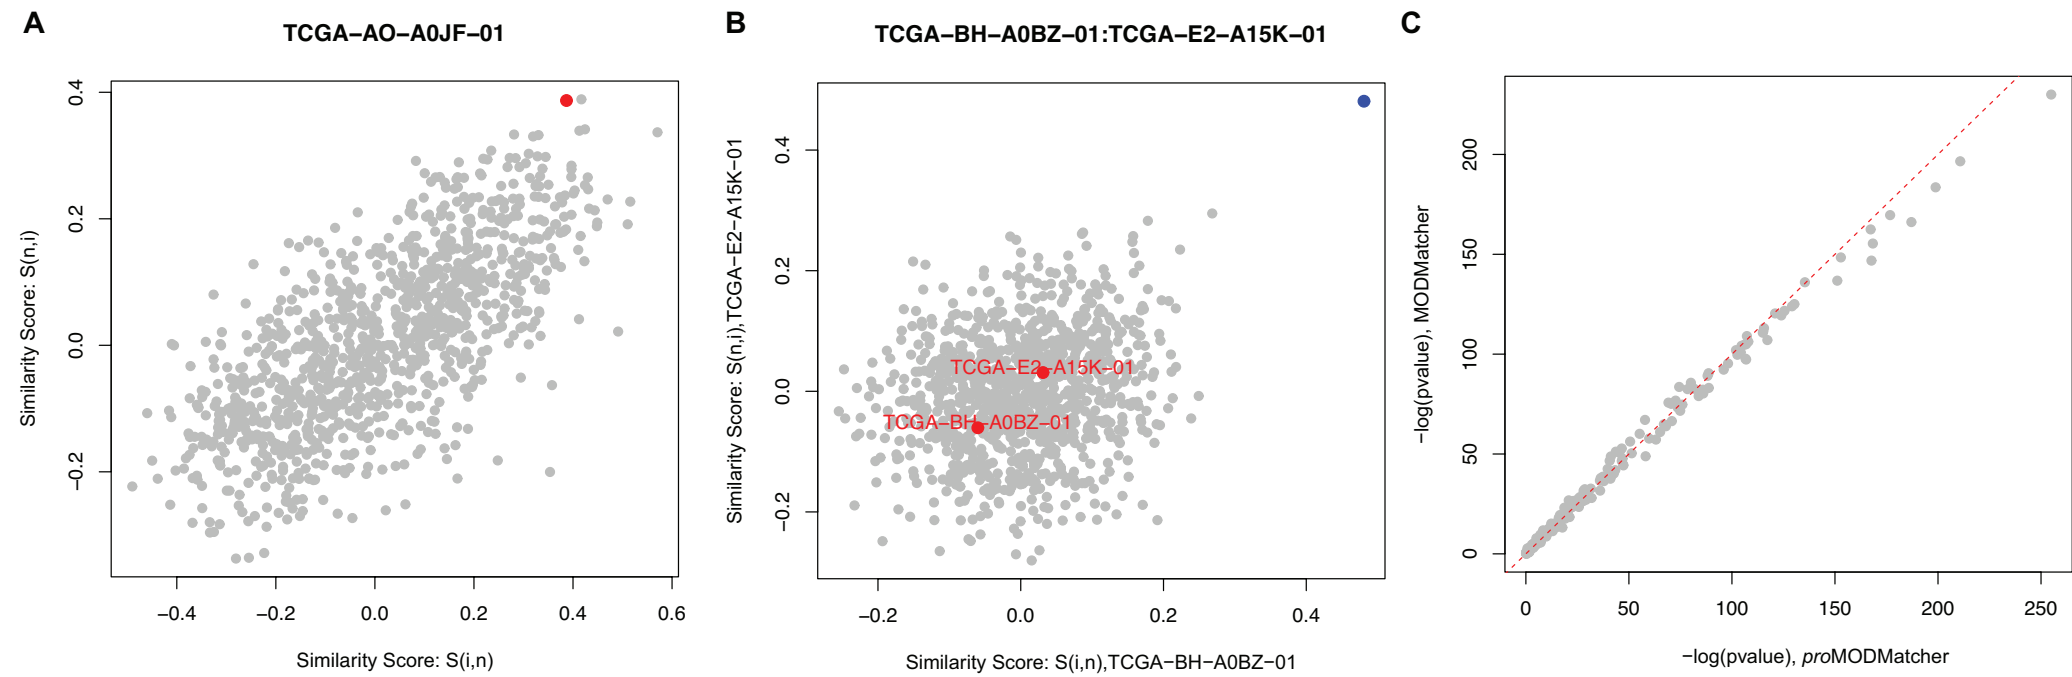

Figure 6

Click here to access/download;Figure;Figure6\_SimilarityScore\_scatterProb\_ar

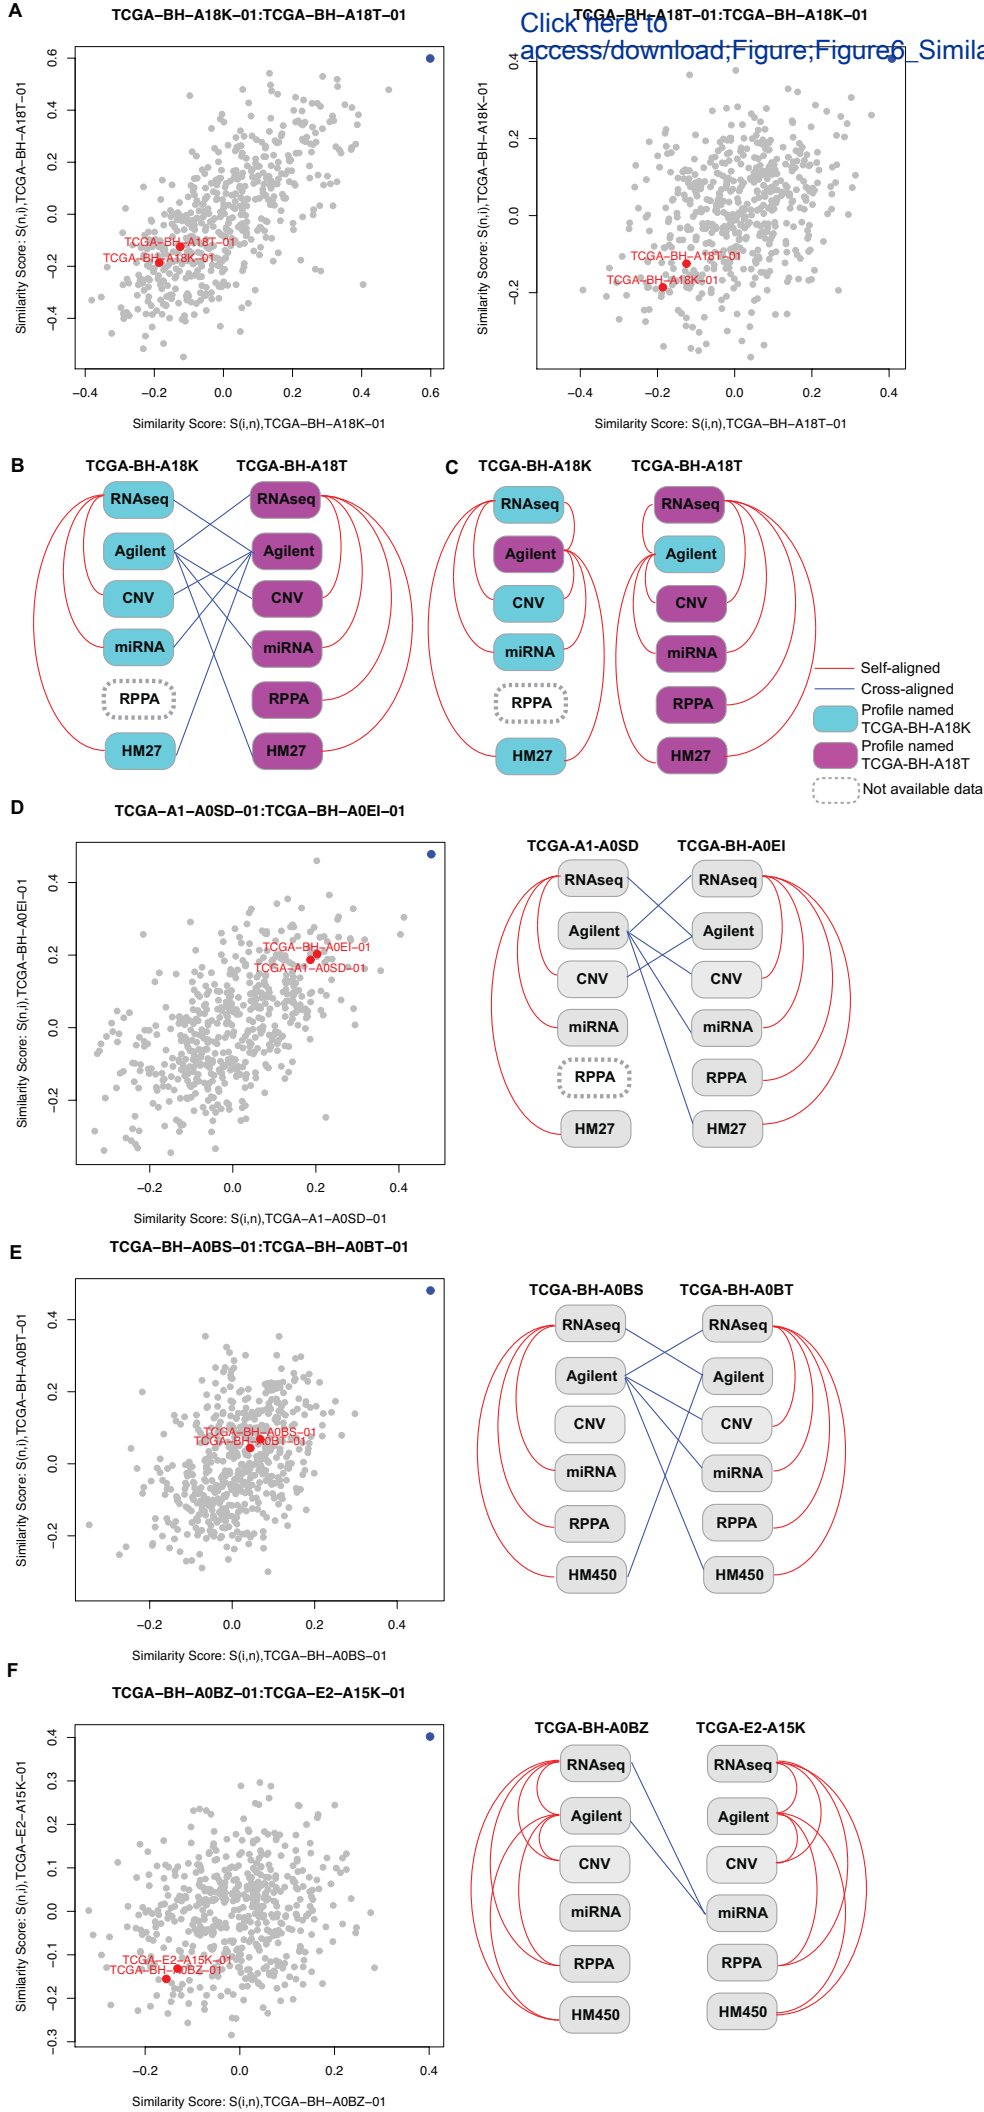

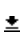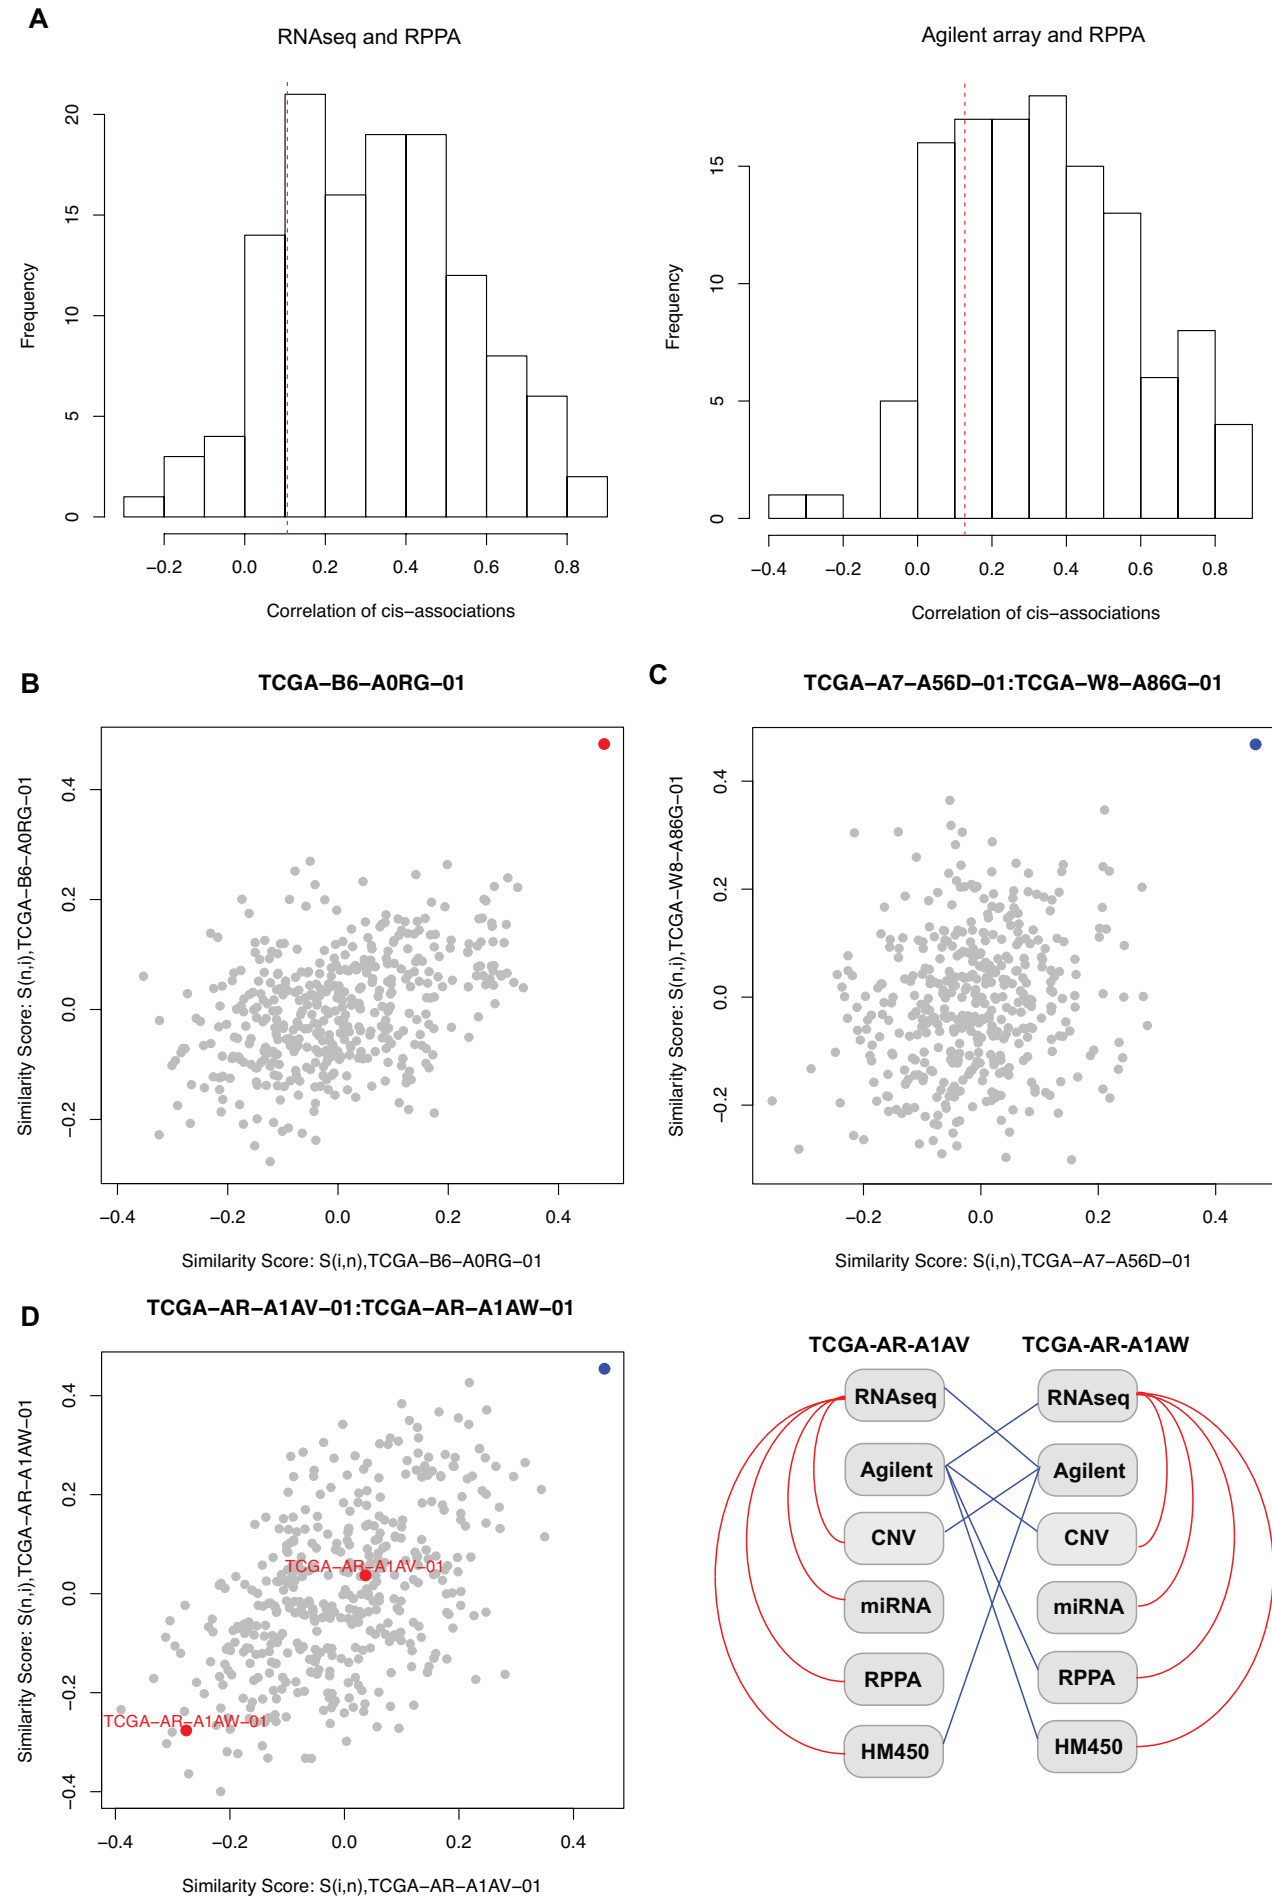

Figure 8

Click here to access/download;Figure;Figure8 CompareCorrelationAfterDisco

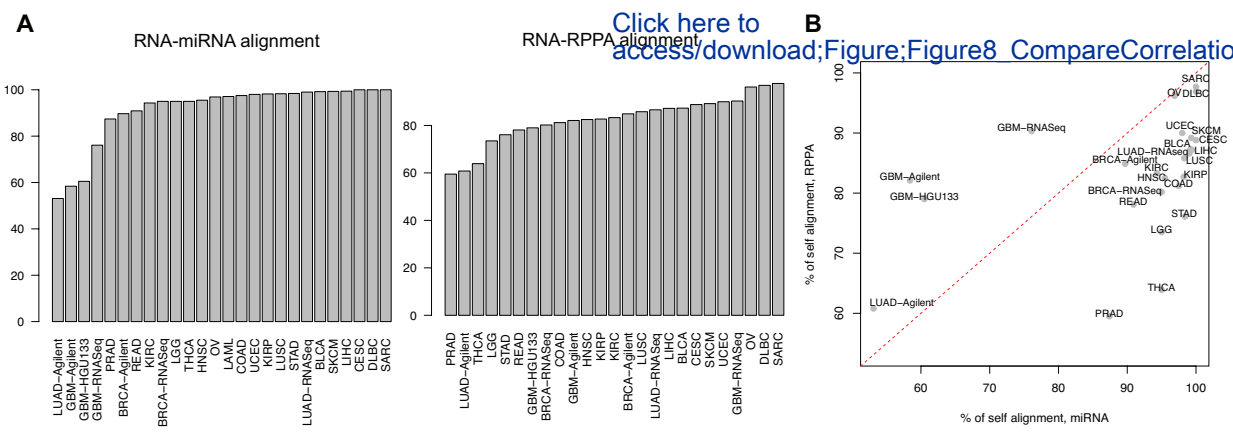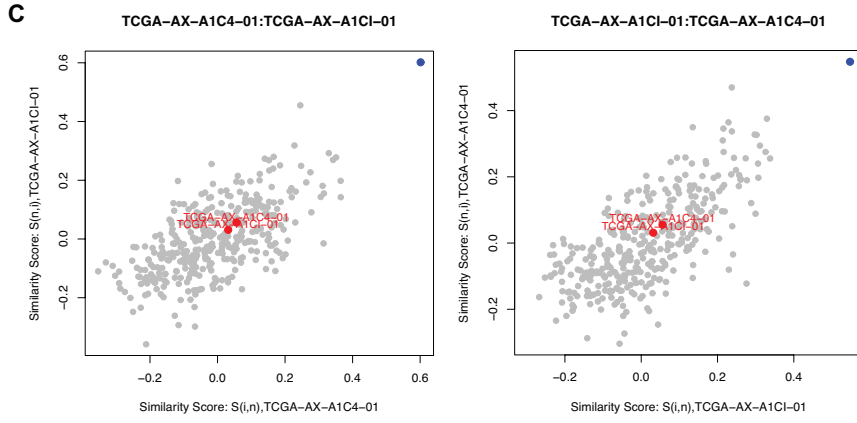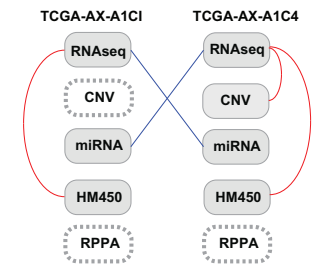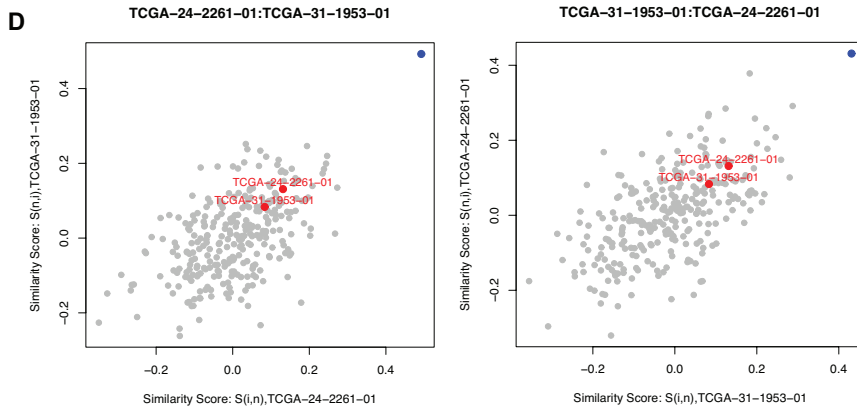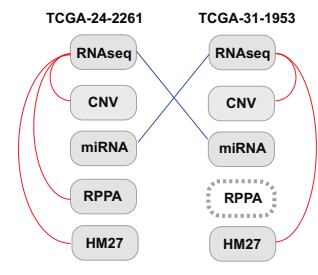

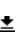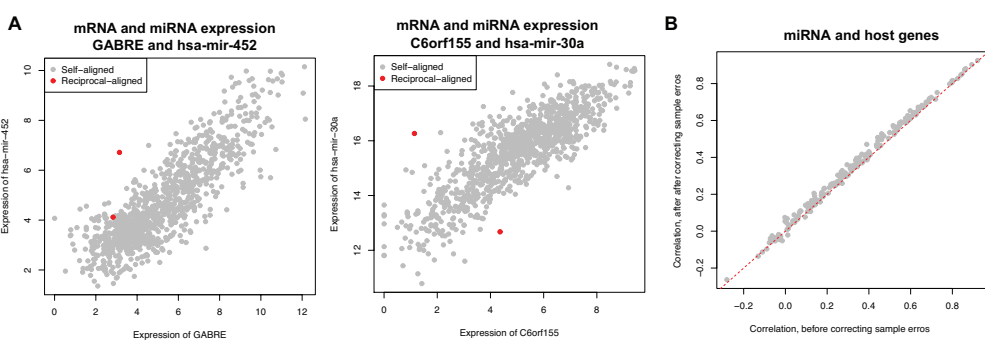

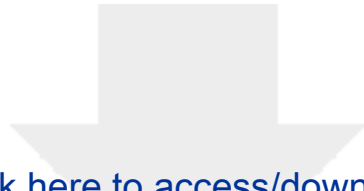

Click here to access/download

**Supplementary Material**

GigaScience\_SupplementaryMaterial.pdf

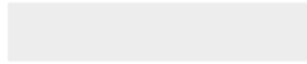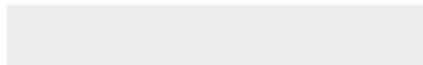

Supplement: giz080_giga-d-19-00039_original_submission.pdf [file giz080_giga-d-19-00039_original_submission.pdf]
