# Supplementary material for: A probabilistic multi-omics data matching method for detecting sample errors in integrative analysis
Source: PubMed Central journal article supplement (PMC6615984; doi:10.1093/gigascience/giz080), 2019-07-09
Supplement: giz080_giga-d-19-00039_revision_1.pdf [file giz080_giga-d-19-00039_revision_1.pdf]

# GigaScience

## A probabilistic multi-omics data matching method for detecting sample errors in integrative analysis --Manuscript Draft--

|                                                      |                                                                                                                                                                                                                                                                                                                                                                                                                                                                                                                                                                                                                                                                                                                                                                                                                                                                                                                                                                                                                                                                                                                                                                                                                                                                                                                                                                                                                                                                                    |             |
|------------------------------------------------------|------------------------------------------------------------------------------------------------------------------------------------------------------------------------------------------------------------------------------------------------------------------------------------------------------------------------------------------------------------------------------------------------------------------------------------------------------------------------------------------------------------------------------------------------------------------------------------------------------------------------------------------------------------------------------------------------------------------------------------------------------------------------------------------------------------------------------------------------------------------------------------------------------------------------------------------------------------------------------------------------------------------------------------------------------------------------------------------------------------------------------------------------------------------------------------------------------------------------------------------------------------------------------------------------------------------------------------------------------------------------------------------------------------------------------------------------------------------------------------|-------------|
| <b>Manuscript Number:</b>                            | GIGA-D-19-00039R1                                                                                                                                                                                                                                                                                                                                                                                                                                                                                                                                                                                                                                                                                                                                                                                                                                                                                                                                                                                                                                                                                                                                                                                                                                                                                                                                                                                                                                                                  |             |
| <b>Full Title:</b>                                   | A probabilistic multi-omics data matching method for detecting sample errors in integrative analysis                                                                                                                                                                                                                                                                                                                                                                                                                                                                                                                                                                                                                                                                                                                                                                                                                                                                                                                                                                                                                                                                                                                                                                                                                                                                                                                                                                               |             |
| <b>Article Type:</b>                                 | Research                                                                                                                                                                                                                                                                                                                                                                                                                                                                                                                                                                                                                                                                                                                                                                                                                                                                                                                                                                                                                                                                                                                                                                                                                                                                                                                                                                                                                                                                           |             |
| <b>Funding Information:</b>                          | National Institutes of Health (R01-AG046170)                                                                                                                                                                                                                                                                                                                                                                                                                                                                                                                                                                                                                                                                                                                                                                                                                                                                                                                                                                                                                                                                                                                                                                                                                                                                                                                                                                                                                                       | Dr. Jun Zhu |
|                                                      | National Institutes of Health (U01-HG008451)                                                                                                                                                                                                                                                                                                                                                                                                                                                                                                                                                                                                                                                                                                                                                                                                                                                                                                                                                                                                                                                                                                                                                                                                                                                                                                                                                                                                                                       | Dr. Jun Zhu |
|                                                      | National Institute of Health (U19 AI118610)                                                                                                                                                                                                                                                                                                                                                                                                                                                                                                                                                                                                                                                                                                                                                                                                                                                                                                                                                                                                                                                                                                                                                                                                                                                                                                                                                                                                                                        | Dr. Jun Zhu |
| <b>Abstract:</b>                                     | <p>Background: Data errors, including sample swapping and mis-labeling are inevitable in the process of large-scale omics data generation. Data errors need to be identified and corrected before integrative data analyses where different types of data are merged based on the annotated labels. Data with labeling errors dampen true biological signals. More importantly, data analysis with sample errors could lead to wrong scientific conclusions. We developed a robust probabilistic multi-omics data matching procedure, proMODMatcher, to curate data, identify and correct data annotation and errors in large databases.</p> <p>Results: Application to simulated datasets suggests that proMODMatcher achieved robust statistical power even when the number of cis-associations was small and/or the number of samples was large. Application of our proMODMatcher to multi-omics datasets in The Cancer Genome Atlas (TCGA) and International Cancer Genome Consortium (ICGC) identified sample errors in multiple cancer datasets. Our procedure was not only able to identify sample labeling errors but also to unambiguously identify the source of the errors. Our results demonstrate that these errors should be identified and corrected before integrative analysis.</p> <p>Conclusions: Our results indicate that sample labeling errors were common in large multi-omics datasets. These errors should be corrected before integrative analysis.</p> |             |
| <b>Corresponding Author:</b>                         | Jun Zhu<br>Icahn School of Medicine at Mount Sinai<br>UNITED STATES                                                                                                                                                                                                                                                                                                                                                                                                                                                                                                                                                                                                                                                                                                                                                                                                                                                                                                                                                                                                                                                                                                                                                                                                                                                                                                                                                                                                                |             |
| <b>Corresponding Author Secondary Information:</b>   |                                                                                                                                                                                                                                                                                                                                                                                                                                                                                                                                                                                                                                                                                                                                                                                                                                                                                                                                                                                                                                                                                                                                                                                                                                                                                                                                                                                                                                                                                    |             |
| <b>Corresponding Author's Institution:</b>           | Icahn School of Medicine at Mount Sinai                                                                                                                                                                                                                                                                                                                                                                                                                                                                                                                                                                                                                                                                                                                                                                                                                                                                                                                                                                                                                                                                                                                                                                                                                                                                                                                                                                                                                                            |             |
| <b>Corresponding Author's Secondary Institution:</b> |                                                                                                                                                                                                                                                                                                                                                                                                                                                                                                                                                                                                                                                                                                                                                                                                                                                                                                                                                                                                                                                                                                                                                                                                                                                                                                                                                                                                                                                                                    |             |
| <b>First Author:</b>                                 | Eunjee Lee                                                                                                                                                                                                                                                                                                                                                                                                                                                                                                                                                                                                                                                                                                                                                                                                                                                                                                                                                                                                                                                                                                                                                                                                                                                                                                                                                                                                                                                                         |             |
| <b>First Author Secondary Information:</b>           |                                                                                                                                                                                                                                                                                                                                                                                                                                                                                                                                                                                                                                                                                                                                                                                                                                                                                                                                                                                                                                                                                                                                                                                                                                                                                                                                                                                                                                                                                    |             |
| <b>Order of Authors:</b>                             | Eunjee Lee                                                                                                                                                                                                                                                                                                                                                                                                                                                                                                                                                                                                                                                                                                                                                                                                                                                                                                                                                                                                                                                                                                                                                                                                                                                                                                                                                                                                                                                                         |             |
|                                                      | Seungyeul Yoo                                                                                                                                                                                                                                                                                                                                                                                                                                                                                                                                                                                                                                                                                                                                                                                                                                                                                                                                                                                                                                                                                                                                                                                                                                                                                                                                                                                                                                                                      |             |
|                                                      | Wenhui Wang                                                                                                                                                                                                                                                                                                                                                                                                                                                                                                                                                                                                                                                                                                                                                                                                                                                                                                                                                                                                                                                                                                                                                                                                                                                                                                                                                                                                                                                                        |             |
|                                                      | Zhidong Tu                                                                                                                                                                                                                                                                                                                                                                                                                                                                                                                                                                                                                                                                                                                                                                                                                                                                                                                                                                                                                                                                                                                                                                                                                                                                                                                                                                                                                                                                         |             |
|                                                      | Jun Zhu                                                                                                                                                                                                                                                                                                                                                                                                                                                                                                                                                                                                                                                                                                                                                                                                                                                                                                                                                                                                                                                                                                                                                                                                                                                                                                                                                                                                                                                                            |             |
| <b>Order of Authors Secondary Information:</b>       |                                                                                                                                                                                                                                                                                                                                                                                                                                                                                                                                                                                                                                                                                                                                                                                                                                                                                                                                                                                                                                                                                                                                                                                                                                                                                                                                                                                                                                                                                    |             |
| <b>Response to Reviewers:</b>                        | We have thoroughly addressed all reviewers' comments pertaining to our manuscript "A probabilistic multi-omics data matching method for detecting sample errors in integrative analysis". Detailed responses are listed in the "Response to reviewers                                                                                                                                                                                                                                                                                                                                                                                                                                                                                                                                                                                                                                                                                                                                                                                                                                                                                                                                                                                                                                                                                                                                                                                                                              |             |

|                                                                                                                                                                                                                                                                                                                                                                                                                                                                                                                                     |                   |
|-------------------------------------------------------------------------------------------------------------------------------------------------------------------------------------------------------------------------------------------------------------------------------------------------------------------------------------------------------------------------------------------------------------------------------------------------------------------------------------------------------------------------------------|-------------------|
|                                                                                                                                                                                                                                                                                                                                                                                                                                                                                                                                     | comments" letter. |
| <b>Additional Information:</b>                                                                                                                                                                                                                                                                                                                                                                                                                                                                                                      |                   |
| <b>Question</b>                                                                                                                                                                                                                                                                                                                                                                                                                                                                                                                     | <b>Response</b>   |
| Are you submitting this manuscript to a special series or article collection?                                                                                                                                                                                                                                                                                                                                                                                                                                                       | No                |
| <p><b>Experimental design and statistics</b></p> <p>Full details of the experimental design and statistical methods used should be given in the Methods section, as detailed in our <a href="#">Minimum Standards Reporting Checklist</a>. Information essential to interpreting the data presented should be made available in the figure legends.</p> <p>Have you included all the information requested in your manuscript?</p>                                                                                                  | Yes               |
| <p><b>Resources</b></p> <p>A description of all resources used, including antibodies, cell lines, animals and software tools, with enough information to allow them to be uniquely identified, should be included in the Methods section. Authors are strongly encouraged to cite <a href="#">Research Resource Identifiers</a> (RRIDs) for antibodies, model organisms and tools, where possible.</p> <p>Have you included the information requested as detailed in our <a href="#">Minimum Standards Reporting Checklist</a>?</p> | Yes               |
| <p><b>Availability of data and materials</b></p> <p>All datasets and code on which the conclusions of the paper rely must be either included in your submission or deposited in <a href="#">publicly available repositories</a> (where available and ethically appropriate), referencing such data using a unique identifier in the references and in the "Availability of Data and Materials" section of your manuscript.</p>                                                                                                      | Yes               |

Have you have met the above requirement as detailed in our [Minimum Standards Reporting Checklist](#)?



24 **Abstract**

25 **Background:** Data errors, including sample swapping and mis-labeling are inevitable in the  
26 process of large-scale omics data generation. Data errors need to be identified and corrected  
27 before integrative data analyses where different types of data are merged based on the  
28 annotated labels. Data with labeling errors dampen true biological signals. More importantly,  
29 data analysis with sample errors could lead to wrong scientific conclusions. We developed a  
30 robust *probabilistic* multi-omics data matching procedure, *proMODMatcher*, to curate data,  
31 identify and correct data annotation and errors in large databases.

32 **Results:** Application to simulated datasets suggests that *proMODMatcher* achieved robust  
33 statistical power even when the number of cis-associations was small and/or the number of  
34 samples was large. Application of our *proMODMatcher* to multi-omics datasets in The Cancer  
35 Genome Atlas (TCGA) and International Cancer Genome Consortium (ICGC) identified sample  
36 errors in multiple cancer datasets. Our procedure was not only able to identify sample labeling  
37 errors but also to unambiguously identify the source of the errors. Our results demonstrate that  
38 these errors should be identified and corrected before integrative analysis.

39 **Conclusions:** Our results indicate that sample labeling errors were common in large multi-  
40 omics datasets. These errors should be corrected before integrative analysis.

41

42

43 **Keywords:** data error, omics data integration, and data curation

44

45

46

## 47 **Background**

48 With advances in high throughput technologies in the past two decades, diverse types of omics  
49 data at multiple layers of regulation have been generated to survey complex human diseases  
50 [1-3], which arise from dysregulations of interplays among these multiple layers of regulations  
51 including genetics, epigenetics, transcriptomics, metabolomics, glycomics, and proteomics.  
52 Therefore, integration of multi-omics data at multiple layers of regulation is essential to derive a  
53 holistic view of molecular mechanisms underlying complex human disease. Previous studies  
54 have shown that simultaneously considering diverse types of biological data result in more  
55 complete understandings of biological systems [4-6].

56 Recently, many large projects, such as The Cancer Genome Atlas (TCGA) and  
57 International Cancer Genome Consortium (ICGC), have generated diverse types of omics data  
58 for public use. However, data errors, including sample swapping, mis-labeling, and improper  
59 data entry are almost inevitable in the process of large-scale data generation and management.  
60 Westra *et al.* [7] showed that there is about 20% of mis-matched samples between genotype  
61 and gene expression data. Yoo *et al.* [8] demonstrated that sample labeling errors occurred in  
62 almost every database examined. Also, there are studies to identify cross-individual  
63 contamination in next-generation sequencing data from TCGA samples [9, 10].

64 Identifying and ultimately correcting these sample errors are critical for statistical data  
65 analysis, especially for integrative analysis. Data errors need to be identified and corrected  
66 before extensive efforts being devoted to data analysis. Analyzing data with sample errors is a  
67 waste of limited public resources. More importantly, data analysis with sample errors could lead  
68 to wrong scientific conclusions. Furthermore, sample errors have more significant effect on  
69 integrative data analysis where different types of data are merged based on the annotated  
70 labels. Some types of sample errors can be detected during data quality control (QC) on each

71 individual type of data, whereas sample errors including sample swapping, or mis-labeling are  
72 elusive to be detected by data QC on individual type of data alone.

73         Previously, we developed sample mapping procedure called MODMatcher (Multi-Omics  
74 Data matcher) [8], which is not only able to identify mis-matched omics profile pairs, but also to  
75 properly map them to correct samples based on other omics data. The main idea is first to  
76 identify “biological *cis*-associations” between two types of omics data, and then to use these  
77 “biological *cis*-associations” as intrinsic barcodes to match different types of omics data. The  
78 types of “biological *cis*-associations” are different when different pairs of omics data are mapped,  
79 but they all reflect general biological regulations. For example, when mapping genotype and  
80 gene expression data, the method is based on *cis*-genetic regulation of expression traits (or  
81 expression quantitative trait loci—*cis*-eQTLs), where a genetic polymorphism at a gene’s  
82 promotor or regulatory region affects transcription factors or co-factors binding, which in turn  
83 affects the abundance of the gene’s transcript [11]. Similarly, when mapping methylation and  
84 gene expression data, the method leverages on *cis*-methylation regulation of expression traits  
85 (or *cis*-methylys), where high DNA methylation level of CpGs at a gene’s promotor or regulatory  
86 region hinders transcription factors or co-factors binding, which in turn represses the gene’s  
87 transcription [12]. More on “biological *cis*-associations” are detailed in the Methods section.

88         We demonstrated that the statistical power to identify biological signals increases after  
89 database cleaning by applying the MODMatcher procedure to multiple large-scale public multi-  
90 omics datasets from LGRC and TCGA. The power of MODMatcher depends on the number of  
91 intrinsic biological *cis*-associations that can be identified. The power of MODMatcher  
92 decreases when the number of *cis*-associations between two omics profiles is small. However,  
93 in some cases (a few examples are detailed in the Results), the number of possible intrinsic  
94 biological *cis*-associations is small, new methods are needed for these types of applications.

95 In this study, we extended MODMatcher and developed a robust *probabilistic* multi-  
96 omics data matching procedure, *proMODMatcher*, to curate data, identify and unambiguously  
97 correct data annotation and metadata attribute errors in large databases. First, we applied the  
98 *proMODMatcher* to simulated datasets to assess the statistical power of our procedure. Results  
99 suggest that *proMODMatcher* achieved robust statistical power even when the number of cis-  
100 associations was small and/or the number of samples was large. Next, we applied the  
101 *proMODMatcher* procedure to multiple large-scale publicly available multi-omics datasets from  
102 TCGA, and in particular, focused on the omics profiles that have small numbers of intrinsic *cis*-  
103 associations including miRNA expression and Reverse Phase Protein Array (RPPA).  
104 Additionally, we applied *proMODMatcher* to large-scale publicly available multi-omics datasets  
105 in ICGC. Our results indicate that sample labeling errors were common in large multi-omics  
106 datasets. These errors should be corrected before integrative analysis.

107

## 108 **Data Description**

### 109 **TCGA datasets**

110 For the TCGA breast invasive carcinoma (BRCA) dataset, level 3 data of gene expression, DNA  
111 methylation, miRNA expression and CNV was downloaded from Genomic Data Commons  
112 (GDC) data portal (<https://portal.gdc.cancer.gov/>). For gene expression profiles,  
113 IlluminaHiSeq\_RNASeqV2 and AgilentG4502A platform were used. Illumina  
114 HumanMethylation27 (HM27) and HumanMethylation450 (HM450) Beadchip were used for  
115 DNA methylation bisulfide sequencing. IlluminaHiSeq\_miRNASeq and IlluminaGA\_miRNASeq  
116 platforms were used to profile miRNA expression. Affymetrix Genome-Wide Human SNP Array  
117 6.0 was used for copy number variation. The protein expression levels were measured in  
118 Reverse Phase Protein Array (RPPA), and downloaded. Each of level 3 profiles was



119 reformatted for matrix of row with gene (or probes) and column with barcodes of samples. For  
120 methylation profiles and CNV, the probes or segments were mapped to hg19 gene symbols.  
121 Different profiles were initially matched according to their barcodes. The mapping files of  
122 HM450, RPPA, and miRNA are available in the source code.

123 For other types of cancers in TCGA, we downloaded gene expression, miRNA  
124 expression, CNV, DNA methylation, and RPPA data from firehose database  
125 <https://gdac.broadinstitute.org/>. For RPPA data, we filtered genes with more than 25% of  
126 samples with not-assigned measurements.

127

### 128 **ICGC datasets**

129 For the ICGC datasets, the pre-processed data were downloaded from ICGC data portal  
130 (<https://dcc.icgc.org/>). We selected datasets with more than one available types of omics data  
131 including mRNA expression profiles (i.e. RNAseq and Array), DNA methylation profiles based  
132 on Illumina HumanMethylation450 (HM450), miRNA expression profiles, and copy number  
133 somatic mutation profiles. Each of profiles was reformatted into a matrix with genes (or probes)  
134 as rows and barcodes of samples as columns. The gene and miRNA expression profiles were  
135 log2 transformed and normalized by quantile normalization[13]. For copy number somatic  
136 mutation profiles, the segments were mapped to hg19 gene symbols. Some datasets contain  
137 very sparse segment information for copy number somatic mutation profiles such as CLLE-ES.  
138 We excluded these copy number profiles for further analysis. For methylation profiles, the  
139 probes were mapped to hg19 gene symbols.

140

### 141 **Simulation study**

142 Simulated data sets for testing alignment between a pair of omics profiles were generated.

143 Given a set of  $N$  *cis*-associations and each of correlation coefficient  $r_n$ , we can simulate omics  
144 profiles  $Y$  based on omics profiles  $X$  for  $M$  samples as following:  $X_i = N(0,1)$  is a standard  
145 normal distribution, and  $\gamma_i = \frac{r_n}{\sqrt{1-r_n^2}}X_i + \epsilon$ , where  $\epsilon$  is standard normal distribution,  $N(0,1)$ . For  
146 each  $N$  and  $M$  combination, we simulated  $N$  significant sets with  $r_n$  drawn from a truncated  
147 normal distribution with a cutoff value corresponding to correlation coefficients q-value  $< 0.05$ ,  
148 as well as 2000 sets of random  $r_n$  drawn from a normal distribution. We considered  $N$  significant  
149 *cis*-associations from 75 through 1000, and  $M$  samples from 100 through 1000. The simulated  
150 data with label error were generated by permuting the labels of one type of data. We considered  
151 0, 2, .. 10% label error rates. We measured sensitivity (i.e. recall)  $= \frac{\#truly\ aligned\ pairs}{\#simulated\ pairs}$ , specificity  
152 (i.e. precision)  $= \frac{\#truly\ aligned\ pairs}{\#align\ pairs}$ , false positive rate (FPR)=1-specificity, and F measures ( $= 2 \times$   
153  $\frac{precision \times recall}{precision + recall}$ ) for assessment. Additionally, because a pair of omics profiles mostly has  
154 unbalanced samples, we mimics this by adding 10% of  $M$  samples for type A and type B omics  
155 profiles.

156

## 157 **Analyses**

### 158 **Overview of proMODMatcher procedure**

159 *proMODMatcher* followed the general framework of multi-omics data matching of the previous  
160 study [8]. Two types of data (or profiles) (i.e. Type A and Type B in **Figure 1**) were matched  
161 based on their *cis*-associations. Samples were initially matched based on annotated sample ID  
162 and potential *cis*-associations (**Figure 1A**). The significant *cis*-associations from two different  
163 data types were identified by the Spearman correlations (**Figure 1B**). The data for each *cis*-  
164 association was normal rank-transformed (**Figure 1B**). The profile similarity between the two

165 types of data  $S(A_i, B_j)$  is defined as the correlation between profile  $i$  of type A and profile  $j$  of  
166 type B (**Figure 1C**). The probability of a match between profile  $i$  of type A and profile  $j$  of type B  
167 is estimated by evaluating a similarity score in a bivariate normal distribution (**Figure 1D**).  
168 Based on probability of a match, *proMODMatcher* determines self- or cross-alignments for each  
169 match. First, profile pairs matched by annotated sample IDs were checked whether their  
170 similarity scores were high (**Figure 1D**) to be annotated as “self-aligned”. If not, additional steps  
171 were applied to find any potential matches among other unmatched profiles (**Figure 1E**). The  
172 matched profile pairs were then used to update significant *cis*-associations. We iteratively  
173 refined profile alignment and rounds of alignments were repeated until there were no further  
174 updates (**Figure 1F**).

175

## 176 **Simulation studies**

177 Numbers of significant *cis*-associations and samples are two important deterministic factors of  
178 similarity scores as well as the accuracy of omics profile alignment results. To investigate the  
179 effect of numbers of samples and *cis*-associations, we simulated data sets with different  
180 numbers of samples and significant *cis*-associations and applied MODMatcher and  
181 *proMODMatcher* to the simulated data sets. For MODMatcher, when the number of *cis*-  
182 associations was >200, almost all profile pairs could be aligned at high accuracy (false positive  
183 rate vs. sensitivity) (**Figure 2**). The similarity scores of matched pairs based on a low number of  
184 *cis*-associations were more variable resulting in lower accuracies (**Supplementary Figure S1**).  
185 This result indicates that the MODMatcher can be applied to align the omics profile pairs with  
186 >200 *cis*-associations, such as methylation-mRNA profiles with over 7000 intrinsic *cis*-  
187 associations and mRNA-CNV profiles with over 10,000 intrinsic *cis*-associations [8]. On the  
188 other hand, when the number of *cis*-associations was around 200 or below, the accuracy of

189 sample alignments dropped as the number of samples increased (**Figure 2**). When aligning  
190 gene expression profiles with miRNA or RPPA profiles, the number of candidate intrinsic cis-  
191 associations was small (detailed below). Thus, MODMatcher was not powered to accurately  
192 align these types of profile pairs.

193 The *pro*MODMatcher was applied to the same simulated datasets and was able to  
194 achieve high sensitivities and low FPRs across a wide range of numbers of *cis*-associations and  
195 samples (**Figure 3A**). When compared with MODMatcher's results, *pro*MODMatcher resulted in  
196 better accuracies (F measure in **Figure 3B**), similar sensitivities (**Figure 3C**), and better  
197 specificities (**Figure 3D**).

198 We further investigated their performances when there were labeling errors. Datasets  
199 with sample labeling errors (i.e. 4% and 6%) were simulated by randomly assigning some  
200 samples' labels, then *pro*MODMatcher and MODMatcher were applied to identify aligned profile  
201 pairs. As expected, when a larger number of *cis*-associations was available, *pro*MODMatcher  
202 achieved a high sensitivity and low FPR (**Figure 3A**). Across all tested combinations of  
203 numbers of *cis*-associations and samples, *pro*MODMatcher resulted in >99% accuracy with 4-  
204 6% input labeling error rates, consistently outperformed MODMatcher (**Figure 3B**). The top goal  
205 of MODMatcher and *pro*MODMatcher is to identify sample labeling errors without introducing  
206 any errors. Thus, we optimized the specificity of *pro*MODMatcher over its sensitivity. In terms of  
207 sensitivity and specificity's contribution to F scores, *pro*MODMatcher achieved a similar  
208 sensitivity as MODMatcher (**Figure 3C**) but better specificities in all cases (**Figure 3D**). These  
209 simulation results suggest that *pro*MODMatcher is applicable for identifying and correcting  
210 labeling errors even when the number of *cis*-associations is small such as paring mRNA-miRNA  
211 or mRNA-RPPA profiles.

212

### 213 **Application to TCGA breast cancer dataset: mRNA and miRNA profiles**

214 Multiple omics data, including profiles of mRNA, miRNA, protein, DNA methylation, and CNV,  
215 were available in TCGA. The *proMODMatcher* was applied to align methylation and/or CNV  
216 profiles to mRNA profiles similar to what we did previously [8]. Here we focused on alignment of  
217 miRNA expression profiles to mRNA expression data because the number of candidate intrinsic  
218 cis-associations between miRNA and mRNA profiles was small. We used the TCGA breast  
219 cancer (BRCA) dataset as an example to illustrate the profile alignment results in detail. There  
220 were mRNA expression profiles based on two different platforms, Agilent microarray and  
221 RNAseq technology. There were 519 tumor samples with both mRNA expression measured in  
222 Agilent microarray and miRNA expression measured by small-RNA sequencing method, and  
223 1041 tumor samples with both mRNA expression measured in RNAseq and miRNA measured  
224 by small-RNA sequencing method. A small portion of miRNAs are embedded in gene regions  
225 (i.e. host genes) and frequently co-transcribed with host genes [14, 15] (**Figure 4A**), embedded  
226 miRNA-host gene pairs were candidate intrinsic *cis*-associations. Total 1222 miRNAs were  
227 profiled, and 227 and 271 of them were mapped to host genes, for Agilent microarray and  
228 RNAseq data, respectively. Among them, 138 out of 227 and 175 out of 271 miRNA-host genes  
229 pairs were significantly associated with each other at  $q\text{-value} < 0.05$ , for Agilent microarray and  
230 RNAseq data, respectively. For example, miR-452 located in the gene body of *GABRE*, its  
231 expression was highly associated with mRNA expression of *GABRE* (**Figure 4B**). Based on  
232 these intrinsic *cis*-associations between expression levels of miRNAs and host genes, we  
233 aligned the two types of omics data.

234

235 *Aligning gene expression profiles by RNAseq and miRNAseq data*

236 The similarity scores of self-aligned gene expression-miRNA expression profiles were much  
 237 higher than other possible pairings in general (**Figure 4C**): 898 out of 1041 (86.2%) the  
 238 similarity scores for self-self RNAseq-miRNAseq profiles were ranked at top 2%. For example,  
 239 the similarity score for the self-aligned profiles of TCGA-D8-A1JH-01 was top ranked among  
 240 other possible pairings (**Figure 4D**). Total 143 miRNA profiles that were not matched to the  
 241 corresponding mRNA profiles of the same sample names based on MODMatcher (e.g.  
 242 TCGA-B6-A0X7-01 shown in **Figure 4E**). Among profile pairs that were not self-aligned, 5 for  
 243 RNAseq profiles were cross-aligned to other samples' miRNA profiles (**Supplementary Table**  
 244 **S1**). The rate of alignment was low compared to alignments of other types of profile pairs. For  
 245 example, >99% profile pairs of DNA methylation and mRNA expression profiles were aligned  
 246 for the TCGA BRCA data set.

247 **Table 1.** Application of *proMODMatcher* to mRNA and miRNA profiles of TCGA BRCA data.

| Data types | Data types | # samples <sup>1</sup> | # cis pair <sup>2</sup> | # of self-aligned | # of cross | Cross-aligned pairs    | Self-aligned in RNA-CNV <sup>3</sup> | Cross-aligned pairs    | By MODMatcher <sup>4</sup> |
|------------|------------|------------------------|-------------------------|-------------------|------------|------------------------|--------------------------------------|------------------------|----------------------------|
| Type1      | Type 2     |                        |                         |                   |            | Type 1                 |                                      | Type 2                 |                            |
| RNAseq     | miRNAseq   | 1041                   | 175/215                 | 989 (95.0%)       | 1          | <b>TCGA-BH-A0BZ-01</b> | Y                                    | <b>TCGA-E2-A15K-01</b> | Y                          |
| Agilent    | miRNAseq   | 519                    | 138/178                 | 466 (89.7%)       | 9          | TCGA-A8-A07U-01        | Y                                    | TCGA-A2-A3XY-01        | Y                          |
|            |            |                        |                         |                   |            | TCGA-BH-A0H9-01        | Y                                    | TCGA-EW-A423-01        | N                          |
|            |            |                        |                         |                   |            | TCGA-AO-A128-01        | Y                                    | TCGA-BH-A18V-06        | Y                          |
|            |            |                        |                         |                   |            | <b>TCGA-A1-A0SD-01</b> | No: TCGA-BH-A0EI-01                  | <b>TCGA-BH-A0EI-01</b> | Y                          |
|            |            |                        |                         |                   |            | <u>TCGA-BH-A18K-01</u> | No: <u>TCGA-BH-A18T-01</u>           | <u>TCGA-BH-A18T-01</u> | <u>Y</u>                   |
|            |            |                        |                         |                   |            | <u>TCGA-BH-A18T-01</u> | No: <u>TCGA-BH-A18K-01</u>           | <u>TCGA-BH-A18K-01</u> | <u>Y</u>                   |
|            |            |                        |                         |                   |            | <b>TCGA-BH-A0BZ-01</b> | Y                                    | <b>TCGA-E2-A15K-01</b> | Y                          |
|            |            |                        |                         |                   |            | <b>TCGA-BH-A0BS-01</b> | No: TCGA-BH-A0BT-01                  | <b>TCGA-BH-A0BT-01</b> | Y                          |
|            |            |                        |                         |                   |            | TCGA-AR-A0U0-01        | Y                                    | TCGA-AR-A256-01        | Y                          |

248 The **bold** indicates cross-alignments supported by other data and underlines indicates sample swaps.  
 249 <sup>1</sup>The number of common sample with both type1 and type2 profiles.  
 250 <sup>2</sup>The number of significant cis-pairs at q-value <0.05 at final iteration and the number of cis-pairs investigated.  
 251 <sup>3</sup>Indicating the RNA samples of cross-aligned pairs were self-aligned or not in alignment between RNA profile (Agilent  
 252 array or RNAseq) and CNV profile. The aligned pairs were also shown if there was a cross-aligned sample.  
 253 <sup>4</sup>Indicating whether the cross-aligned pairs were cross-aligned by MODMatcher.  
 254 Applying *proMODMatcher* to TCGA BRCA RNAseq-miRNAseq datasets, the

255 probabilities of similarity scores (before multiplying prior probability) for self-aligned RNAseq-  
256 miRNA profiles were much higher than other possible pairs in general (**Figure 4F**). An example  
257 of similarity scores of a self-aligned RNAseq-miRNA profile pair and other possible pairs is  
258 shown in **Figure 4G**. There were multiple self-self pairs with low probabilities for self-alignment  
259 (**Figure 4F** and **Figure 4H**), suggesting potential labeling errors in RNAseq and/or miRNA  
260 profiles. Overall, 989 out of 1041 candidate matching pairs (i.e. 95.0%) (**Table 1**) were self-  
261 aligned compared to 86.2% for MODMatcher. Among profiles that were not self-aligned, 1  
262 profile pair (i.e. TCGA-BH-A0BZ-01 and TCGA-E2-A15K-01) was cross-aligned to each other  
263 (**Table 1**).

264 Comparing MODMatcher and *pro*MODMatcher, the *pro*MODMatcher identified additional  
265 91 self-aligned profile pairs that were missed by MODMatcher. For example, the similarity score  
266 of self-alignment for TCGA-AO-A0JF-01 was among the highest one when the miRNA profile  
267 compared to RNAseq profiles of other samples (y-axis in **Figure 5A**). However, the RNAseq  
268 profile of TCGA-AO-A0JF-01 was highly similar with multiple miRNA profiles of other samples  
269 (x-axis in **Figure 5A**). As a result, the rank-based MODMatcher rejected the self-alignment, but  
270 *pro*MODMatcher identified self-alignment for TCGA-AO-A0JF-01 with p-value of  $7.3 \times 10^{-6}$ .

271 One cross-aligned pair, RNAseq of TCGA-BH-A0BZ-01 and miRNA of TCGA-E2-A15K-  
272 01, was identified by both *pro*MODMatcher and MODMatcher. The similarity score of the cross-  
273 aligned pair is shown in **Figure 5B**. The similarity scores of self-self alignments were low (red  
274 dots in **Figure 5B**); on the other hand, the similarity score of the cross-aligned pair was  
275 significantly higher compared to other similarity scores (**Figure 5B**), indicating high confidence  
276 of cross-alignment. On the other hand, the cross-aligned pairs detected only by MODMatcher  
277 showed relatively marginal similarity scores even though the similarity scores of cross-aligned  
278 pairs were the highest (**Supplementary Figure S2**). Furthermore, we compared significance

279 levels of *cis*-associations based on profile pairs aligned by MODMatcher and *pro*MODMatcher.  
280 They were comparable in general with a few highly significant *cis*-associations more significant  
281 based on *pro*MODMatcher compared to MODMatcher (**Figure 5C**).

282

283 *Aligning gene expression profiles by Agilent microarray and miRNAseq data*

284 MODMatcher and *pro*MODMatcher were also applied to align mRNA expression profiles based  
285 Agilent microarray and miRNA profiles. There were 138 *cis*-associations identified based on  
286 Agilent microarray data and miRNAseq data. Based on these *cis*-associations, 87% of  
287 candidate profile pairs were identified as self-aligned by MODMatcher (**Supplementary Table**  
288 **S1**) while 89.7% of candidate profile pairs were self-aligned by *pro*MODMatcher (**Table 1**).

289 Among profiles that were not self-aligned, 9 cross-aligned profile pairs were identified by  
290 *pro*MODMatcher (**Table 1, Supplementary Figure S3B**), 8 out of 9 pairs were also detected by  
291 MODMatcher (**Table 1**). MODMatcher detected additional cross-aligned pairs including several  
292 questionable cross-aligned pairs (i.e. TCGA-E2-A153-01 and TCGA-E9-A1NG-01, TCGA-  
293 AR-A1AL-01 and TCGA-AR-A1AN-01 in **Supplementary Figure S4**). The cross-aligned pairs  
294 by *pro*MODMatcher included a possible swap between TCGA-BH-A18K-01 and TCGA-BH-  
295 A18T-01 (**Figure 6A** and **Table 1**). To determine the source of labeling errors (due to mRNA  
296 Agilent profiles or miRNA profiles) other omics profiles were compared with each other and  
297 results were summarized into a patient-centric view (**Figure 6B**). For patient/sample TCGA-  
298 BH-A18K, the RNAseq and miRNAseq profiles were self-aligned and the RNAseq and CNV  
299 profiles were self-aligned as well (**Figure 6B**). Similarly, for patient/sample TCGA-BH-A18T, the  
300 RNAseq profile was self-aligned to the miRNA, CNV, and DNA methylation profiles as well as  
301 the RPPA profile (detailed below) (**Figure 6B**). The cross-alignments of TCGA-BH-A18K-01  
302 and TCGA-BH-A18T-01 mRNA Agilent profiles with their miRNA profiles (**Figure 6B**) indicate



303 sample swapping occurred in mRNA Agilent array profiles. After swapping the corresponding  
304 mRNA Agilent array profiles, multiple-omics profiles of TCGA-BH-A18K and TCGA-BH-A18T  
305 were aligned to each other consistently (**Figure 6C**). Our previous study based on pairwise  
306 profile alignments of gene expression, DNA methylation and CNV also identified the sample  
307 swaps in mRNA Agilent array profiles of TCGA-BH-A18K-01 and TCGA-BH-A18T-01 [8]  
308 (**Figure 6B-C**). In addition, *proMODMatch* identified a cross-alignment of the mRNA Agilent  
309 array profile of TCGA-A1-A0SD-01 and the miRNA profile of TCGA-BH-A0EI-01 (**Table 1**,  
310 **Figure 6D**), consistent with potential sample swaps of mRNA Agilent array profiles of TCGA-A1-  
311 A0SD-01 and TCGA-BH-A0EI-01 when alignments of other omics profiles were included.  
312 Similarly, the cross-alignment between the Agilent array profile of TCGA-BH-A0BS-01 and the  
313 miRNA profile of TCGA-BH-A0BT-01 was likely a result of a swap between the Agilent array  
314 profiles of the two samples when adding all available omics data into the comparison (**Figure**  
315 **6E**).

316 The *proMODMatcher* identified a cross-aligned pair between the mRNA Agilent array  
317 profile of TCGA-BH-A0BZ-01 and the miRNA profile of TCGA-E2-A15K-01 (See **Table 1**, **Figure**  
318 **6F**). The miRNA profile of TCGA-E2-A15K-01 was also cross-aligned to the mRNAseq profile of  
319 TCGA-BH-A0BZ-01 (**Table 1**, **Figure 5B**). When including alignments of other omics profiles in  
320 a patient-centric view (**Figure 6F**), the result suggests that there was a labeling error of the  
321 miRNA profile of TCGA-E2-A15K-01.

322 These results together suggest that *proMODMatcher* with 138 *cis*-associations can  
323 accurately identify sample labeling errors and unambiguously correct labeling errors.

324

325 **Application to TCGA breast cancer dataset: mRNA and RPPA profiles**

326 There were 424 tumor samples with both mRNA expression measured in Agilent microarray and  
327 RPPA data, and 856 tumor samples with both mRNA expression measured in RNAseq and  
328 RPPA data. Total 145 proteins were mapped to unique mRNA transcripts, and 97 and 104 of  
329 protein-mRNA pairs whose protein abundance was significantly correlated ( $q < 0.05$ ) with the  
330 corresponding mRNA's expression level were defined as significant *cis*-associations based on  
331 Agilent microarray and RNAseq data, respectively (**Figure 7A** and **Table 2**). And 84.9% and  
332 80.2% of candidate profile pairs were identified as self-aligned by *proMODMatcher* (**Table 2**).  
333 Examples of similarity scores of a self-aligned RNAseq-miRNA profile pair (**Figure 7B**) and a  
334 cross-alignment (**Figure 7C, Supplementary Figure S5**) comparing with other possible pairs  
335 are shown. The cross-aligned pair of the mRNA Agilent microarray profile TCGA-AR-A1AV-01  
336 and the RPPA profile of TCGA-AR-A1AW-01 data was identified (**Figure 7D**), consistent with  
337 labeling errors in the mRNA Agilent array data (**Figure 7D**). However, this pair was not identified  
338 by MODMatcher (**Table 2**). The potential cross-alignment between the mRNA Agilent  
339 microarray profile TCGA-AR-A1AW-01 and the RPPA profile of TCGA-AR-A1AV-01 data was not  
340 identified (**Figure 7D**), suggesting *proMODMatcher*'s sensitivity is limited when the number of  
341 *cis*-associations is around 100. A large number of non-random missing data in RPPA data  
342 (**Supplementary Figure S6**) may also contribute to low sensitivity of the method.

343 **Table 2.** Application of *proMODMatcher* to mRNA and RPPA profiles of TCGA BRCA data

| Data types | Data types | # samples <sup>1</sup> | # cis pair <sup>2</sup> | # of self-aligned | # of cross | Cross-aligned pairs    | Self-aligned in RNA-CNV <sup>3</sup> | Cross-aligned pairs    | By MODMatcher <sup>4</sup> |
|------------|------------|------------------------|-------------------------|-------------------|------------|------------------------|--------------------------------------|------------------------|----------------------------|
| Type1      | Type 2     |                        |                         |                   |            | Type 1                 |                                      | Type 2                 |                            |
| RNAseq     | RPPA       | 856                    | 104/151                 | 687 (80.2%)       | 1          | TCGA-A7-A56D-01        | Y                                    | TCGA-W8-A86G-01        | Y                          |
| Agilent    | RPPA       | 424                    | 97/145                  | 360 (84.9%)       | 11         | TCGA-BH-A0DS-01        | No :TCGA-BH-A0BA-01                  | TCGA-E2-A1IL-01        | Y                          |
|            |            |                        |                         |                   |            | TCGA-E2-A10C-01        | Y                                    | TCGA-LL-A5YN-01        | Y                          |
|            |            |                        |                         |                   |            | TCGA-E2-A1B0-01        | Y                                    | TCGA-D8-A1JK-01        | Y                          |
|            |            |                        |                         |                   |            | <b>TCGA-AR-A1AV-01</b> | <b>No: TCGA-AR-A1AW-01</b>           | <b>TCGA-AR-A1AW-01</b> | <b>N</b>                   |
|            |            |                        |                         |                   |            | TCGA-E2-A1B6-01        | No:TCGA-E2-A1B5-01                   | TCGA-AR-A255-01        | N                          |
|            |            |                        |                         |                   |            | TCGA-A8-               | Y                                    | TCGA-D8-               | N                          |

|  |  |  |  |  |  |                 |   |                 |   |
|--|--|--|--|--|--|-----------------|---|-----------------|---|
|  |  |  |  |  |  | A07J-01         |   | A1JU-01         |   |
|  |  |  |  |  |  | TCGA-A8-A0AB-01 | Y | TCGA-EW-A1J3-01 | N |
|  |  |  |  |  |  | TCGA-AN-A04C-01 | Y | TCGA-E9-A1N9-01 | N |
|  |  |  |  |  |  | TCGA-E2-A105-01 | Y | TCGA-C8-A1HO-01 | Y |
|  |  |  |  |  |  | TCGA-AN-A0XL-01 | Y | TCGA-D8-A1Y2-01 | N |
|  |  |  |  |  |  | TCGA-AN-A0XV-01 | Y | TCGA-GM-A2DM-01 | N |

344 The **bold** indicates cross-alignments supported by other data.  
345 <sup>1</sup>The number of common sample with both type1 and type2 profiles.  
346 <sup>2</sup>The number of significant cis-pairs at q-value <0.05 at final iteration and the number of cis-pairs investigated.  
347 <sup>3</sup>Indicate the RNA sample of cross-aligned pairs are self-aligned or not in alignment between RNA profile (Agilent  
348 array or RNAseq) and CNV profile. The aligned pairs are also shown if there is a cross-aligned sample.  
349 <sup>4</sup>Indicate cross-aligned pairs are cross-aligned by MODMatcher.

350  
351 **Application to TCGA pan-cancer datasets**

352 The *pro*MODMatcher was also applied to pan-cancer datasets (total 22 different types of  
353 cancers) in TCGA to align miRNA (**Table 3**) and RPPA profiles (**Table 4**) with mRNA profiles.  
354 When aligning RNAseq and miRNAseq profiles, more than 95% of candidate profile pairs were  
355 identified as self-aligned for most cancer datasets (**Figure 8A**). The self-alignment rates for  
356 SARC, DLBC, and CESC were 100%, suggesting high data quality for the datasets (**Figure 8A**,  
357 **Table 3**). On the other hand, miRNA expression profiles were aligned to mRNA expression  
358 profiles (i.e. Agilent, HG-U133, or RNAseq) at low self-alignments rate for the GBM dataset  
359 (**Figure 8A**), suggesting low quality of the TCGA GBM miRNA profiles.

360 For alignments between mRNA and RPPA profiles, the self-alignment rates were lower  
361 than alignments between mRNA and miRNA (**Figure 8B**) for most datasets due to lower  
362 numbers of cis-associations between mRNA and RPPA profiles. The self-alignment rates for  
363 DLBC (96.97%) and SARC (97.7%) were higher compared to other datasets (**Figure 8AB**),  
364 again suggesting high data qualities of the datasets. This observation indicates some datasets  
365 in TCGA showed consistently high confidence for sample quality and low data labeling errors.

366 Even in datasets of high quality, sample labeling errors were detected. For example, the  
367 self-alignment rate for mRNA-miRNA profiles of the TCGA UCEC dataset was 98%. Four

368 cross-alignments were identified (**Table 3**). Two of them were likely due to a swap of miRNA  
369 profiles of TCGA-AX-A1C4-01 and TCGA-AX-A1CI-01 after considering other types of omics  
370 data (**Figure 8C**). Similarly, the self-alignment rate for mRNA-miRNA profiles of the TCGA OV  
371 dataset was 96.9%. Five cross-alignments were identified (**Table 3**). Two of them were likely  
372 due to a swap of miRNA profiles of TCGA-24-2261-01 and TCGA-31-1953-01 (**Figure 8D**).

373

### 374 **Application to ICGC datasets**

375 We applied *proMODMatcher* to 8 cancer datasets that were generated by institutes in the U.S.,  
376 Spain, UK, Germany, Australia, Canada, and France. Each dataset contains more than one  
377 types of omics data including mRNA expression profiles (i.e. RNAseq and Array), DNA  
378 methylation profiles based on Illumina HumanMethylation450 (HM450), miRNA expression  
379 profiles, and copy number somatic mutation profiles. The ICGC datasets used and the  
380 associated alignment results were summarized in **Table 5**. In some of datasets such as PAEN-  
381 AU and PRAD-FR, all profiles were matched to other corresponding profiles of the same  
382 sample names (**Table 5**). On the other hand, several sample errors were identified in some  
383 datasets. For example, mapping between gene expression Array and CNV profiles in the  
384 NBL-US dataset resulted in 170 self-self aligned sample pairs, 10 non self-self aligned samples  
385 and 12 cross-mapped pairs of profiles (examples shown in **Figure 9A**). Mapping gene  
386 expression profiles by RNAseq and Array in the CLLE-ES dataset yielded five non self-self  
387 aligned samples and two cross-mapped pairs of samples. The two cross-mapped pairs of  
388 samples were likely due to a swap of either RNAseq profile or Array profile (**Figure 9B**).  
389 Similarly, *proMODMatcher* identified three cross-alignments between RNAseq and DNA  
390 methylation profiles in the PRAD-CA dataset, which were also involved in cross-mappings when  
391 mapping Array and DNA methylation profiles: two of them were likely due to a swap of DNA

392 methylation (HM450) profiles of DO229525 and DO51109 (**Figure 9CD**), and one of them was  
 393 likely due to sample labeling errors in DNA methylation array (HM450) (**Figure 9CD**).

394 **Table 5.** Application of *proMODMatcher* to datasets with multiple types of omics datasets from  
 395 ICGC database

| Dataset | Cancer type                           | Country   | Data types |             | # samples | # cis pair | # self | # non-self | # cross |
|---------|---------------------------------------|-----------|------------|-------------|-----------|------------|--------|------------|---------|
|         |                                       |           | Type1      | Type 2      |           |            |        |            |         |
| CLLE-ES | Chronic Lymphocytic Leukemia          | Spain     | Exp-Array  | Methylation | 139       | 3614       | 139    | 0          | 0       |
|         |                                       |           | Exp-Array  | Exp-Seq     | 293       | 12753      | 288    | 5          | 2       |
|         |                                       |           | Exp-Seq    | Methylation | 101       | 3666       | 101    | 0          | 0       |
| MALY-DE | Malignant Lymphoma                    | Germany   | Exp-Seq    | miRNA       | 49        | 134        | 49     | 0          | 0       |
| PAEN-AU | Pancreatic Cancer Endocrine neoplasms | Australia | Exp-seq    | CNV         | 32        | 2205       | 32     | 0          | 0       |
|         |                                       |           | Exp-Array  | CNV         | 23        | 541        | 23     | 0          | 0       |
|         |                                       |           | Exp-Array  | Exp-Seq     | 21        | 3425       | 21     | 0          | 0       |
|         |                                       |           | Exp-Seq    | Methylation | 32        | 3902       | 32     | 0          | 0       |
|         |                                       |           | Exp-Array  | Methylation | 31        | 3845       | 31     | 0          | 0       |
| NBL-US  | Neuroblastoma                         | USA       | Exp-Array  | CNV         | 180       | 2396       | 170    | 10         | 12      |
| OV-AU   | Ovarian                               | Australia | Exp-Seq    | Methylation | 80        | 1045       | 80     | 0          | 0       |
|         |                                       |           | Exp-Seq    | miRNA       | 82        | 56         | 79     | 3          | 0       |
| PRAD-CA | Prostate Cancer Adenocarcinoma        | Canada    | Exp-Array  | Exp-Seq     | 136       | 10676      | 133    | 3          | 0       |
|         |                                       |           | Exp-Array  | Methylation | 210       | 3114       | 196    | 14         | 4       |
|         |                                       |           | Exp-Seq    | Methylation | 142       | 4263       | 132    | 10         | 3       |
| PRAD-FR | Prostate Cancer Adenocarcinoma        | France    | Exp-Array  | Exp-Seq     | 25        | 4249       | 25     | 0          | 0       |
| PACA-AU | Pancreatic Cancer                     | Australia | Exp-Array  | Exp-Seq     | 72        | 7548       | 72     | 0          | 0       |
|         |                                       |           | Exp-Array  | CNV         | 121       | 1041       | 118    | 3          | 0       |
|         |                                       |           | Exp-Seq    | CNV         | 79        | 1327       | 78     | 1          | 0       |
|         |                                       |           | Exp-Seq    | Methylation | 77        | 5538       | 77     | 0          | 0       |
|         |                                       |           | Exp-Array  | Methylation | 174       | 2514       | 169    | 5          | 1       |

396

## 397 Discussion

398 We developed a sample alignment method, *proMODMatcher*, for detecting and correcting  
 399 sample labeling errors by aligning omics profiles. The *proMODMatcher* extended our previous  
 400 method MODMatcher by estimating probabilities of potential matches rather than using ranks of  
 401 similarity scores. Applied to simulated datasets, *proMODMatcher* outperformed MODMatcher  
 402 when aligning the omics data profiles with relatively small number of *cis*-associations. We  
 403 showed that the number of candidate intrinsic *cis*-association between mRNA-miRNA profiles or  
 404 mRNA-RPPA profiles was low. Application of our *proMODMatcher* to alignment between  
 405 mRNA-miRNA profile pairings and mRNA-RPPA profile pairings from 22 different cancer

406 datasets in TCGA demonstrated that sample labeling errors occurred even in datasets of high  
407 quality and our procedure was not only able to identify sample labeling errors but also to  
408 unambiguously identify the source of the errors.

409 Integrating multi-omics data into comprehensive network models is essential to elucidate  
410 complex molecular mechanisms of cancers. After correcting sample labeling errors,  
411 associations between different profiles were stronger. For example, mis-labeled samples were  
412 outliers when comparing significant pairs between mRNA and miRNA expression levels in the  
413 TCGA BRCA dataset (**Figure 10A**, red dots were mis-labeled samples). Spearman correlation  
414 between expression levels of miRNAs and their host genes were improved for most pairs of  
415 miRNA-host genes after curating sample labeling errors (**Figure 10B**).

416 We showed that some potential cross-aligned profiles pairs in the TCGA BRCA dataset  
417 were missed by *proMODMatcher*. The sensitivity and accuracy of multi-omics profile matching  
418 methods needs further improvement. Integrating more than two types of profiles in probability  
419 estimation may yield more robust sensitivity and specificity when the number of cis-associations  
420 is small.

421 The *proMODMatcher* depends on a set of biological *cis*-associations and the information  
422 content (Shannon entropy) of each *cis*-association depends on the randomness of each locus or  
423 gene. Thus, in our analyses, we excluded biological *cis*-associations that are driven by extreme  
424 values (rare events). For example, in eQTL analyses, we only included loci of minor allele  
425 frequency (MAF)>0.05. Missing values commonly occur in high throughput omics data. In our  
426 analyses, we don't explicitly impute missing values. Instead, we filtered out probes or genes of  
427 more than 25% missing value in the data pre-processing step.

428           The computational cost of applying *proMODMatcher* is small. For example, mapping  
429 mRNA and miRNA expression profiles for 408 samples took 802 seconds of CPU time with  
430 maximum memory usage of 503 MB on a machine with CPU processor 3.50 GHz.

431

## 432 **Potential implications**

433 Our results demonstrated that sample labeling errors were common in large multi-omics  
434 datasets. Our method has improved statistical accuracy to identify and curate these errors over  
435 the previous method, and generally applicable to other data sets. Application of our general  
436 framework for automated curation of public databases and properly merging omics data would  
437 be the fundamental basis for the development of effective integrative approaches.

438

## 439 **Methods**

### 440 **A general framework of multi-omics data matching: Pairwise alignments based on *cis*-** 441 **associations**

442 We followed the general framework of multi-omics data matching of the previous study [8]. Two  
443 types of data (or profiles) (i.e. Type A and Type B in **Figure 1**) were matched based on their *cis*-  
444 associations. Probes in different types of data were matched by intrinsic biological relationships.  
445 For example, probes in methylation, miRNA and Copy number variation (CNV) profiles were  
446 mapped to a close transcript based on hg19 reference genome. Samples were initially matched  
447 based on annotated sample ID and potential *cis*-associations (**Figure 1A**). The significant *cis*-  
448 associations from two different data types were identified by the Spearman correlations at  
449 Benjamini-Hochberg (BH) adjusted q-value < 0.05 (**Figure 1B**). The data for each *cis*-  
450 association was normal rank-transformed as  $RT(A_{n,i})$  and  $T(B_{n,i})$ , where  $A_{n,i}$  and  $B_{n,i}$   
451 represents the measurements of sample  $i$  and  $n$ th *cis*-related probes for Type A and B profiles,

452 respectively (**Figure 1B**). For simplicity, we omitted all normal rank transformation in the rest of  
453 notations. The profile similarity between the two types of data  $S(A_i, B_j)$  is defined as (**Figure**  
454 **1C**):

$$455 \quad S(A_i, B_j) = \text{corr}(A_i, B_j)$$
$$456 \quad = \frac{\sum_{n=1}^N A_{n,i} \sum_{n=1}^N B_{n,j} - N \sum_{n=1}^N A_{n,i} \times B_{n,j}}{\sqrt{N \sum_{n=1}^N A_{n,i}^2 - (\sum_{n=1}^N A_{n,i})^2} \sqrt{N \sum_{n=1}^N B_{n,i}^2 - (\sum_{n=1}^N B_{n,i})^2}}$$

457  
458 First, profile pairs matched by annotated sample IDs were checked whether their similarity  
459 scores were high (**Figure 1D**) to be annotated as “self-aligned”. If not, additional steps were  
460 applied to find any potential matches among other unmatched profiles (**Figure 1E**). The  
461 matched profile pairs were then used to update significant *cis*-associations. We iteratively  
462 refined profile alignment and rounds of alignments were repeated until there were no further  
463 updates.

464

### 465 **Biological *cis*-associations**

466 “Biological *cis*-associations” reflect different biological regulations when different pairs of omics  
467 data are mapped. (1) *cis*-eQTLs for mapping genotype and gene expression data: a genetic  
468 polymorphism at a gene’s promotor or regulatory region affects transcription factors or co-  
469 factors\_binding, which in turn affects the abundance of the gene’s transcripts [11]. If the genetic  
470 polymorphism occurs within 1M bases from the gene’s transcription start site and the  
471 association is significant at the false discovery rate (FDR) <0.05, the association is called as a  
472 *cis*-eQTL. (2) *cis*-methylations for mapping DNA methylation and gene expression data:  
473 increased DNA methylation at CpGs sites near a gene promoter region is associated with gene  
474 repression [12]. A methylation probe is assigned to the transcript whose start site is closest to



475 the genomic location of the methylation probe when it is potentially mapped to multiple  
476 transcripts. If a DNA methylation probe locates within 1M bases from the gene's start site and  
477 the association between the methylation level and the gene's expression level is significant at  
478 FDR <0.05, the methylation probe is a *cis*-methylation probe. (3) *cis*-CNVs for mapping DNA  
479 copy number variations (CNVs) and gene expression profiles: amplified or deleted genomic  
480 regions can regulate the expression levels of genes within that genomic region [16]. If a gene's  
481 expression is associated with its CNV at FDR <0.05, the CNV is a *cis*-CNV. (4) *cis*-miRNA-  
482 gene pairs for mapping miRNA and gene expression profiles: a small portion of miRNAs are  
483 embedded in gene regions (i.e. host genes) and frequently co-transcribed with host genes [14,  
484 15]. If the expression levels of a miRNA and its host gene are associated at FDR <0.05, the  
485 pair is a *cis*-miRNA-gene pair. (5) *cis*-mRNA-protein pairs for mapping protein and gene  
486 expression profiles: the abundance of a protein depends on the corresponding mRNA transcript  
487 level and other factors [17]. If their association is significant at FDR <0.05, the pair is a *cis*-  
488 mRNA-protein pair.

489

#### 490 **Multi-Omics Data matcher (MODMatcher)**

491 In the "Determine self-aligned vs. cross-aligned" step (**Figure 1E**), the similarity scores of self-  
492 aligned profiles between type A and type B,  $S(A_i, B_i)$ , were top 5% ranked among  $S(A_n, B_i)$ ,  $n =$   
493  $1 \dots N_A$  as well as  $S(A_i, B_n)$ ,  $n = 1 \dots N_B$ , to be annotated as *self-aligned*, where  $N_A$  and  $N_B$   
494 represent the number of samples of type A and type B, respectively. If the sample sizes were  
495 bigger than 400, top 20 was used as the threshold for self-alignment. Next, for the profiles that  
496 were not self-aligned, reciprocal mapping was applied to find any potential matches among  
497 other unmatched profiles. If sample  $j$  of type A and sample  $k$  of type B,  $S(A_i, B_k)$  is 1<sup>st</sup> ranked

498 among  $S(A_j, B_n), n = 1 \dots N_B$  as well as  $S(A_n, B_k), n = 1 \dots N_A$ , then the pair is annotated as  
499 *cross-aligned*.

500

### 501 **A probabilistic Multi-Omics Data matcher (proMODMatcher)**

502 The characteristics (noises, biases, dynamic ranges, and etc.) of two types of profiles may be  
503 different. The rank-based cutoff was not able to reflect similarity score differences in a specific  
504 similarity score distribution with a large or small variance (**Supplementary Figure S7**). In the  
505 “Determine self- vs. cross-aligned” step, the *proMODMatcher* evaluated a similarity score in a  
506 bivariate normal distribution,  $X \sim N_2(\boldsymbol{\mu}, \boldsymbol{\Sigma})$ , where  $\boldsymbol{\mu}$  is the mean vector and  $\boldsymbol{\Sigma}$  is the covariance  
507 matrix (**Figure 1D**). The probability of a match between profile  $i$  of type A and profile  $j$  of type B,  
508  $P(A_i, B_j) = P(S(A_i, B_j), S(A_i, B_j))$ , is estimated based on a score distribution  
509 of  $(S(A_i, B_m), S(A_m, B_j))$ , where  $A_m$  and  $B_m$  represent type A and type B profile of the  $m^{\text{th}}$   
510 matched profile pairs, respectively. Given the bivariate normal distribution, we calculated the  
511 distance of a point  $x = (S(A_i, B_m), S(A_m, B_j))$  to the center of the distribution, known as  
512 Mahalanobis distance, as  $r = \sqrt{(x - \boldsymbol{\mu})^T \boldsymbol{\Sigma}^{-1} (x - \boldsymbol{\mu})}$ , and the cumulative function  $F(R \leq r) = 1 -$   
513  $e^{-r^2/2}$ . To obtain a more robust estimation of covariance matrix  $\boldsymbol{\Sigma}$  of the distribution, we added  
514 1000 profile pairs of randomly permuted profiles in addition to true profile pairs.

515 Additionally, we introduced a prior probability of self-alignment  $p_0$ . Thus, given profiles  $A_i$   
516 and  $B_j$  and their similarity score  $S(A_i, B_j)$  as well as estimated Mahalanobis distance  $r_{ij}$ , we  
517 calculated the p-value of the two profiles matched by chance as  $p(A_i, B_j) =$

518  $\begin{cases} p_0 * e^{-r_{ij}^2/2}, \text{if } i = j \\ e^{-r_{ij}^2/2}, \text{if } i \neq j \end{cases}$ . In this study, the prior probability  $p_0$  was set as  $p_0 = 1/N_s$ , where  $N_s$

519 represents number of samples. We also set global similarity score cutoffs for self-alignment,

520  $S_{self}^{cutoff}$ , as well as cross-alignment,  $S_{cross}^{cutoff}$ . The  $S_{self}^{cutoff}$  value was set as the lower bound of  
521 99% of the self-self similarity scores estimated by mean and standard deviations of  $S(A_i, B_i)$ ,  
522 where  $i$  indicates the samples with both type A and Type B profiles. And the  $S_{cross}^{cutoff}$  was set as  
523 the lower bound of 68% of the self-self similarity scores.

524 The similarity score  $S(A_i, B_j)$  and its corresponding p-value  $p(A_i, B_j)$  were used to  
525 identify matched pairs between type A and type B profiles (**Figure 1E**). Each round of our  
526 procedure consisted of three steps. First, the self-alignment similarity score  $S(A_i, B_i)$  and  
527 corresponding p-value  $p(A_i, B_i)$  were calculated. If  $S(A_i, B_i) > S_{self}^{cutoff}$  and  $(A_i, B_i) < p_{i \neq j}(A_i, B_j)$ ,  
528 then the profiles  $A_i$  and  $B_i$  were self-aligned. Second, for a profile  $A_i$  that was not self-aligned  
529 to the profile  $B_i$  in the first step, it was compared to all unmapped profile  $B_j$ . If the similarity  
530 score  $S(A_i, B_j) < S_{cross}^{cutoff}$  and the corresponding p-value  $p(A_i, B_j) \leq \arg \min_{n \in [1, \dots, N_B]} (p(A_i, B_n))$   
531 and  $p(A_i, B_j) \leq \arg \min_{n \in [1, \dots, N_A]} (p(A_n, B_j))$ , then the profiles  $A_i$  and  $B_j$  were cross-aligned. Third,  
532 for profile pairs  $A_i$  and  $B_i$  that were not aligned in the first two steps, if  $S(A_i, B_i) > S_{self}^{cutoff}$  and  
533 the p-value  $p(A_i, B_i)$  was smaller than the fifth smallest among  $p(A_i, B_n), n = 1 \dots N_B$  as well as  
534  $p(A_n, B_i), n = 1 \dots N_A$ , then the profiles  $A_i$  and  $B_i$  were rescued as self-aligned. The rounds of  
535 alignments were repeated until there was no further change.

536

### 537 **Correlation of cis-associated mRNA and miRNA before and after correcting labeling**

#### 538 **errors**

539 To assess improvement of signals after labeling error correction, we calculated Spearman  
540 correlation between miRNA expression and its host genes with initially matched pairs based on  
541 sample ID and with aligned sample pairs. To avoid bias due to different number of samples, we  
542 matched the number of samples of initially matched pairs to the number of aligned pairs. We

543 randomly selected the samples with the same number of aligned pairs, and calculated the  
544 Spearman correlation. We performed random selection 100 times and calculated mean of  
545 correlation.

546

## 547 **Availability of source code and requirements**

548 Project name: ProMODMatcher (passcode to decrypt the zipped file is “password123”)

549 Project home page: Github site (<https://github.com/integrativenetworkbiology/proMODMatcher>)

550 and <http://research.mssm.edu/integrative-network-biology/Software.html>

551 Operating system: Platform independent

552 Programming language: R (R 3.5.1 or later)

553 Other requirements: R package mnormt

554 License: GNU General Public License

555 RRID: SCR\_017219

556

## 557 **Availability of supporting data and materials**

558 Data supporting the results of this article are deposited in Data supporting the results of this

559 article are publicly available at firehose database, TCGA data portal, and ICGC data portal (see

560 Data Description).

561

## 562 **Declarations**

### 563 **List of abbreviations**

564 TCGA: The Cancer Genome Atlas

565 QC: quality control

566 MODMatcher: Multi-Omics Data matcher  
567 *pro*MODMatcher : A probabilistic Multi-Omics Data matcher  
568 BH: Benjamini-Hochberg  
569 FPR: false positive rate  
570 RPPA: Reverse Phase Protein Array  
571 CNV: Copy number variation  
572 HM27: Illumina HumanMethylation27 Beadchip  
573 HM450: Illumina HumanMethylation450 Beadchip  
574 BRCA: breast invasive carcinoma  
575 BLCA: Bladder urothelial carcinoma  
576 CESC: Cervical and endocervical cancers  
577 COAD: Colon adenocarcinoma  
578 DLBC: Lymphoid Neoplasm Diffuse Large B-cell Lymphoma  
579 GBM: Glioblastoma multiforme  
580 HNSC: Head and Neck squamous cell carcinoma  
581 KIRC: Kidney renal clear cell carcinoma  
582 KIRP: Kidney renal papillary cell carcinoma  
583 LGG: Brain Lower Grade Glioma  
584 LIHC: Liver hepatocellular carcinoma  
585 LUAD: Lung adenocarcinoma  
586 LUSC: Lung squamous cell carcinoma  
587 OV: Ovarian serous cystadenocarcinoma  
588 PRAD: Prostate adenocarcinoma  
589 READ: Rectum adenocarcinoma

590 SARC: Sarcoma

591 SKCM: Skin Cutaneous Melanoma

592 STAD: Stomach adenocarcinoma

593 THCA: Thyroid carcinoma

594 UCEC: Uterine Corpus Endometrial Carcinoma

595

596 **Consent for publication**

597 Not applicable.

598

599 **Competing interests**

600 The authors declare that they have no competing interests.

601

602 **Funding**

603 This work was partially supported by National Institutes of Health [grant numbers R01-  
604 AG046170, U01-HG008451, and U19-AI118610].

605

606 **Authors' contributions**

607 EL and JZ designed research. EL performed research and analyzed data. SY contributed to  
608 download data and analyzed data by MODMatcher method. WW contributed design of  
609 simulation. ZT contributed revising paper. EL and JZ wrote the paper. All authors read and  
610 approved the final manuscript.

611

612 **Acknowledgements**

613 We thank members of Zhu laboratory for discussions.

614

615 **REFERENCES**

- 616 1. Chen Y, Zhu J, Lum PY, Yang X, Pinto S, MacNeil DJ, et al. Variations in DNA elucidate  
617 molecular networks that cause disease. *Nature*. 2008;452 7186:429-35.
- 618 2. Cancer Genome Atlas N. Comprehensive molecular portraits of human breast tumours.  
619 *Nature*. 2012;490 7418:61-70. doi:10.1038/nature11412.
- 620 3. Lee E, de Ridder J, Kool J, Wessels LF and Bussemaker HJ. Identifying regulatory  
621 mechanisms underlying tumorigenesis using locus expression signature analysis.  
622 *Proceedings of the National Academy of Sciences of the United States of America*.  
623 2014;111 15:5747-52. doi:10.1073/pnas.1309293111.
- 624 4. Zhong H, Beaulaurier J, Lum PY, Molony C, Yang X, Macneil DJ, et al. Liver and  
625 adipose expression associated SNPs are enriched for association to type 2 diabetes.  
626 *PLoS Genet*. 2010;6 5:e1000932. doi:10.1371/journal.pgen.1000932.
- 627 5. Schadt EE, Molony C, Chudin E, Hao K, Yang X, Lum PY, et al. Mapping the genetic  
628 architecture of gene expression in human liver. *PLoS Biol*. 2008;6 5:e107.
- 629 6. Hsu YH, Zillikens MC, Wilson SG, Farber CR, Demissie S, Soranzo N, et al. An  
630 integration of genome-wide association study and gene expression profiling to prioritize  
631 the discovery of novel susceptibility Loci for osteoporosis-related traits. *PLoS genetics*.  
632 2010;6 6:e1000977. doi:10.1371/journal.pgen.1000977.
- 633 7. Westra HJ, Jansen RC, Fehrmann RS, te Meerman GJ, van Heel D, Wijmenga C, et al.  
634 MixupMapper: correcting sample mix-ups in genome-wide datasets increases power to  
635 detect small genetic effects. *Bioinformatics*. 2011;27 15:2104-11. doi:btr323 [pii]  
636 10.1093/bioinformatics/btr323.

- 637 8. Yoo S, Huang T, Campbell JD, Lee E, Tu Z, Geraci MW, et al. MODMatcher: multi-  
638 omics data matcher for integrative genomic analysis. *PLoS Comput Biol.* 2014;10  
639 8:e1003790. doi:10.1371/journal.pcbi.1003790.
- 640 9. Cibulskis K, McKenna A, Fennell T, Banks E, DePristo M and Getz G. ContEst:  
641 estimating cross-contamination of human samples in next-generation sequencing data.  
642 *Bioinformatics.* 2011;27 18:2601-2. doi:10.1093/bioinformatics/btr446.
- 643 10. Bergmann EA, Chen BJ, Arora K, Vacic V and Zody MC. Conpair: concordance and  
644 contamination estimator for matched tumor-normal pairs. *Bioinformatics.* 2016;32  
645 20:3196-8. doi:10.1093/bioinformatics/btw389.
- 646 11. Brem RB, Yvert G, Clinton R and Kruglyak L. Genetic dissection of transcriptional  
647 regulation in budding yeast. *Science.* 2002;296 5568:752-5.  
648 doi:10.1126/science.1069516.
- 649 12. Ball MP, Li JB, Gao Y, Lee JH, LeProust EM, Park IH, et al. Targeted and genome-scale  
650 strategies reveal gene-body methylation signatures in human cells. *Nat Biotechnol.*  
651 2009;27 4:361-8. doi:10.1038/nbt.1533.
- 652 13. Bolstad BM, Irizarry RA, Astrand M and Speed TP. A comparison of normalization  
653 methods for high density oligonucleotide array data based on variance and bias.  
654 *Bioinformatics.* 2003;19 2:185-93. doi:10.1093/bioinformatics/19.2.185.
- 655 14. Baskerville S and Bartel DP. Microarray profiling of microRNAs reveals frequent  
656 coexpression with neighboring miRNAs and host genes. *RNA.* 2005;11 3:241-7.  
657 doi:10.1261/rna.7240905.
- 658 15. Rodriguez A, Griffiths-Jones S, Ashurst JL and Bradley A. Identification of mammalian  
659 microRNA host genes and transcription units. *Genome Res.* 2004;14 10A:1902-10.  
660 doi:10.1101/gr.2722704.



661 16. Stranger BE, Forrest MS, Dunning M, Ingle CE, Beazley C, Thorne N, et al. Relative  
662 impact of nucleotide and copy number variation on gene expression phenotypes.  
663 Science. 2007;315 5813:848-53. doi:10.1126/science.1136678.

664 17. de Sousa Abreu R, Penalva LO, Marcotte EM and Vogel C. Global signatures of protein  
665 and mRNA expression levels. Mol Biosyst. 2009;5 12:1512-26. doi:10.1039/b908315d.

666

667

## 668 **Figure legends**

669 **Figure 1. Overview of *proMODMatcher* procedure. (A)** Probes in two types of profiles (i.e.  
670 Type A and Type B) were matched by intrinsic biological relationships. **(B)** The significant *cis*-  
671 associations from two different data types were identified by the Spearman correlation. The data  
672 for each *cis* relationship was normal rank-transformed. **(C)** The sample similarity score between  
673 the two types of data  $S(A_i, B_j)$  is defined as Spearman correlation between normal rank-  
674 transformed profiles. **(D)** The *proMODMatcher* evaluated a similarity score of a match,  $S(A_i, B_j)$ ,  
675 by calculating probability of a match estimated based on a score distribution  
676 of  $(S(A_i, B_n), S(A_n, B_j))$ , where  $A_n$  and  $B_n$  represent type A and type B profile of the  $n^{\text{th}}$  matched  
677 profile pairs. **(E)** In the Determine self-aligned vs. cross-aligned step, profile pairs matched by  
678 sample IDs were checked whether their similarity scores were high to be annotated as “self-  
679 aligned”. If not, additional steps were applied to find any potential matches among other  
680 unmatched profiles. The matched profile pairs were used to update significant *cis*-associations.

681  
682 **Figure 2. Application of MODMatcher to simulated data sets.** We simulated data sets with  
683 different numbers of samples and significant *cis*-associations. For variable number of samples  
684 and significant *cis*-associations, sensitivity and false positive rate (FPR, 1-specificity) were  
685 measured and plotted.

686  
687 **Figure 3. Application of *proMODMatcher* to simulated data sets. (A)** For variable number of  
688 samples and significant *cis*-associations specificity and FPR were measured based on  
689 simulated data sets with 0%, 4% and 6% sample labeling error rate. **(B-C)** F measure,  
690 sensitivity, and specificity were compared with MODMatcher’s results.

691

692 **Figure 4. Aligning gene expression profiles by RNAseq and miRNAseq data. (A)** An  
693 example of miRNAs (e.g. miR-452) that are embedded in gene regions (e.g. *GABRE*). **(B)**  
694 Expression level of miR-452 was highly associated with mRNA expression of *GABRE*. **(C)** The  
695 rank of the similarity scores of self-self RNAseq-miRNAseq profiles. **(D)** An example of the  
696 similarity score of the self-aligned profiles, TCGA-D8-A1JH-01. The similarity score between  
697 RNAseq profile of TCGA-D8-A1JH-01 and miRNA profiles of other samples were shown. The  
698 red star indicates similarity score of self-self RNAseq-miRNAseq profiles. **(E)** An example of  
699 non self-aligned RNAseq-miRNA profiles, TCGA-B6-A0X7-01. **(F)** The probabilities of similarity  
700 scores (before multiplying prior probability) for self-aligned RNAseq-miRNAseq profiles. **(G)** An  
701 example of similarity scores of self-aligned RNAseq-miRNA profile pairs. X-axis indicates the  
702 similarity scores between RNAseq profile of TCGA-OL-A6VO-01 and miRNAseq profiles of all  
703 other samples, and y-axis indicates similarity scores between miRNAseq profile of TCGA-OL-  
704 A6VO-01 and RNAseq profiles of all other samples. The red dot indicates similarity score for  
705 self-self RNAseq-miRNAseq profile. **(H)** An example of similarity scores of non self-aligned  
706 RNAseq-miRNA profile pairs.

707

708 **Figure 5. Comparison of MODMatcher and proMODMatcher for aligning expression**  
709 **profiles by RNAseq and miRNAseq data. (A)** The similarity scores of a self-aligned RNAseq-  
710 miRNA profile pair identified by proMODMatcher, but not by MODMatcher. X-axis indicates the  
711 similarity score between RNAseq profile of TCGA-AO-A0JF-01 and miRNAseq profiles of all  
712 other samples, and y-axis indicates similarity score between miRNAseq profile of TCGA-AO-  
713 A0JF-01 and RNAseq profiles of all other samples. The red dot indicates similarity score for  
714 self-self RNAseq-miRNAseq profiles. **(B)** One cross-aligned pair, RNAseq of TCGA-BH-A0BZ-

715 01 and miRNA of TCGA-E2-A15K-01, identified by *proMODMatcher*. The similarity score of the  
716 cross-aligned pair was shown in blue and the similarity scores of self-self alignments was shown  
717 in red. **(C)** Significance levels of *cis*-associations based on profile pairs aligned by MODMatcher  
718 and *proMODMatcher*.

719

720 **Figure 6. Aligning gene expression profiles by Agilent array and miRNAseq data (A)** An  
721 example of possible sample swaps. In alignment of Agilent array and miRNAseq profiles,  
722 TCGA-BH-A18K-01 and TCGA-BH-A18T-01 were cross-aligned to each other. The similarity  
723 scores of each cross-alignment were shown. The similarity score of the cross-aligned pair was  
724 shown in blue and the similarity scores of self-self alignments were shown in red. **(B)** Other  
725 omics profiles of TCGA-BH-A18K and TCGA-BH-A18T were compared with each other and  
726 results were summarized into a patient-centric view. Red line indicates self-aligned, and blue  
727 line indicates cross-aligned. **(C)** After swapping the corresponding mRNA Agilent array profiles,  
728 multiple-omics profiles of TCGA-BH-A18K and TCGA-BH-A18T were aligned to each other  
729 consistently. **(D-F)** The similarity scores of other cross-aligned pairs were shown, and their  
730 available omics profiles and alignment results were summarized into a patient-centric view.

731

732 **Figure 7. Aligning mRNA and RPPA profiles. (A)** The Spearman correlations of protein  
733 abundance and the corresponding mRNA's expression level were shown based on RNAseq and  
734 Agilent array. The red line indicates correlation values corresponding to q-value 0.05. **(B)**  
735 Similarity scores of a self-aligned RNAseq-miRNA profile pair **(C)** Similarity scores of a cross-  
736 aligned RNAseq-miRNA profile pair. **(D)** Similarity scores of the cross-aligned pair between the  
737 mRNA Agilent microarray and RPPA profiles, TCGA-AR-A1AV-01 and TCGA-AR-A1AW-01,  
738 and alignment results for other omics profiles of this pair into a patient centric view.

739

740

741 **Figure 8. Application to TCGA pan-cancer datasets. (A-B)** The self-alignment rate of RNA-  
742 miRNA and RNA-RPPA alignment for each cancer type. **(C-D)** Two possible sample swap  
743 cases of miRNA profiles in the TCGA UCEC and OV datasets. The similarity scores of each  
744 cross-alignment and alignment results for other available omics profiles were shown.

745

746 **Figure 9. Application to ICGC datasets (A)** An example of self-self aligned, non self-self  
747 aligned and cross-aligned pairs of samples based on alignment between Array and CNV profiles  
748 in the NBL-US dataset. **(B)** An example of sample labeling errors. In alignment of Array and  
749 DNA methylation profiles, DO7484 and DO7472 were cross-aligned to each other. The similarity  
750 scores of each cross-alignment are shown. The similarity score of the cross-aligned pair is  
751 shown in blue and the similarity scores of self-self alignments are shown in red. Omics profiles  
752 of DO7484 and DO7472 were compared with each other and results were summarized into a  
753 patient-centric view. Red line indicates self-aligned, and blue line indicates cross-aligned. **(C)** An  
754 example of possible sample swaps and sample labeling errors. DO229525 and DO51109 were  
755 cross-aligned to each other in alignment of RNAseq and DNA methylation profiles as well as  
756 Array and DNA methylation profiles. Additionally, RNAseq and Array profiles of DO51105 were  
757 cross-aligned to DNA methylation profile of DO51091. **(D)** Other omics profiles of these pairs  
758 were compared with each other and results were summarized into a patient-centric view. After  
759 swapping the corresponding DNA methylation profiles, multiple-omics profiles of DO229525 and  
760 DO51109 were aligned to each other consistently.

761

762 **Figure 10. Correcting sample labeling errors. (A)** Mis-labeled samples were outliers when  
763 comparing significant pairs between mRNA and miRNA expression levels in the TCGA BRCA  
764 dataset. Red dots were mis-labeled samples. **(B)** Spearman correlation between expression  
765 levels of miRNAs and their host genes before and after curating sample labeling errors.  
766

**Table 3.** Application of *proMODMatcher* to mRNA and miRNA profiles of TCGA cancer data excluding BRCA.

| Types of cancer | Data types | Data types  | # Common samples | # cis pair | # of self-aligned | # of cross-aligned | Cross-aligned pairs | Self in RNA-CNV        | Cross-aligned pairs |
|-----------------|------------|-------------|------------------|------------|-------------------|--------------------|---------------------|------------------------|---------------------|
|                 | Type1      | Type 2      |                  |            |                   |                    | Type 1              |                        | Type 2              |
| BLCA            | RNAseq     | miRNAseq    | 405              | 187/231    | 402 (99.2%)       | 0                  |                     |                        |                     |
| CESC            | RNAseq     | miRNAseq    | 100              | 132/223    | 100 (100%)        | 0                  |                     |                        |                     |
| COAD            | RNAseq     | miRNAseq    | 248              | 122/191    | 242 (97.5%)       | 8 (3.2%)           | TCGA-CM-4744-01     | Y                      | TCGA-AA-3558-01     |
|                 |            |             |                  |            |                   |                    | TCGA-QL-A97D-01     | Y                      | TCGA-AA-A00W-01     |
|                 |            |             |                  |            |                   |                    | TCGA-A6-A567-01     | Y                      | TCGA-AA-3693-01     |
|                 |            |             |                  |            |                   |                    | TCGA-5M-AATA-01     | Y                      | TCGA-AA-3529-01     |
|                 |            |             |                  |            |                   |                    | TCGA-RU-A8FL-01     | Y                      | TCGA-AZ-4681-01     |
|                 |            |             |                  |            |                   |                    | TCGA-QG-A5YV-01     | Y                      | TCGA-AA-A02H-01     |
|                 |            |             |                  |            |                   |                    | TCGA-A6-A565-01     | Y                      | TCGA-AA-A02E-01     |
|                 |            |             |                  |            |                   |                    | TCGA-5M-AATE-01     | Y                      | TCGA-AA-A01F-01     |
| DLBC            | RNAseq     | miRNAseq    | 47               | 59/210     | 47 (100%)         | 0 (0%)             |                     |                        |                     |
| GBM             | Agilent    | miRNA array | 525              | 73/107     | 307 (58.4%)       | 14(2.6%)           | TCGA-02-0064-01     | Y                      | TCGA-08-0390-01     |
|                 |            |             |                  |            |                   |                    | TCGA-02-0325-01     | Y                      | TCGA-08-0345-01     |
|                 |            |             |                  |            |                   |                    | TCGA-02-0321-01     | Y                      | TCGA-19-0957-01     |
|                 |            |             |                  |            |                   |                    | TCGA-08-0510-01     | Y                      | TCGA-26-5135-01     |
|                 |            |             |                  |            |                   |                    | TCGA-02-0070-01     | Y                      | TCGA-28-5218-01     |
|                 |            |             |                  |            |                   |                    | TCGA-12-0773-01     | Y                      | TCGA-06-0744-01     |
|                 |            |             |                  |            |                   |                    | TCGA-12-0780-01     | Y                      | TCGA-08-0354-01     |
|                 |            |             |                  |            |                   |                    | TCGA-12-0822-01     | Y                      | TCGA-16-1045-01     |
|                 |            |             |                  |            |                   |                    | TCGA-16-1062-01     | Y                      | TCGA-28-5209-01     |
|                 |            |             |                  |            |                   |                    | TCGA-14-1829-01     | Y                      | TCGA-14-1450-01     |
|                 |            |             |                  |            |                   |                    | TCGA-19-1385-01     | Y                      | TCGA-08-0352-01     |
|                 |            |             |                  |            |                   |                    | TCGA-32-4719-01     | Y                      | TCGA-06-0140-01     |
|                 |            |             |                  |            |                   |                    | TCGA-19-5952-01     | Y                      | TCGA-02-0324-01     |
|                 |            |             |                  |            |                   |                    | TCGA-06-0201-01     | No                     | TCGA-06-0141-01     |
|                 | HG-U133    | miRNA array | 520              | 56/100     | 315 (60.5%)       | 5 (0.9%)           | TCGA-02-0058-01     | No:<br>TCGA-06-0190-01 | TCGA-12-0778-01     |

|      |         |             |     |         |             |            |                 |                        |                 |
|------|---------|-------------|-----|---------|-------------|------------|-----------------|------------------------|-----------------|
|      |         |             |     |         |             |            | TCGA-02-0115-01 | Y                      | TCGA-12-0656-01 |
|      |         |             |     |         |             |            | TCGA-19-1789-01 | Y                      | TCGA-06-0413-01 |
|      |         |             |     |         |             |            | TCGA-06-2561-01 | Y                      | TCGA-12-0691-01 |
|      |         |             |     |         |             |            | TCGA-02-0338-01 | Y                      | TCGA-76-6283-01 |
|      | RNAseq  | miRNA array | 151 | 70/129  | 115 (76.1%) | 19 (12.5%) | TCGA-06-1804-01 | Y                      | TCGA-81-5911-01 |
|      |         |             |     |         |             |            | TCGA-06-0178-01 | No                     | TCGA-16-1060-01 |
|      |         |             |     |         |             |            | TCGA-14-1034-01 | Y                      | TCGA-02-0330-01 |
|      |         |             |     |         |             |            | TCGA-15-0742-01 | Y                      | TCGA-02-0116-01 |
|      |         |             |     |         |             |            | TCGA-06-5413-01 | Y                      | TCGA-14-0865-01 |
|      |         |             |     |         |             |            | TCGA-19-2620-01 | Y                      | TCGA-76-6193-01 |
|      |         |             |     |         |             |            | TCGA-06-0158-01 | Y                      | TCGA-06-0174-01 |
|      |         |             |     |         |             |            | TCGA-06-0211-01 | Y                      | TCGA-12-3648-01 |
|      |         |             |     |         |             |            | TCGA-06-2564-01 | Y                      | TCGA-12-0688-01 |
|      |         |             |     |         |             |            | TCGA-06-0141-01 | Y                      | TCGA-08-0246-01 |
|      |         |             |     |         |             |            | TCGA-06-0238-01 | Y                      | TCGA-06-0177-01 |
|      |         |             |     |         |             |            | TCGA-06-0744-01 | Y                      | TCGA-76-6664-01 |
|      |         |             |     |         |             |            | TCGA-06-0125-01 | Y                      | TCGA-08-0358-01 |
|      |         |             |     |         |             |            | TCGA-41-2572-01 | Y                      | TCGA-02-0021-01 |
|      |         |             |     |         |             |            | TCGA-06-0190-02 | Y                      | TCGA-19-5955-01 |
|      |         |             |     |         |             |            | TCGA-28-2499-01 | No:<br>TCGA-02-0099-01 | TCGA-12-1091-01 |
|      |         |             |     |         |             |            | TCGA-06-0152-02 | Y                      | TCGA-26-1799-01 |
|      |         |             |     |         |             |            | TCGA-19-1389-02 | Y                      | TCGA-14-0813-01 |
|      |         |             |     |         |             |            | TCGA-14-1034-02 | Y                      | TCGA-15-1447-01 |
| HNSC | RNAseq  | miRNAseq    | 517 | 183/229 | 494 (95.5%) | 0 (0%)     |                 |                        |                 |
| KIRC | RNAseq  | miRNAseq    | 516 | 146/205 | 487 (94.3%) | 0 (0%)     |                 |                        |                 |
| KIRP | RNAseq  | miRNAseq    | 290 | 131/205 | 285 (98.2%) | 0 (0%)     |                 |                        |                 |
| LAML | RNAseq  | miRNAseq    | 173 | 93/166  | 168 (97.1%) | 0          |                 |                        |                 |
| LGG  | RNAseq  | miRNAseq    | 526 | 170/245 | 500 (95.0%) | 0          |                 |                        |                 |
| LIHC | RNAseq  | miRNAseq    | 369 | 179/228 | 369 (99.4%) | 0          |                 |                        |                 |
| LUAD | RNAseq  | miRNAseq    | 512 | 179/229 | 507 (99.0%) | 0          |                 |                        |                 |
|      | Agilent | miRNAseq    | 32  | 32/180  | 17 (53.1%)  | 3 (9.3%)   | TCGA-44-2655-01 | Y                      | TCGA-44-6148-01 |
|      |         |             |     |         |             |            | TCGA-05-4249-01 | No                     | TCGA-86-A4D0-01 |
|      |         |             |     |         |             |            | TCGA-35-4123-01 | No                     | TCGA-55-6969-01 |
| LUSC | RNAseq  | miRNAseq    | 474 | 191/229 | 466 (98.3%) | 0 (0%)     |                 |                        |                 |



|      |        |          |     |         |             |          |                        |          |                        |
|------|--------|----------|-----|---------|-------------|----------|------------------------|----------|------------------------|
| OV   | RNAseq | miRNAseq | 291 | 159/192 | 282 (96.9%) | 5 (1.7%) | <u>TCGA-24-2261-01</u> | <u>Y</u> | <u>TCGA-31-1953-01</u> |
|      |        |          |     |         |             |          | <u>TCGA-31-1953-01</u> | <u>Y</u> | <u>TCGA-24-2261-01</u> |
|      |        |          |     |         |             |          | TCGA-61-1728-01        | Y        | TCGA-23-2072-01        |
|      |        |          |     |         |             |          | TCGA-09-0369-01        | Y        | TCGA-25-1877-01        |
|      |        |          |     |         |             |          | TCGA-VG-A8LO-01        | Y        | TCGA-04-1654-01        |
| PRAD | RNAseq | miRNAseq | 494 | 129/198 | 432 (87.4%) | 0        |                        |          |                        |
| READ | RNAseq | miRNAseq | 66  | 77/180  | 60 (90.9%)  | 3 (4.5%) | TCGA-AG-A01J-01        | Y        | TCGA-DY-A1DG-01        |
|      |        |          |     |         |             |          | TCGA-AG-A014-01        | Y        | TCGA-DC-6158-01        |
|      |        |          |     |         |             |          | TCGA-AG-A023-01        | Y        | TCGA-AG-4022-01        |
| SARC | RNAseq | miRNAseq | 261 | 169/220 | 261 (100%)  | 0        |                        |          |                        |
| SKCM | RNAseq | miRNAseq | 449 | 203/251 | 446 (99.3%) | 0        |                        |          |                        |
| STAD | RNAseq | miRNAseq | 377 | 193/256 | 371 (98.4%) | 0        |                        |          |                        |
| THCA | RNAseq | miRNAseq | 508 | 139/217 | 483 (95.0%) | 0        |                        |          |                        |
| UCEC | RNAseq | miRNAseq | 361 | 169/240 | 354 (98.0%) | 4 (1.1%) | TCGA-A5-A0GP-01        | Y        | TCGA-AJ-A2QO-01        |
|      |        |          |     |         |             |          | <u>TCGA-AX-A1C4-01</u> | <u>Y</u> | <u>TCGA-AX-A1CI-01</u> |
|      |        |          |     |         |             |          | <u>TCGA-AX-A1CI-01</u> | <u>Y</u> | <u>TCGA-AX-A1C4-01</u> |
|      |        |          |     |         |             |          | TCGA-BG-A220-01        | No       | TCGA-AJ-A3NE-01        |

Underlines indicates sample swaps

768  
769  
770  
  
771  
  
772  
  
773  
  
774  
  
775  
  
776

778 **Table 4.** Application of *proMODMatcher* to mRNA and RPPA profiles of TCGA cancer data excluding BRCA

| Types of cancer | Data types | Data types | # Common samples | # cis pair | # of self-aligned | # of cross-aligned | Cross-aligned pairs | Self in RNA-CNV | Cross-aligned pairs |
|-----------------|------------|------------|------------------|------------|-------------------|--------------------|---------------------|-----------------|---------------------|
|                 | Type1      | Type 2     | Type 1           |            |                   |                    | Type 1              |                 | Type 2              |
| BLCA            | RNAseq     | RPPA       | 340              | 121/193    | 297 (87.3%)       | 3 (0.8%)           | TCGA-XF-AAN8-01     | Y               | TCGA-FD-A6TB-01     |
|                 |            |            |                  |            |                   |                    | TCGA-FD-A5BR-01     | Y               | TCGA-XF-AAMF-01     |
|                 |            |            |                  |            |                   |                    | TCGA-E7-A6ME-01     | Y               | TCGA-E7-A541-01     |
| CESC            | RNAseq     | RPPA       | 172              | 101/184    | 152 (88.8%)       | 1 (0.5%)           | TCGA-EK-A3GJ-01     | Y               | TCGA-C5-A8XI-01     |
| COAD            | RNAseq     | RPPA       | 240              | 110/202    | 195 (81.2%)       | 15 (6.2%)          | TCGA-G4-6321-01     | Y               | TCGA-AA-A01P-01     |
|                 |            |            |                  |            |                   |                    | TCGA-AD-A5EJ-01     | Y               | TCGA-AA-3672-01     |
|                 |            |            |                  |            |                   |                    | TCGA-CA-5256-01     | Y               | TCGA-AA-3815-01     |
|                 |            |            |                  |            |                   |                    | TCGA-AZ-4682-01     | Y               | TCGA-G4-6321-01     |
|                 |            |            |                  |            |                   |                    | TCGA-G4-6303-01     | Y               | TCGA-A6-2677-01     |
|                 |            |            |                  |            |                   |                    | TCGA-A6-6137-01     | Y               | TCGA-AA-A01S-01     |
|                 |            |            |                  |            |                   |                    | TCGA-G4-6627-01     | Y               | TCGA-G4-6298-01     |
|                 |            |            |                  |            |                   |                    | TCGA-A6-6140-01     | Y               | TCGA-AA-3519-01     |
|                 |            |            |                  |            |                   |                    | TCGA-NH-A5IV-01     | Y               | TCGA-AA-A00E-01     |
|                 |            |            |                  |            |                   |                    | TCGA-G4-6320-01     | Y               | TCGA-A6-2672-01     |
|                 |            |            |                  |            |                   |                    | TCGA-DM-A28H-01     | Y               | TCGA-AA-3811-01     |
|                 |            |            |                  |            |                   |                    | TCGA-CK-5913-01     | Y               | TCGA-AA-3664-01     |
|                 |            |            |                  |            |                   |                    | TCGA-NH-A50U-01     | Y               | TCGA-AA-3558-01     |
|                 |            |            |                  |            |                   |                    | TCGA-AD-6901-01     | Y               | TCGA-NH-A6GC-06     |
|                 |            |            |                  |            |                   |                    | TCGA-A6-A565-01     | Y               | TCGA-AA-3520-01     |
| DLBC            | RNAseq     | RPPA       | 33               | 58/184     | 32 (96.9%)        | 0 (0%)             |                     |                 |                     |
| GBM             | Agilent    | RPPA       | 191              | 97/194     | 157 (82.1%)       | 13 (6.8%)          | TCGA-06-0139-01     | No              | TCGA-06-A5U1-01     |
|                 |            |            |                  |            |                   |                    | TCGA-06-0158-01     | Y               | TCGA-19-5950-01     |
|                 |            |            |                  |            |                   |                    | TCGA-06-0176-01     | Y               | TCGA-19-2625-01     |
|                 |            |            |                  |            |                   |                    | TCGA-06-0206-01     | Y               | TCGA-06-0190-02     |
|                 |            |            |                  |            |                   |                    | TCGA-12-0620-01     | Y               | TCGA-RR-A6KC-01     |
|                 |            |            |                  |            |                   |                    | TCGA-06-0881-01     | Y               | TCGA-02-0003-01     |

|      |         |      |     |         |             |           |                        |          |                        |
|------|---------|------|-----|---------|-------------|-----------|------------------------|----------|------------------------|
|      |         |      |     |         |             |           | TCGA-14-1454-01        | Y        | TCGA-19-A6J5-01        |
|      |         |      |     |         |             |           | <b>TCGA-12-1091-01</b> | <b>Y</b> | <b>TCGA-14-1034-02</b> |
|      |         |      |     |         |             |           | TCGA-14-1037-01        | No       | TCGA-19-A60I-01        |
|      |         |      |     |         |             |           | TCGA-14-1795-01        | Y        | TCGA-12-5301-01        |
|      |         |      |     |         |             |           | TCGA-32-2616-01        | Y        | TCGA-06-5858-01        |
|      |         |      |     |         |             |           | TCGA-81-5911-01        | Y        | TCGA-19-1389-02        |
|      |         |      |     |         |             |           | TCGA-14-1450-01        | Y        | TCGA-06-5418-01        |
|      | HG-U133 | RPPA | 186 | 90/187  | 147 (79.0%) | 13 (6.9%) | TCGA-02-0068-01        | Y        | TCGA-06-5413-01        |
|      |         |      |     |         |             |           | TCGA-02-0033-01        | No       | TCGA-32-4211-01        |
|      |         |      |     |         |             |           | TCGA-14-0781-01        | Y        | TCGA-74-6575-01        |
|      |         |      |     |         |             |           | <b>TCGA-12-1091-01</b> | <b>Y</b> | <b>TCGA-14-1034-02</b> |
|      |         |      |     |         |             |           | TCGA-28-2509-01        | Y        | TCGA-19-A60I-01        |
|      |         |      |     |         |             |           | TCGA-06-0141-01        | Y        | TCGA-06-A5U1-01        |
|      |         |      |     |         |             |           | TCGA-06-0160-01        | Y        | TCGA-06-6700-01        |
|      |         |      |     |         |             |           | TCGA-06-0394-01        | Y        | TCGA-74-6578-01        |
|      |         |      |     |         |             |           | TCGA-08-0518-01        | Y        | TCGA-26-6173-01        |
|      |         |      |     |         |             |           | TCGA-08-0512-01        | Y        | TCGA-19-1389-02        |
|      |         |      |     |         |             |           | TCGA-02-0330-01        | Y        | TCGA-06-A6S1-01        |
|      |         |      |     |         |             |           | TCGA-32-2491-01        | Y        | TCGA-06-6698-01        |
|      |         |      |     |         |             |           | TCGA-32-4719-01        | Y        | TCGA-06-0876-01        |
|      | RNAseq  | RPPA | 83  | 106/201 | 75 (90.3%)  | 25        |                        |          |                        |
| HNSC | RNAseq  | RPPA | 212 | 82/156  | 175 (82.5%) | 3 (1.4%)  | TCGA-CQ-6222-01        | No       | TCGA-CV-5439-01        |
|      |         |      |     |         |             |           | TCGA-D6-6824-01        | Y        | TCGA-CV-5976-01        |
|      |         |      |     |         |             |           | TCGA-MZ-A7D7-01        | Y        | TCGA-CN-6011-01        |
| KIRC | RNAseq  | RPPA | 475 | 125/209 | 396 (83.3%) | 4 (0.8%)  | TCGA-CJ-5681-01        | Y        | TCGA-B0-5709-01        |
|      |         |      |     |         |             |           | TCGA-B0-5709-01        | Y        | TCGA-CJ-6030-01        |
|      |         |      |     |         |             |           | TCGA-CJ-4869-01        | Y        | TCGA-BP-4771-01        |
|      |         |      |     |         |             |           | TCGA-CJ-4888-01        | Y        | TCGA-CJ-4875-01        |
| KIRP | RNAseq  | RPPA | 215 | 93/184  | 178 (82.7%) | 3 (1.3%)  | TCGA-KV-A74V-01        | Y        | TCGA-MH-A55Z-01        |
|      |         |      |     |         |             |           | TCGA-MH-A854-01        | Y        | TCGA-UZ-A9PL-01        |
|      |         |      |     |         |             |           | TCGA-MH-A561-01        | Y        | TCGA-B1-A47N-01        |
| LGG  | RNAseq  | RPPA | 435 | 95/173  | 320 (73.5%) | 1 (0.2%)  | TCGA-HT-7681-01        | Y        | TCGA-P5-A737-01        |
| LIHC | RNAseq  | RPPA | 181 | 105/214 | 158 (87.2%) | 4 (2.2%)  | TCGA-ZS-A9CD-01        | Y        | TCGA-G3-A5SK-01        |
|      |         |      |     |         |             |           | TCGA-DD-AAC9-01        | Y        | TCGA-DD-A4NG-01        |
|      |         |      |     |         |             |           | TCGA-G3-AAV0-01        | Y        | TCGA-GJ-A9DB-01        |

|      |         |      |     |         |             |           |                 |    |                 |
|------|---------|------|-----|---------|-------------|-----------|-----------------|----|-----------------|
|      |         |      |     |         |             |           | TCGA-G3-AAV5-01 | Y  | TCGA-ED-A627-01 |
| LUAD | RNAseq  | RPPA | 360 | 125/193 | 312 (86.6%) | 10 (2.7%) | TCGA-50-5045-01 | No | TCGA-44-7672-01 |
|      |         |      |     |         |             |           | TCGA-44-7667-01 | Y  | TCGA-44-3917-01 |
|      |         |      |     |         |             |           | TCGA-MP-A4TI-01 | Y  | TCGA-MP-A4TA-01 |
|      |         |      |     |         |             |           | TCGA-MP-A4TJ-01 | Y  | TCGA-50-5939-01 |
|      |         |      |     |         |             |           | TCGA-50-5055-01 | No | TCGA-97-A4M2-01 |
|      |         |      |     |         |             |           | TCGA-55-A48X-01 | Y  | TCGA-64-5778-01 |
|      |         |      |     |         |             |           | TCGA-64-5775-01 | No | TCGA-05-5715-01 |
|      |         |      |     |         |             |           | TCGA-55-6987-01 | Y  | TCGA-44-2664-01 |
|      |         |      |     |         |             |           | TCGA-38-7271-01 | Y  | TCGA-50-5068-01 |
|      |         |      |     |         |             |           | TCGA-55-8208-01 | Y  | TCGA-50-5066-01 |
|      | Agilent | RPPA | 23  | 34/187  | 14 (60.8%)  | 7 (30.4%) | TCGA-44-2661-01 | No | TCGA-05-4249-01 |
|      |         |      |     |         |             |           | TCGA-05-4249-01 | No | TCGA-55-6978-01 |
|      |         |      |     |         |             |           | TCGA-44-3398-01 | No | TCGA-86-A4JF-01 |
|      |         |      |     |         |             |           | TCGA-44-4112-01 | No | TCGA-44-3919-01 |
|      |         |      |     |         |             |           | TCGA-44-2662-01 | Y  | TCGA-78-7145-01 |
|      |         |      |     |         |             |           | TCGA-67-3774-01 | Y  | TCGA-73-7498-01 |
|      |         |      |     |         |             |           | TCGA-35-3621-01 | No | TCGA-44-2661-01 |
| LUSC | RNAseq  | RPPA | 324 | 125/193 | 278 (85.8%) | 3 (0.9%)  | TCGA-18-4086-01 | Y  | TCGA-63-5131-01 |
|      |         |      |     |         |             |           | TCGA-39-5039-01 | Y  | TCGA-34-2604-01 |
|      |         |      |     |         |             |           | TCGA-56-A4ZJ-01 | Y  | TCGA-90-6837-01 |
| OV   | RNAseq  | RPPA | 241 | 134/202 | 232 (96.2%) | 9 (3.7%)  | TCGA-61-2095-01 | Y  | TCGA-42-2587-01 |
|      |         |      |     |         |             |           | TCGA-09-0364-01 | Y  | TCGA-29-1774-01 |
|      |         |      |     |         |             |           | TCGA-09-2048-01 | Y  | TCGA-13-0802-01 |
|      |         |      |     |         |             |           | TCGA-13-0890-01 | Y  | TCGA-42-2590-01 |
|      |         |      |     |         |             |           | TCGA-24-2035-01 | Y  | TCGA-30-1892-01 |
|      |         |      |     |         |             |           | TCGA-25-1870-01 | Y  | TCGA-36-2534-01 |
|      |         |      |     |         |             |           | TCGA-31-1956-01 | Y  | TCGA-29-1768-01 |
|      |         |      |     |         |             |           | TCGA-57-1583-01 | Y  | TCGA-61-1916-01 |
|      |         |      |     |         |             |           | TCGA-59-2350-01 | Y  | TCGA-61-1913-01 |
| PRAD | RNAseq  | RPPA | 351 | 96/178  | 209 (59.5%) | 9 (2.5%)  | TCGA-VN-A88I-01 | Y  | TCGA-KC-A4BV-01 |
|      |         |      |     |         |             |           | TCGA-KC-A7F3-01 | Y  | TCGA-ZG-A8QX-01 |
|      |         |      |     |         |             |           | TCGA-FC-A6HD-01 | No | TCGA-EJ-A8FN-01 |
|      |         |      |     |         |             |           | TCGA-EJ-5499-01 | Y  | TCGA-VN-A88L-01 |
|      |         |      |     |         |             |           | TCGA-HC-7230-01 | Y  | TCGA-HC-7748-01 |

|      |        |      |     |         |             |           |                 |    |                 |
|------|--------|------|-----|---------|-------------|-----------|-----------------|----|-----------------|
|      |        |      |     |         |             |           | TCGA-XJ-A83G-01 | Y  | TCGA-G9-6338-01 |
|      |        |      |     |         |             |           | TCGA-HC-A8CY-01 | Y  | TCGA-V1-A9Z8-01 |
|      |        |      |     |         |             |           | TCGA-HC-7821-01 | Y  | TCGA-YL-A9WL-01 |
|      |        |      |     |         |             |           | TCGA-VP-A87C-01 | Y  | TCGA-EJ-8470-01 |
| READ | RNAseq | RPPA | 55  | 54/202  | 43 (78.1%)  | 4 (7.2%)  | TCGA-AG-A00H-01 | Y  | TCGA-F5-6810-01 |
|      |        |      |     |         |             |           | TCGA-AG-3584-01 | Y  | TCGA-AG-4022-01 |
|      |        |      |     |         |             |           | TCGA-AG-3883-01 | Y  | TCGA-AG-4005-01 |
|      |        |      |     |         |             |           | TCGA-AG-3575-01 | Y  | TCGA-F5-6863-01 |
| SARC | RNAseq | RPPA | 224 | 110/184 | 219 (97.7%) | 0         |                 |    |                 |
| SKCM | RNAseq | RPPA | 352 | 128/193 | 314 (89.2%) | 2         | TCGA-EB-A44N-01 | Y  | TCGA-EB-A5UM-01 |
|      |        |      |     |         |             |           | TCGA-W3-A828-06 | Y  | TCGA-EB-A551-01 |
| STAD | RNAseq | RPPA | 306 | 103/177 | 233 (76.1%) | 12 (3.9%) | TCGA-D7-6818-01 | Y  | TCGA-EQ-8122-01 |
|      |        |      |     |         |             |           | TCGA-HU-A4H3-01 | Y  | TCGA-CG-4442-01 |
|      |        |      |     |         |             |           | TCGA-SW-A7EB-01 | Y  | TCGA-CG-4460-01 |
|      |        |      |     |         |             |           | TCGA-VQ-A94P-01 | Y  | TCGA-RD-A8NB-01 |
|      |        |      |     |         |             |           | TCGA-ZA-A8F6-01 | Y  | TCGA-CG-4476-01 |
|      |        |      |     |         |             |           | TCGA-FP-8210-01 | Y  | TCGA-D7-A4Z0-01 |
|      |        |      |     |         |             |           | TCGA-HU-8244-01 | Y  | TCGA-BR-4371-01 |
|      |        |      |     |         |             |           | TCGA-HU-8604-01 | Y  | TCGA-BR-A4QL-01 |
|      |        |      |     |         |             |           | TCGA-HU-A4GJ-01 | Y  | TCGA-CD-A4MI-01 |
|      |        |      |     |         |             |           | TCGA-HU-A4H8-01 | Y  | TCGA-CG-5720-01 |
|      |        |      |     |         |             |           | TCGA-R5-A7ZI-01 | Y  | TCGA-BR-6710-01 |
|      |        |      |     |         |             |           | TCGA-VQ-A927-01 | Y  | TCGA-F1-A72C-01 |
| THCA | RNAseq | RPPA | 222 | 55/167  | 142 (63.9%) | 3 (1.3%)  | TCGA-EM-A3FJ-01 | No | TCGA-EM-A2CS-06 |
|      |        |      |     |         |             |           | TCGA-DJ-A4UW-01 | No | TCGA-EL-A3CU-01 |
|      |        |      |     |         |             |           | TCGA-ET-A3BQ-01 | No | TCGA-EL-A3GR-01 |
| UCEC | RNAseq | RPPA | 300 | 115/187 | 270 (90%)   | 15 (5%)   | TCGA-AX-A05Y-01 | Y  | TCGA-AX-A060-01 |
|      |        |      |     |         |             |           | TCGA-AX-A05Z-01 | Y  | TCGA-EO-A3AV-01 |

|  |  |  |  |  |  |  |                 |    |                 |
|--|--|--|--|--|--|--|-----------------|----|-----------------|
|  |  |  |  |  |  |  | TCGA-AX-A0IW-01 | Y  | TCGA-KP-A3VZ-01 |
|  |  |  |  |  |  |  | TCGA-D1-A163-01 | Y  | TCGA-AJ-A3BH-01 |
|  |  |  |  |  |  |  | TCGA-D1-A1NZ-01 | Y  | TCGA-E6-A2P9-01 |
|  |  |  |  |  |  |  | TCGA-EO-A22T-01 | Y  | TCGA-B5-A1MW-01 |
|  |  |  |  |  |  |  | TCGA-FI-A2F9-01 | Y  | TCGA-A5-A1OH-01 |
|  |  |  |  |  |  |  | TCGA-BG-A0MQ-01 | Y  | TCGA-A5-A7WJ-01 |
|  |  |  |  |  |  |  | TCGA-BG-A0MO-01 | Y  | TCGA-BK-A13B-01 |
|  |  |  |  |  |  |  | TCGA-D1-A17A-01 | Y  | TCGA-A5-A0GB-01 |
|  |  |  |  |  |  |  | TCGA-BS-A0TE-01 | Y  | TCGA-AJ-A3EK-01 |
|  |  |  |  |  |  |  | TCGA-BS-A0UL-01 | Y  | TCGA-EO-A22T-01 |
|  |  |  |  |  |  |  | TCGA-FI-A2CX-01 | Y  | TCGA-E6-A2P8-01 |
|  |  |  |  |  |  |  | TCGA-B5-A11M-01 | No | TCGA-EY-A1GW-01 |
|  |  |  |  |  |  |  | TCGA-FI-A2D6-01 | Y  | TCGA-DF-A2KY-01 |

779 The **bold** indicates cross-alignments supported by other data.

780

781

782

783

**A. Identify *cis*-associations**

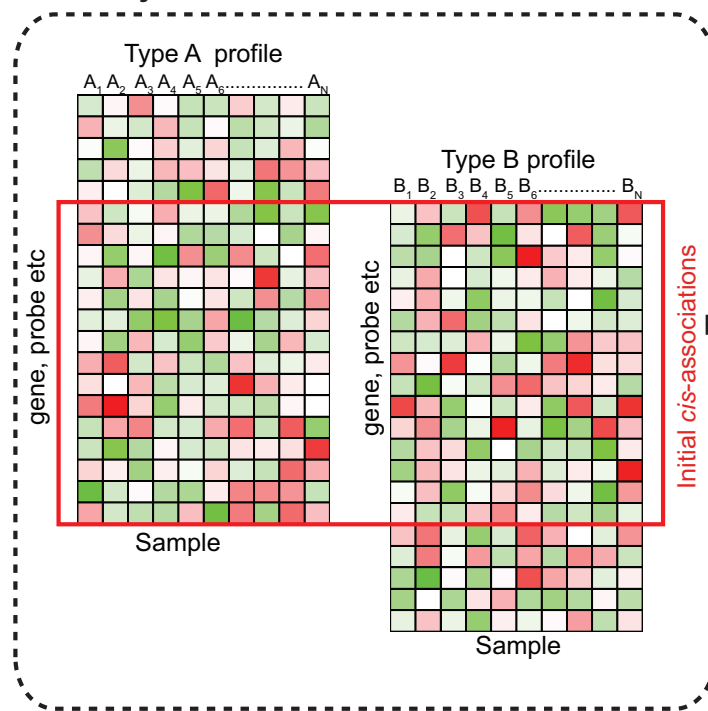

**B. Identify significant *cis*-associations**

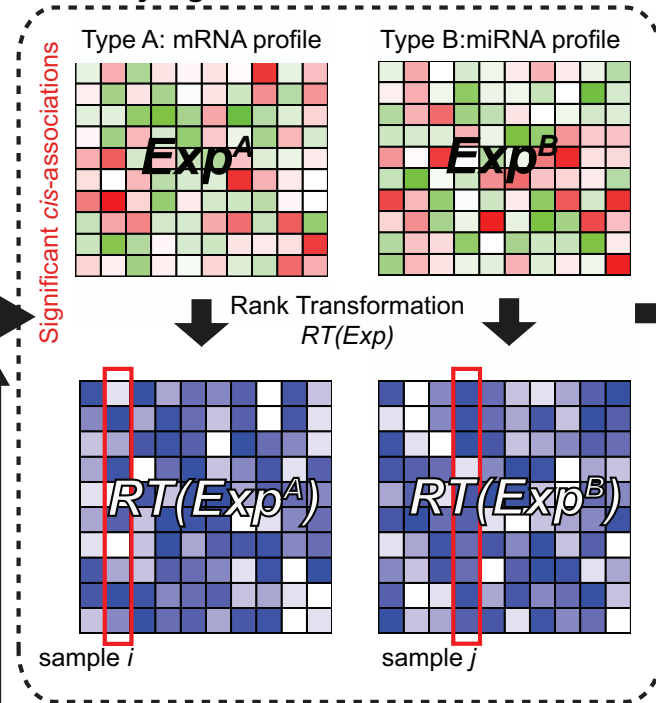

**C. Measure similarity scores**

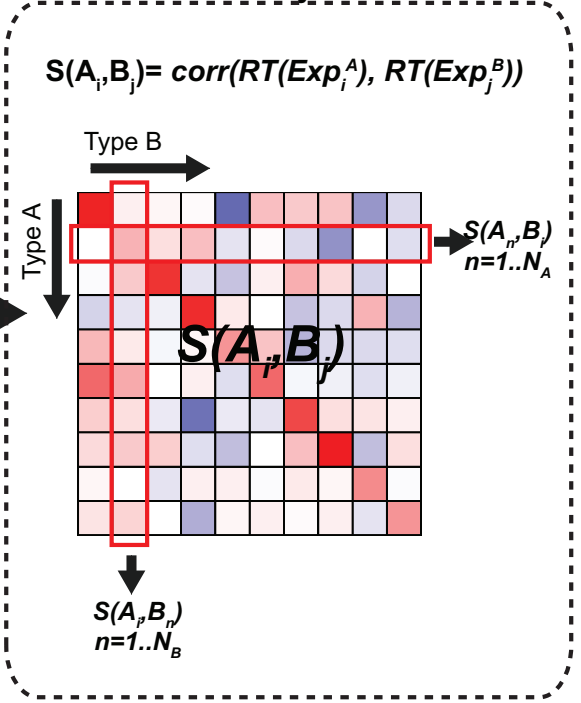

**D. Calculate probability based on bivariate normal distribution**

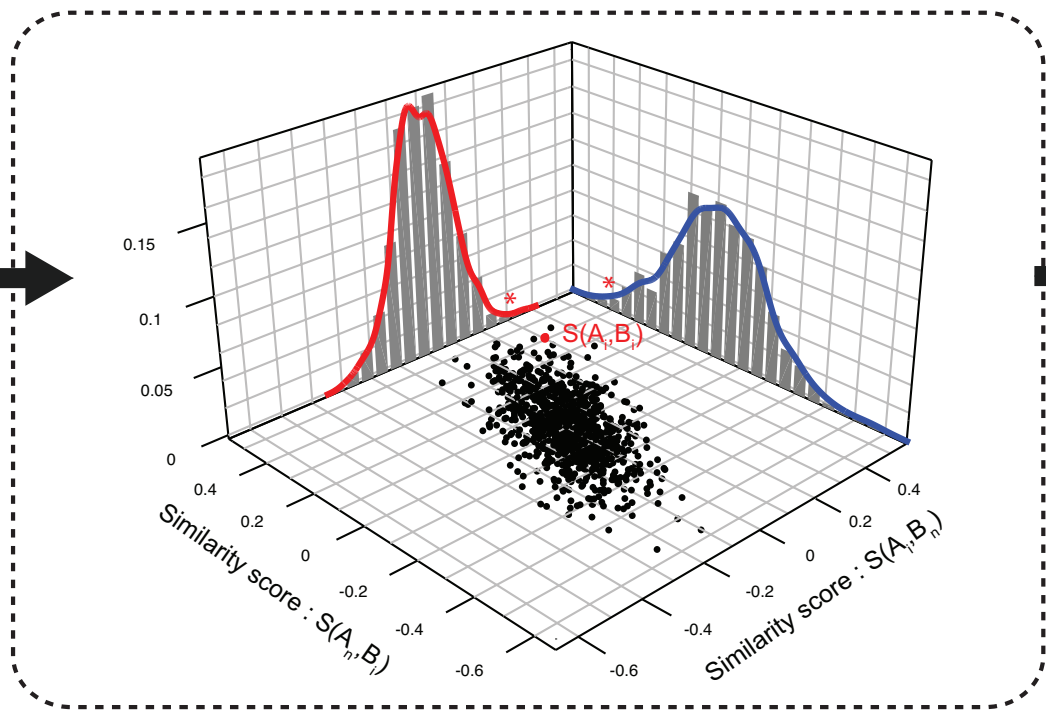

**E. Determine self vs. cross-alignments**

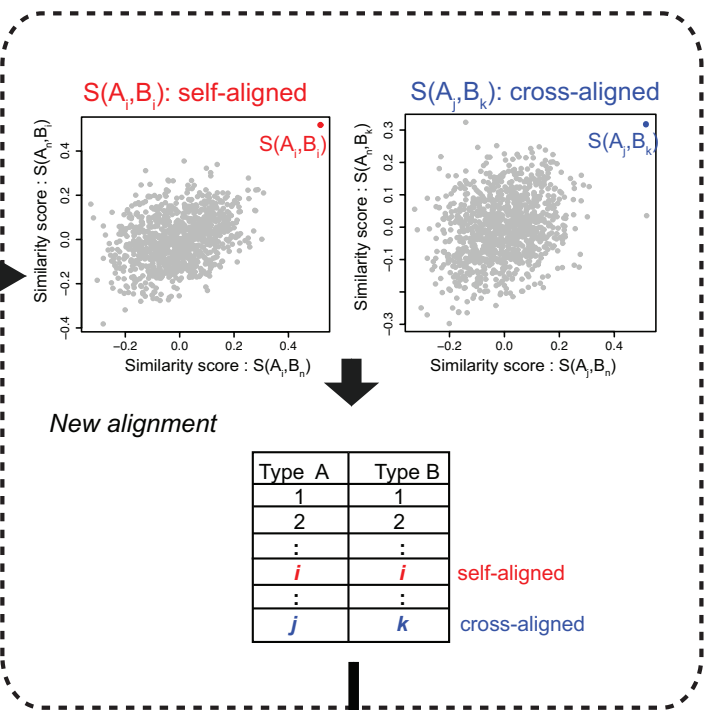

**F. Update significant *cis*-associations**

Figure 2

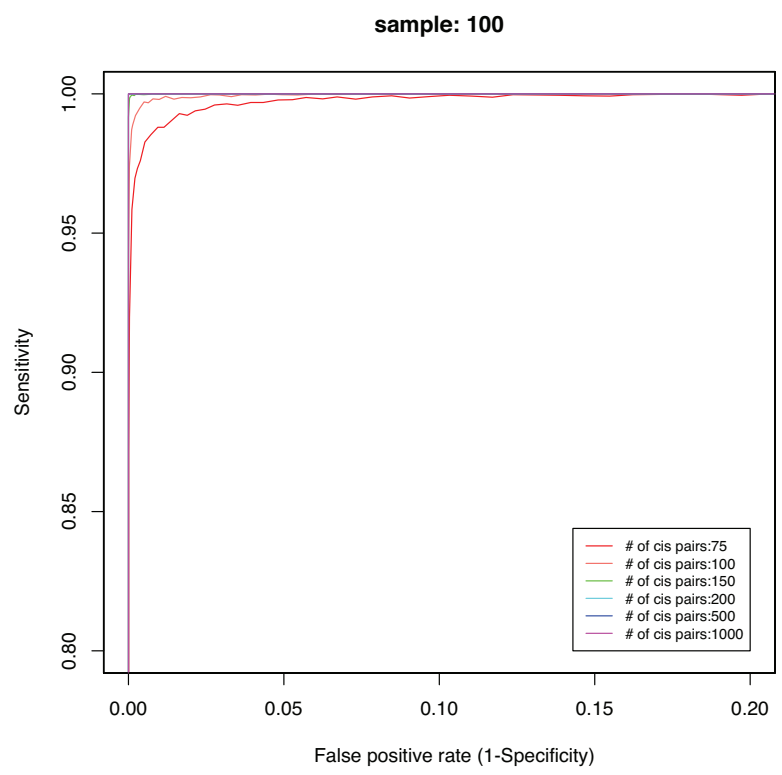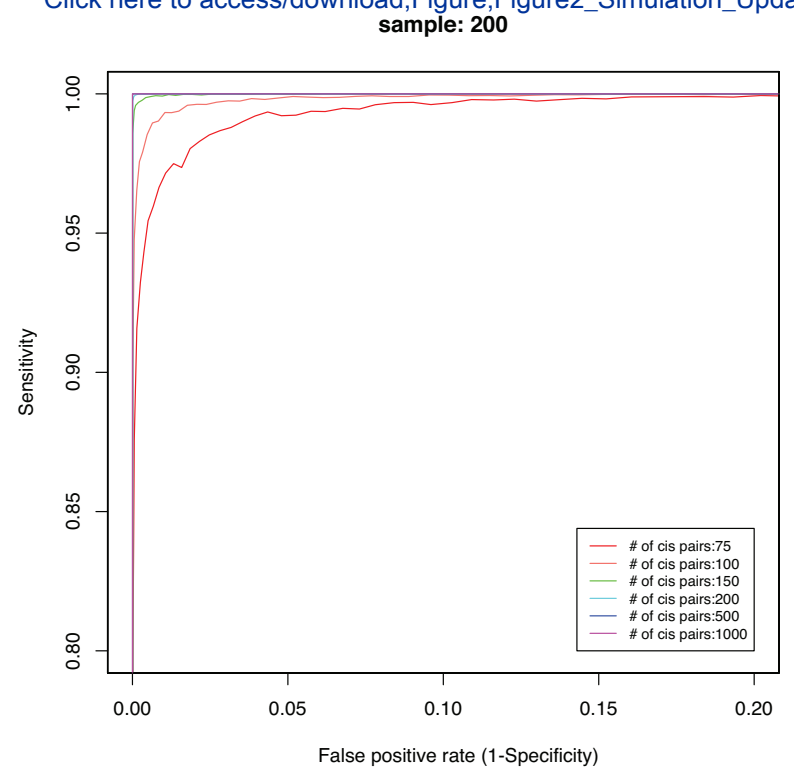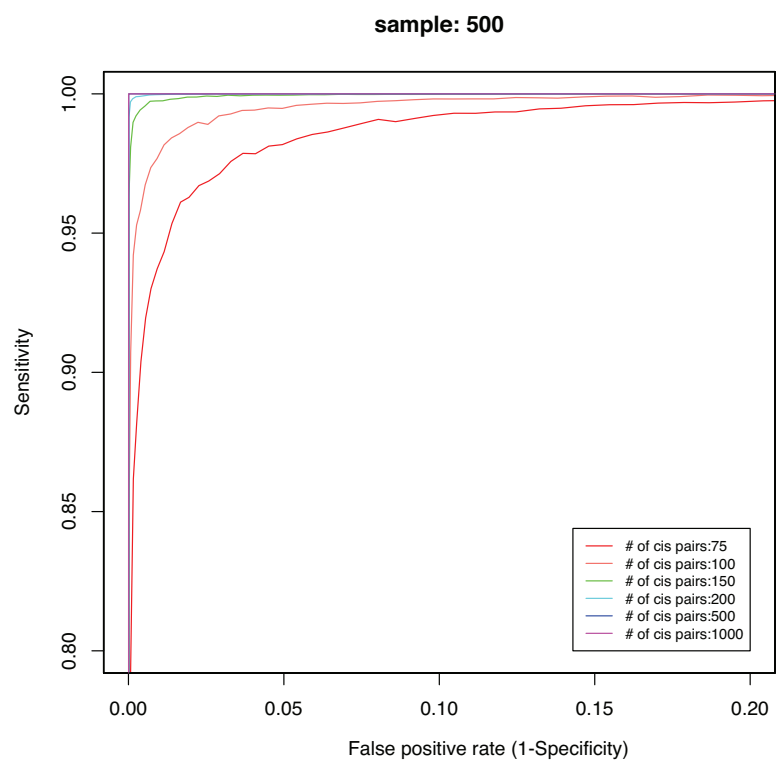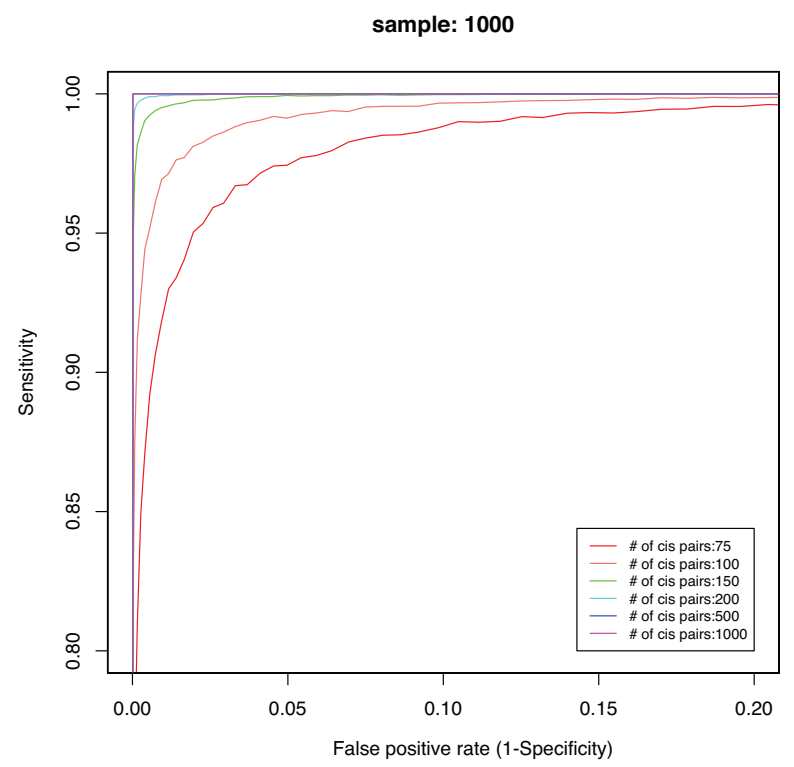



Figure 3

Click here to access/download;Figure;Figure3\_MeasurementsCompareMOD\_

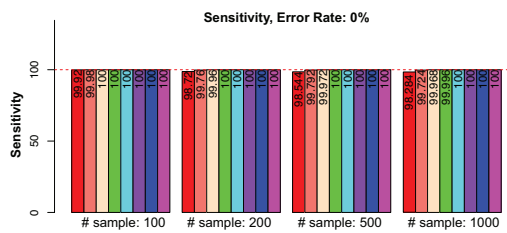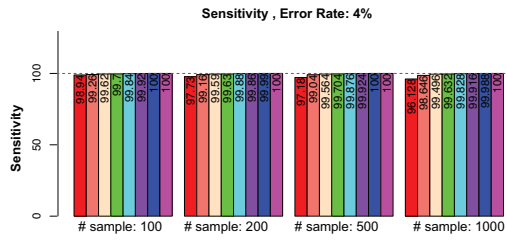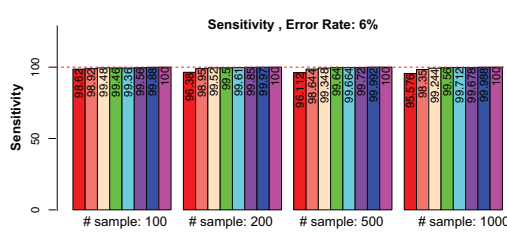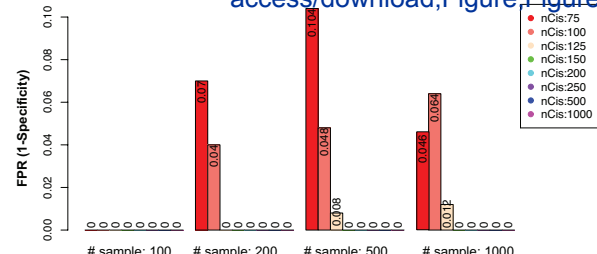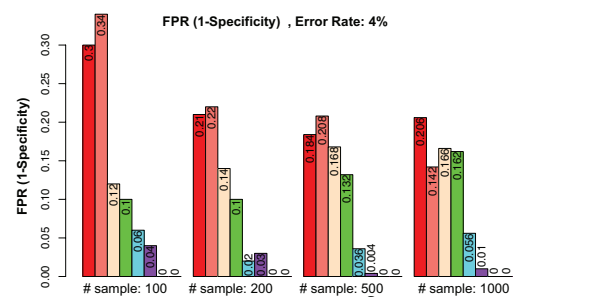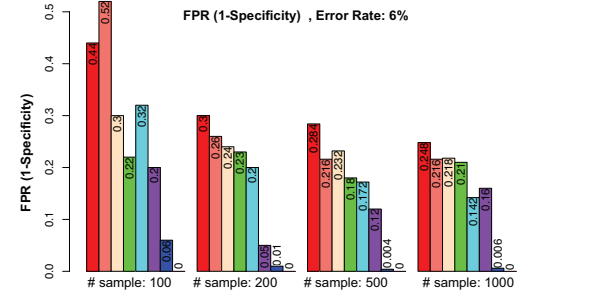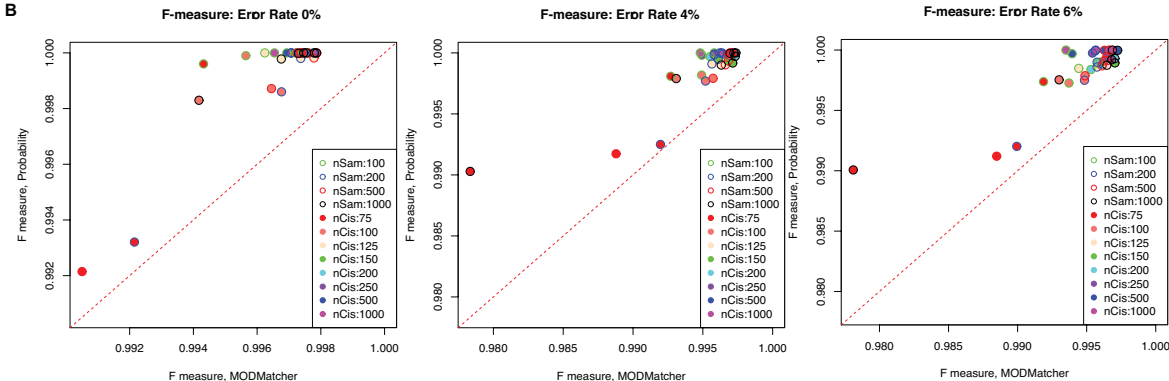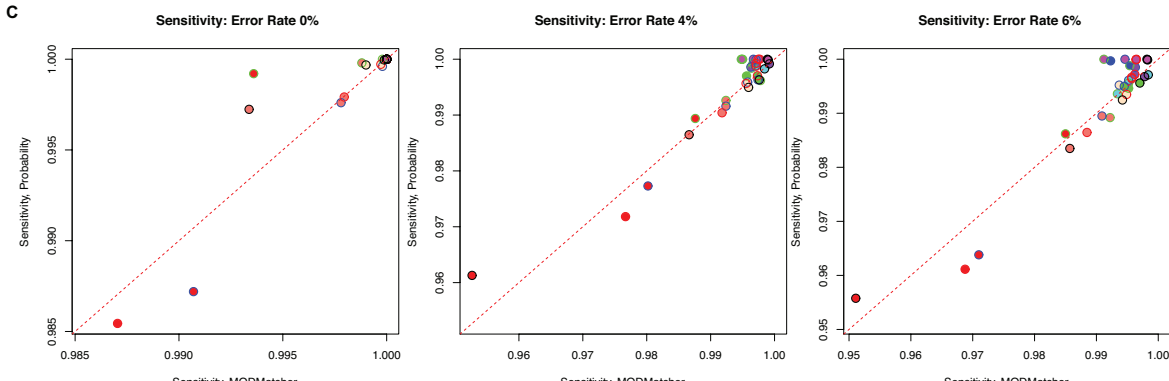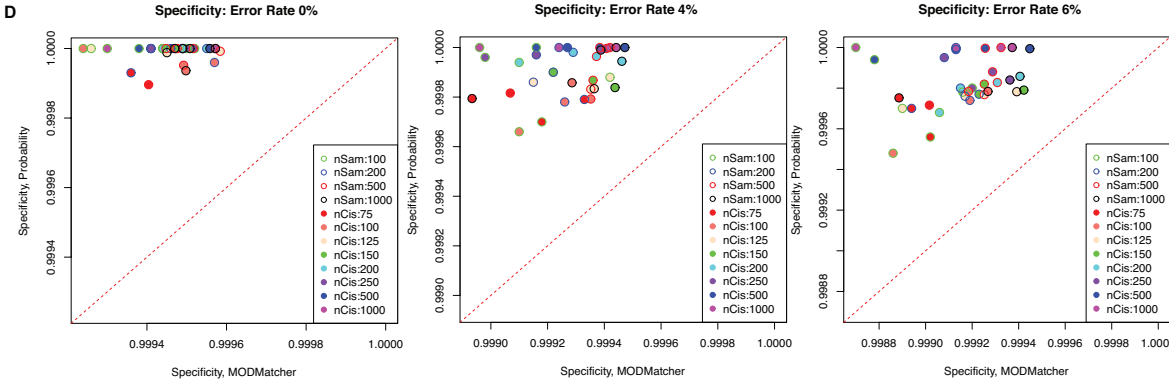

**A. Detect miRNA-host gene pair**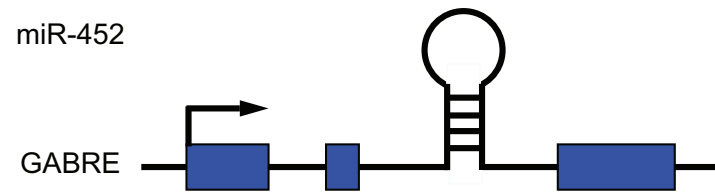**B. Identify co-transcribed miRNA-mRNA pairs**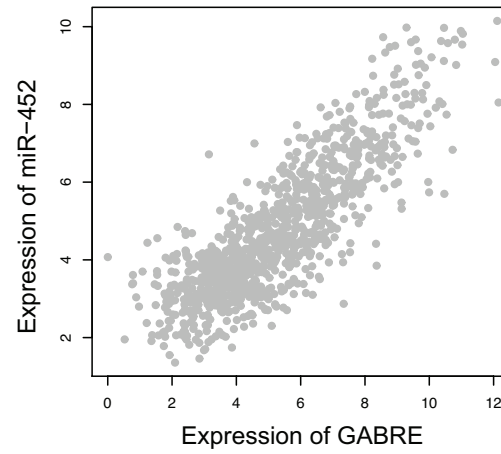**C. Rank of self-self correlation**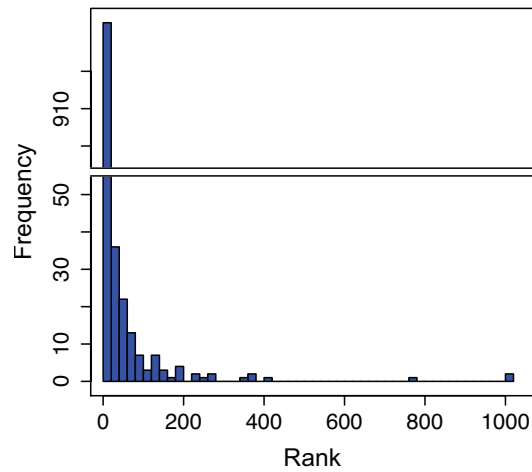**D. TCGA-D8-A1JH-01**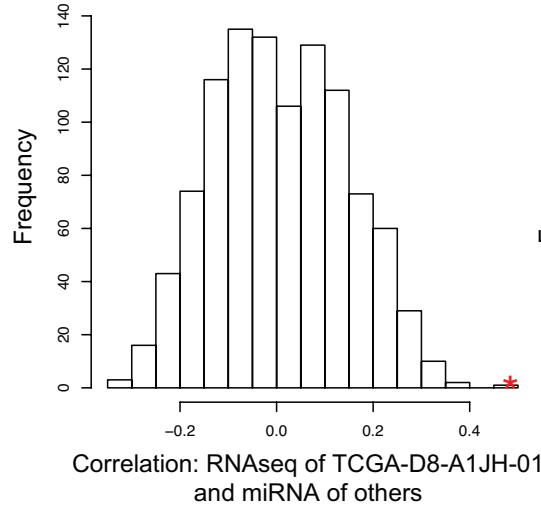**E. TCGA-B6-A0X7-01**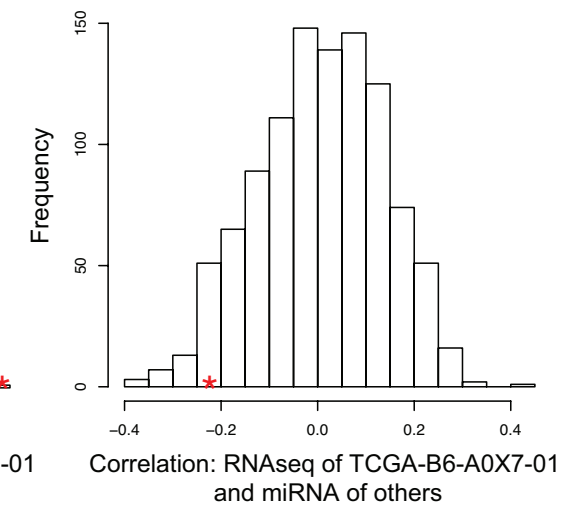**F. Probability of self-alignment**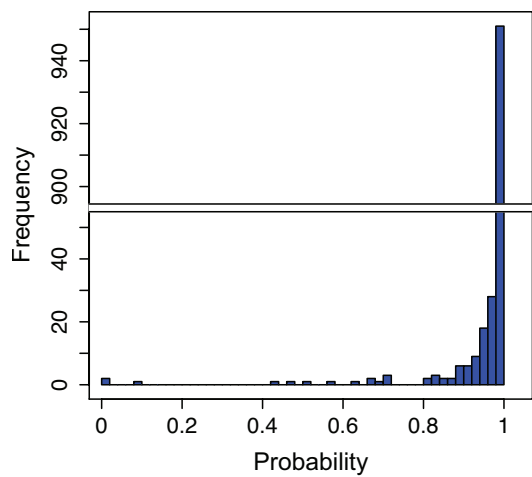**G. TCGA-OL-A6VO-01**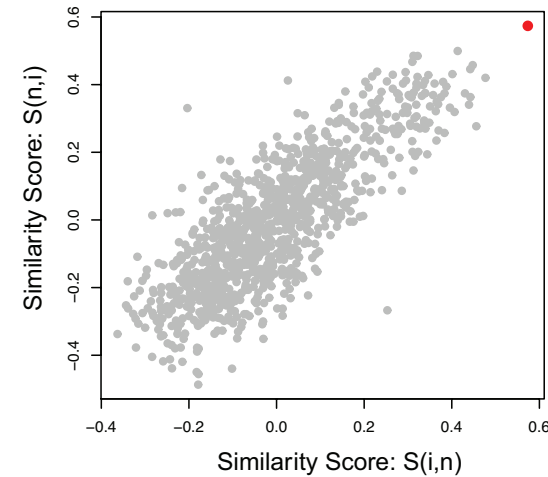**H. TCGA-AO-A128-01**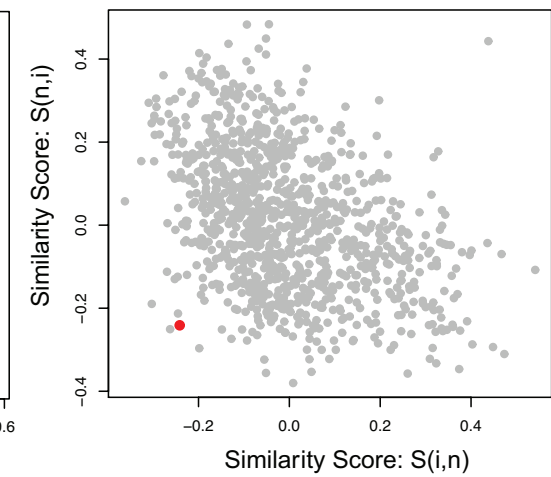

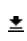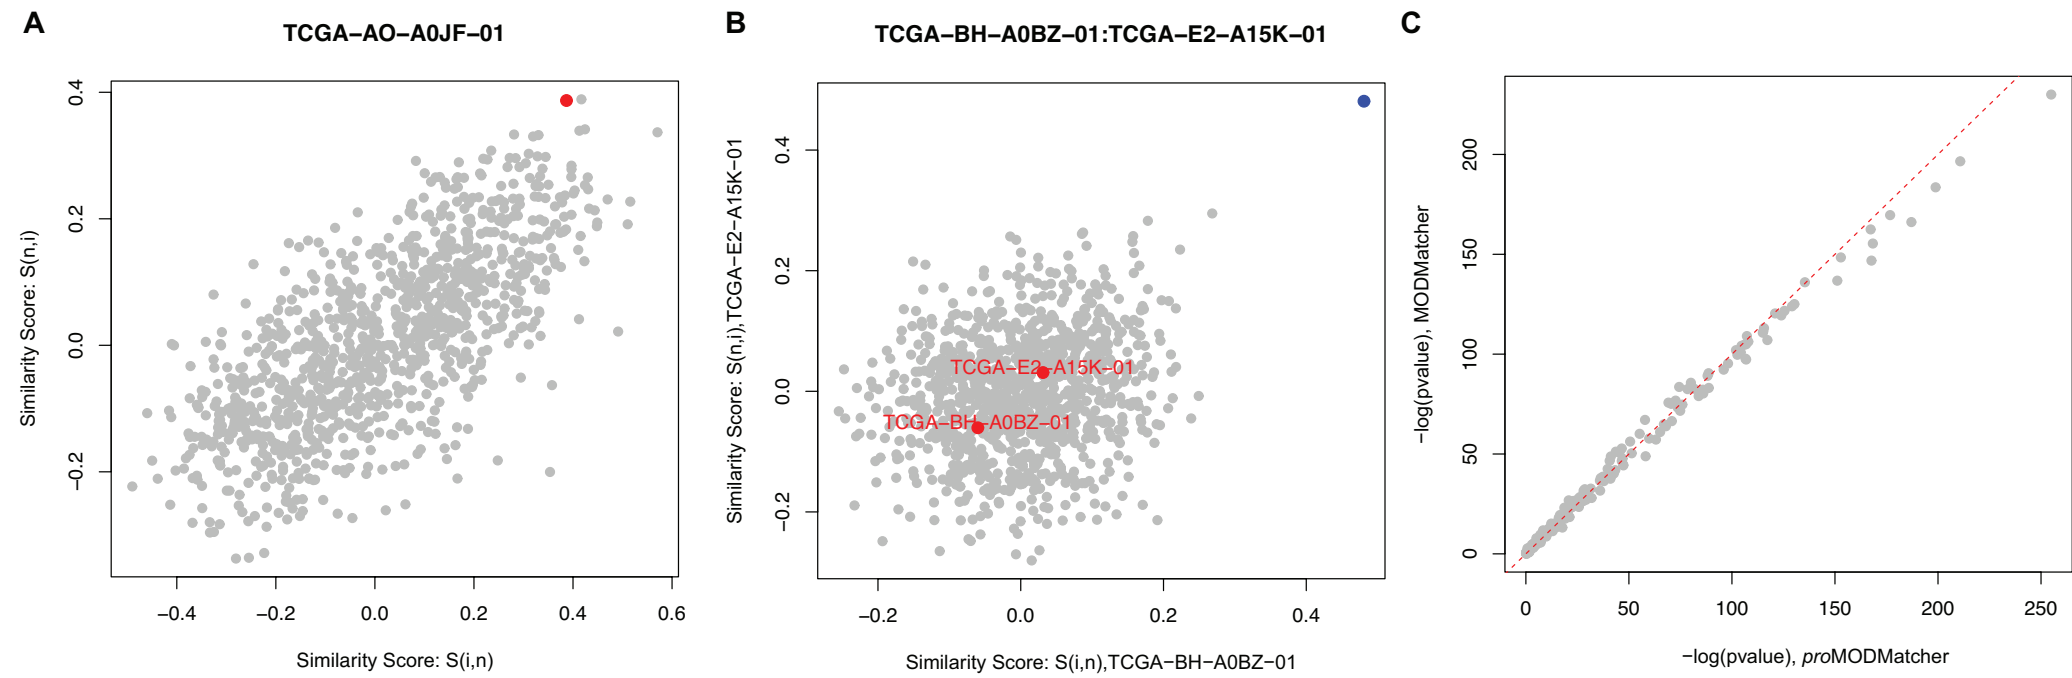

Figure 6

Click here to access/download;Figure;Figure6\_SimilarityScore\_01102019.eps

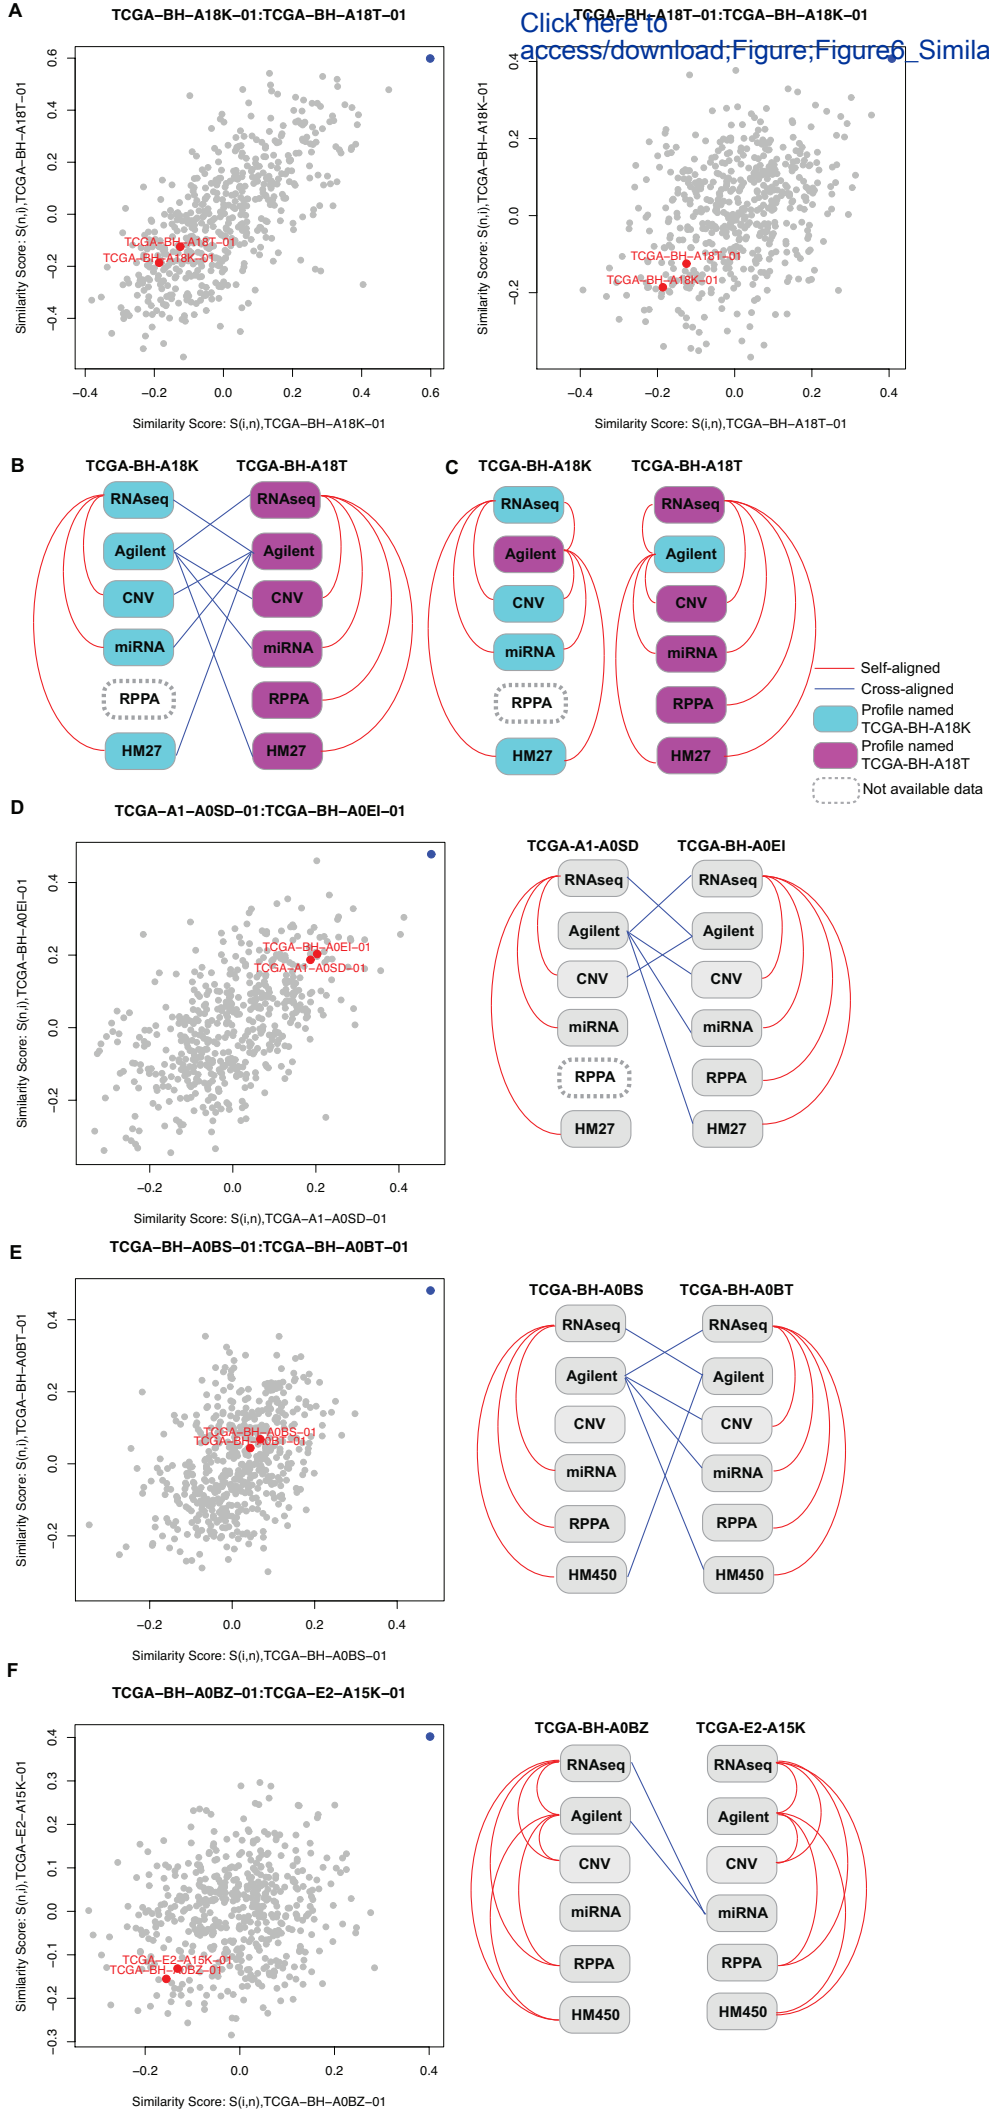

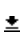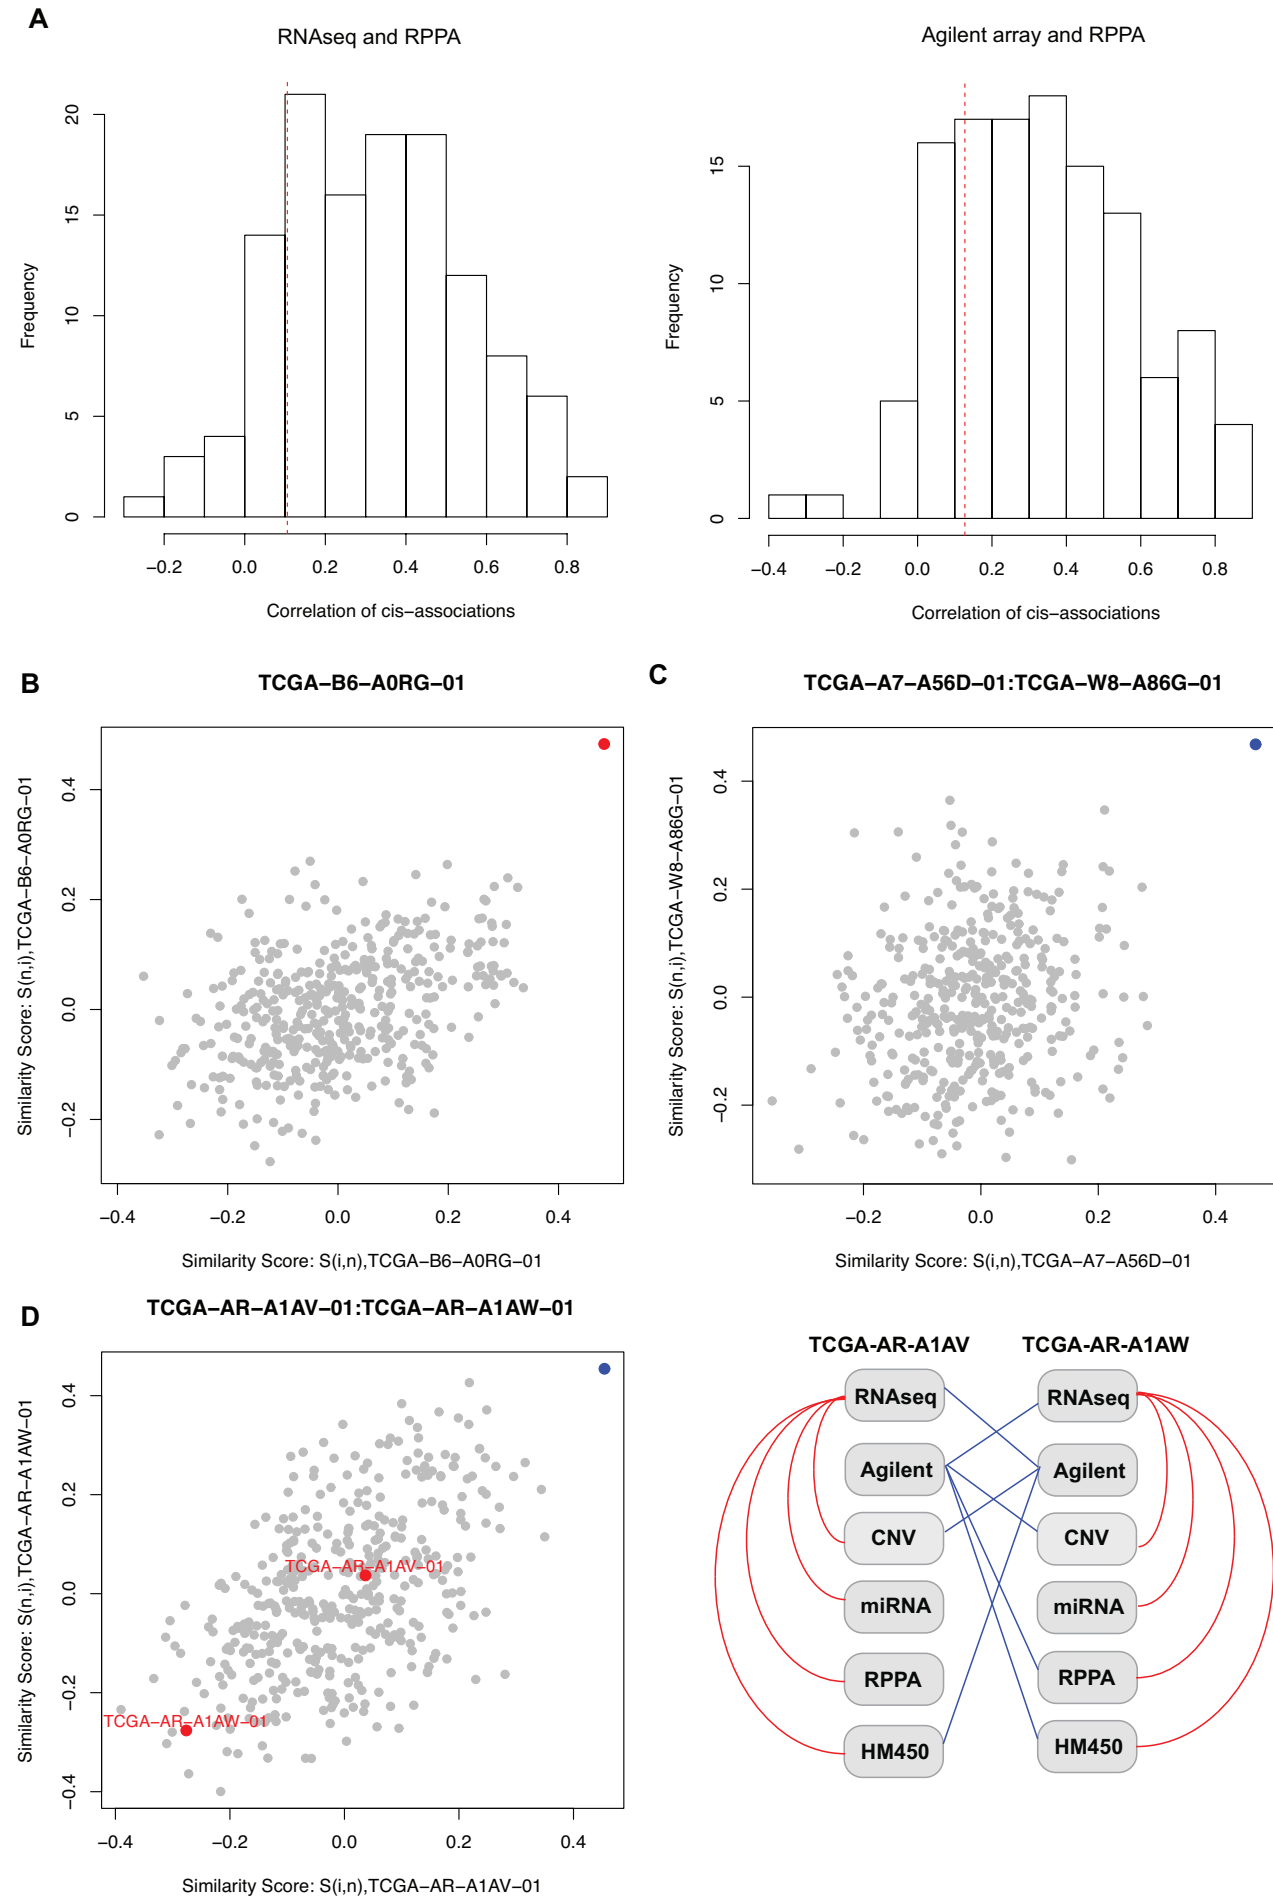

Figure 8

Click here to access/download;Figure;Figure8 CompareCorrelationAfterDisco

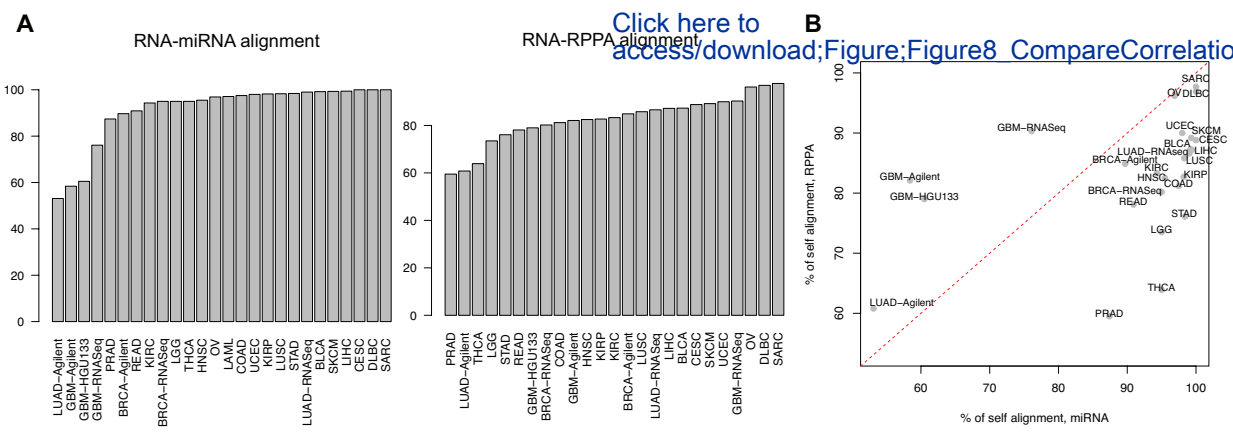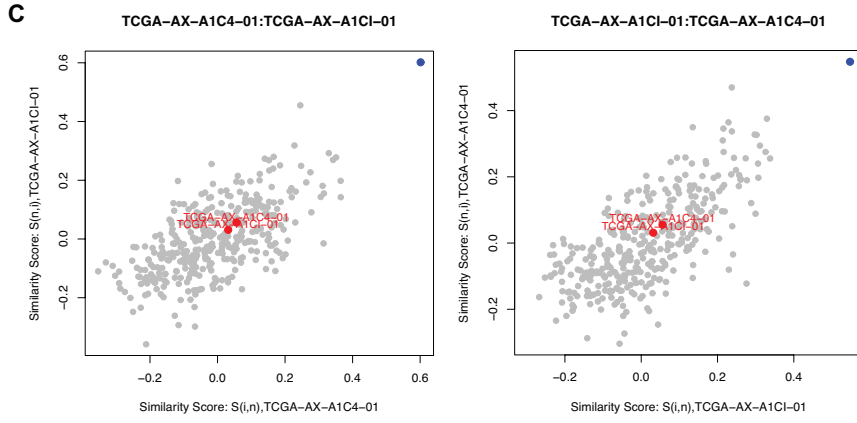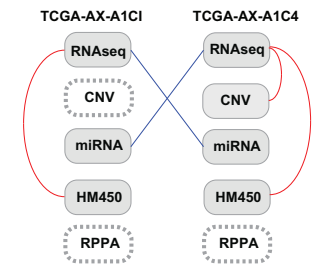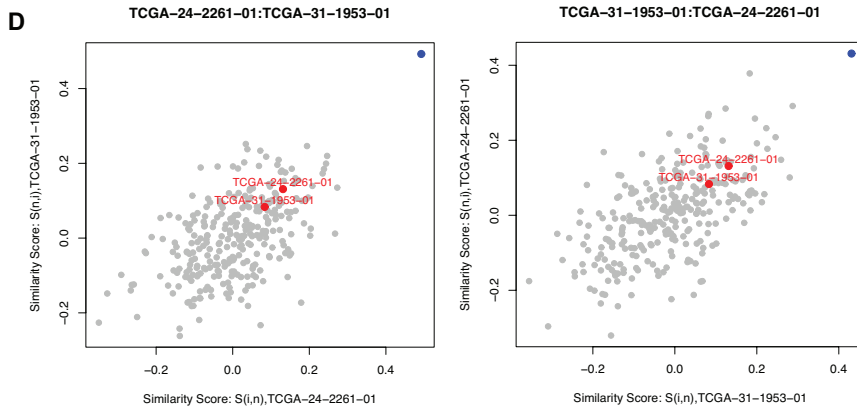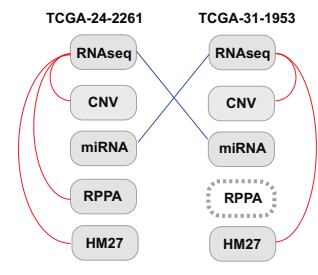

## A. NBL-US: Array and CNV

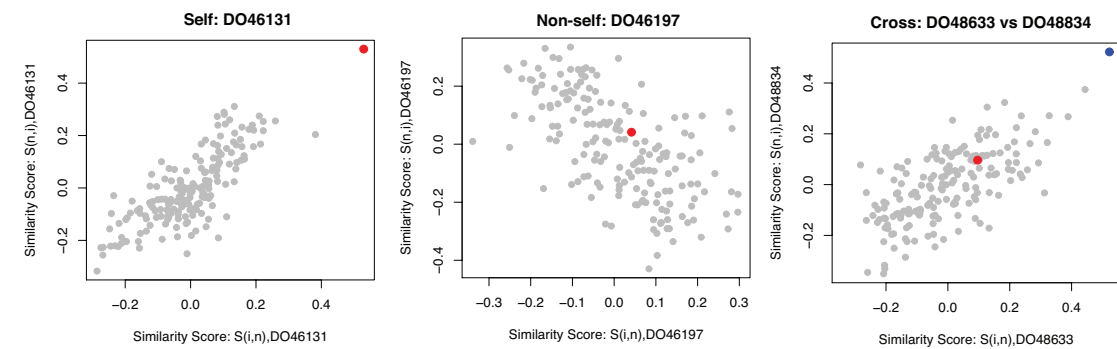

## B. CLLE-ES: Array and RNAseq

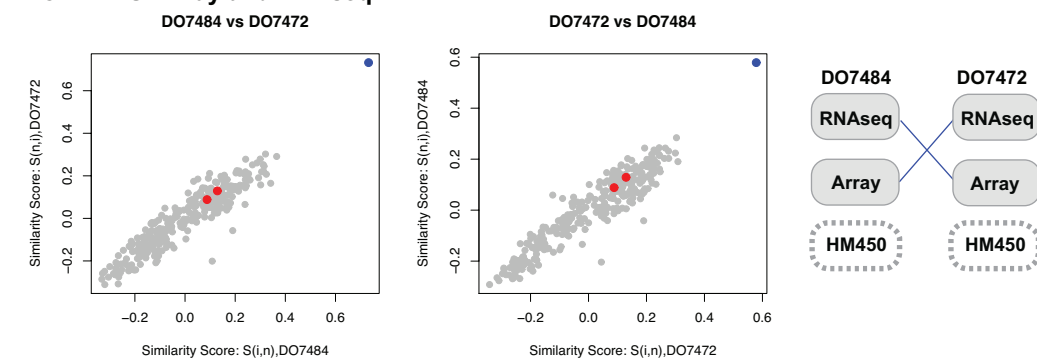

## C. PRAD-CA: RNAseq and methylation (HM450)

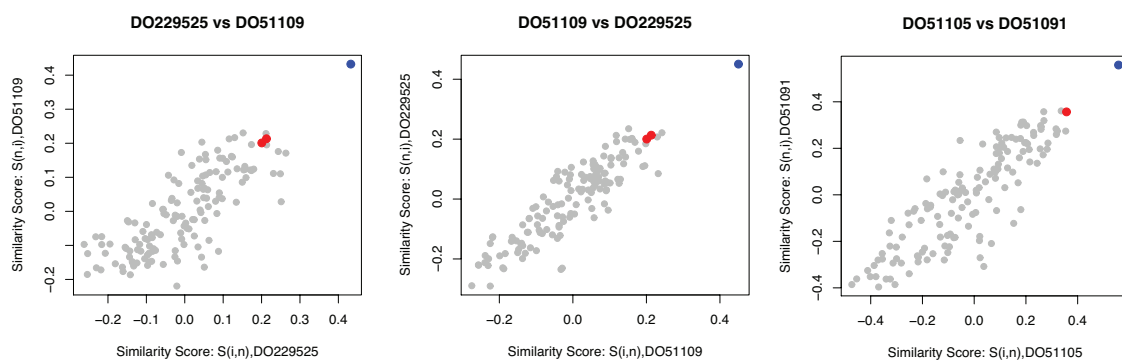

## D. PRAD-CA

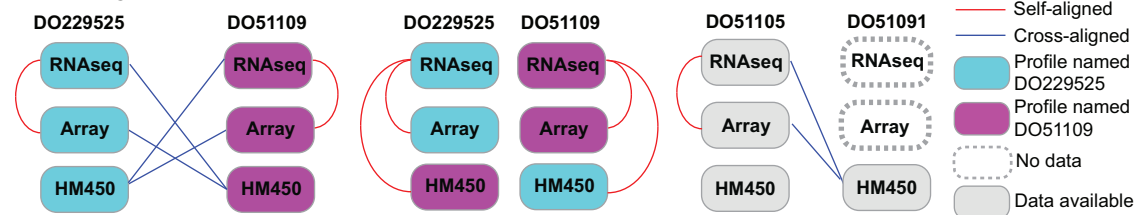

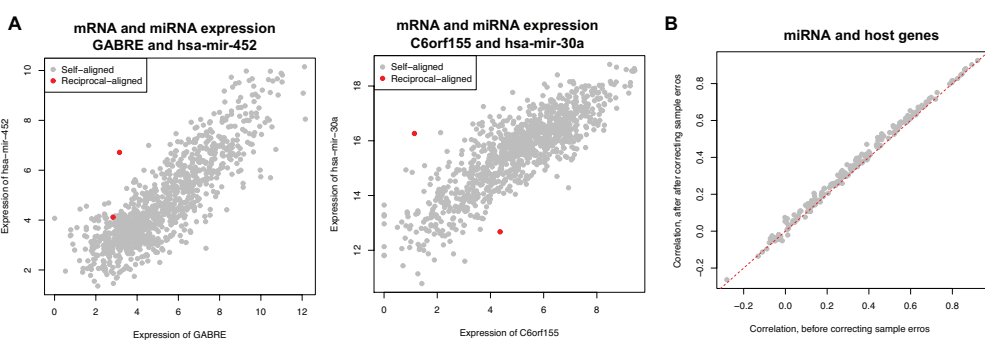



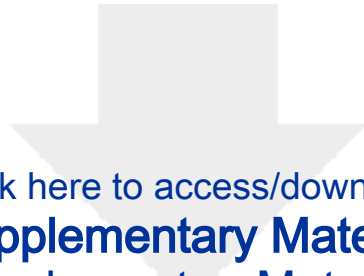

Click here to access/download

**Supplementary Material**

GigaScience\_SupplementaryMaterials\_Revision.pdf

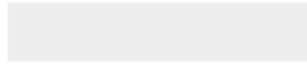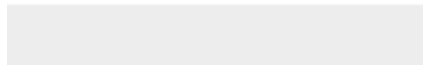

We have thoroughly addressed all reviewers' comments pertaining to our manuscript "*A probabilistic multi-omics data matching method for detecting sample errors in integrative analysis*". The reviewers' comments are very thoughtful and constructive, and have served to strengthen the manuscript significantly. We performed additional data analyses suggested by the reviewers, and revised the manuscript to address all comments as detailed below. The reviewer's comments are in black font type and our responses are given in blue. All page numbers and other such as references given are with respect to the revised manuscript unless otherwise stated.

#### Reviewer reports:

Reviewer #1: The author present proMODMatcher, a probabilistic multi-omics data matching method for detecting sample errors in integrative analysis. The study concerns the relevant problem of detecting sample errors in large datasets and the presented method offers an interesting solution. The method, which is an extension of MODMatcher, is designed to overcome the issue that the power of MODMatcher decreases when the number of "cis-associations" between two omics profiles is small. Overall, the paper is well organized. [We thank the reviewer for the encouraging comments.](#)

I recommend a revision because better justification is needed for the arguments based on existing data and the clarity of some results needs to be improved.

1) The generic concept of "biological cis-association" should be explained in more detail and supported with some examples, starting with the introduction. Indeed, this concept is central to the functioning of both MODMatcher and proMODMatcher, and it is also related to the main motivation for the development of proMODMatcher. Besides, what are the criteria for defining such cis-associations? To which (combinations of) omics types can such criteria be applied? [We appreciated the reviewer's comment. Following the reviewer suggestion, we added the following sentences at the Introduction in Page 4:](#)

["The main idea is first to identify "biological \*cis\*-associations" between two types of omics data, and then to use these "biological \*cis\*-associations" as intrinsic barcodes to match different types of omics data. The types of "biological \*cis\*-associations" are different when different pairs of omics data are mapped, but they all reflect general biological regulations. For example, when mapping genotype and gene expression data, the method is based on \*cis\*-genetic regulation of expression traits \(or expression quantitative trait loci—\*cis\*-eQTLs\), where a genetic polymorphism at a gene's promotor or regulatory region affects transcription factors or co-factors binding, which in turn affects the abundance of the gene's transcript \[11\]. Similarly, when mapping methylation and gene expression data, the method leverages on \*cis\*-methylation regulation of expression traits \(or \*cis\*-methylys\), where high DNA methylation level of CpGs at a gene's promotor or regulatory region hinders transcription factors or co-factors binding, which in turn represses the gene's transcription \[12\]. More on "biological \*cis\*-associations" are detailed in the Methods section."](#)

Also, we added the following section at the Methods section in Page 21:

#### **"Biological cis-associations"**

["Biological cis-associations" reflect different biological regulations when different pairs of omics data are mapped. \(1\) cis-eQTLs for mapping genotype and gene expression data: a genetic polymorphism at a gene's promotor or regulatory region affects transcription factors or co-factors binding, which in turn affects the abundance of the gene's transcripts \[11\]. If the genetic polymorphism occurs within 1M bases from the gene's transcription start site and the](#)

association is significant at the false discovery rate (FDR)  $<0.05$ , the association is called as a cis-eQTL. (2) cis-methylations for mapping DNA methylation and gene expression data: increased DNA methylation at CpGs sites near a gene promoter region is associated with gene repression [12]. A methylation probe is assigned to the transcript whose start site is closest to the genomic location of the methylation probe when it is potentially mapped to multiple transcripts. If a DNA methylation probe locates within 1M bases from the gene's start site and the association between the methylation level and the gene's expression level is significant at FDR  $<0.05$ , the methylation probe is a cis-methylation probe. (3) cis-CNVs for mapping DNA copy number variations (CNVs) and gene expression profiles: amplified or deleted genomic regions can regulate the expression levels of genes within that genomic region [16]. If a gene's expression is associated with its CNV at FDR  $<0.05$ , the CNV is a cis-CNV. (4) cis-miRNA-gene pairs for mapping miRNA and gene expression profiles: a small portion of miRNAs are embedded in gene regions (i.e. host genes) and frequently co-transcribed with host genes [14, 15]. If the expression levels of a miRNA and its host gene are associated at FDR  $<0.05$ , the pair is a cis-miRNA-gene pair. (5) cis-mRNA-protein pairs for mapping protein and gene expression profiles: the abundance of a protein depends on the corresponding mRNA transcript level and other factors [17]. If their association is significant at FDR  $<0.05$ , the pair is a cis-mRNA-protein pair."

2) Related to point 1: are there limitations in terms of missing data or sparse datasets (e.g. mutation profiles)?

For genotype data, we used common variants instead of rare variants to increase information content (Shannon Entropy) per locus (or gene). In the eQTL analyses, the loci of minor allele frequency (MAF) $>0.05$  were include.

Regarding missing data, we pre-processed data profiles to filter out genes or probes with more than 25% of missing values. Regarding sparse data, the input data can be any sparse datasets such as mutation profiles. We added the following sentences in the Discussion section in Page 19:

"The proMODMatcher depends on a set of biological cis-associations and the information content (Shannon entropy) of each cis-association depends on the randomness of each locus or gene. Thus, in our analyses, we excluded biological cis-associations that are driven by extreme values (rare events). For example, in eQTL analyses, we only included loci of minor allele frequency (MAF) $>0.05$ . Missing values commonly occur in high throughput omics data. In our analyses, we don't explicitly impute missing values. Instead, we filtered out probes or genes of more than 25% missing value in the data pre-processing step."

3) In general, some aspects related to the comparison between proMODMatcher and MODmatcher should be clarified.

3.1) The difference between the performances of the two methods in simulated datasets is very narrow (mostly of  $10^{-3}$  or  $10^{-4}$ , like 0.9994 vs 1). In this view, the improvement of proMODMatcher in comparison to MODMatcher appears to be very marginal. Additionally, the specificity for some simulations at low nCIS (e.g. red dots nCIS=75) is, in opposition to expectations, higher in MODMatcher than proMODMatcher; these results raise concerns on the expected superiority of proMODMatcher vs MODMatcher at low nCIS, which does not appear as clearly as in Figure 2.

Methods performance depends on both sensitivity and specificity. The proMODMatcher method performed better than MODMatcher did in term of F scores (Figure 3B). The top goal of MODMatcher and proMODMatcher is to detect "errors" of omics profiles without introducing any

errors. Therefore, we emphasized the improvement of *proMODMatcher* in terms of specificity over sensitivity. Figure 3D shows that *proMODMatcher* achieved better specificity than *MODMatcher* across all conditions that we tested, and the better F scores (Figure 3B) were largely due to better specificity. We reworded the paragraph clarify this point of view in the Analyses section in Page 9:

“The top goal of *MODMatcher* and *proMODMatcher* is to identify sample labeling errors without introducing any errors. Thus, we optimized the specificity of *proMODMatcher* over its sensitivity. In terms of sensitivity and specificity’s contribution to F scores, *proMODMatcher* achieved a similar sensitivity as *MODMatcher* (Figure 3C) but better specificities in all cases (Figure 3D).”

3.2) In real datasets (TCGA), the gain of using *proMODMatcher* instead of *MODMatcher* is not clearly quantified. To better motivate the use of *proMODMatcher* in spite of *MODMatcher*, the authors should better illustrate the quantitative differences between the results obtained by the two methods. For instance, how many conflicting predictions? Shared results?

Following the reviewer’s comments, we quantified the comparison of results for *proMODMatcher* and *MODMatcher* in real data sets in the Analyses section and added one additional column in Tables 1 and 2, indicating whether cross-aligned pairs were detected by *MODMatcher*.

Additionally, we added similarity score plots for the cross-aligned pairs that were detected only by *MODMatcher* as Supplementary Figure S2 and Supplementary Figure S4 to emphasize specificity of *proMODMatcher*. Also, we added the following sentences in the *Aligning gene expression profiles by RNAseq and miRNAseq data* of Analyses section in Page 12:

“On the other hand, the cross-aligned pairs detected only by *MODMatcher* showed relatively marginal similarity scores even though the similarity scores of cross-aligned pairs were the highest (Supplementary Figure S2).”

Also, we added the following sentences in the *Aligning gene expression profiles by Agilent microarray and miRNAseq data* of Analyses section in Page 13:

“8 out of 9 pairs were also detected by *MODMatcher* (Table 1). *MODMatcher* detected additional cross-aligned pairs including several questionable cross-aligned pairs (i.e. TCGA-E2-A153-01 and TCGA-E9-A1NG-01, TCGA-AR-A1AL-01 and TCGA-AR-A1AN-01 in Supplementary Figure S4).”

Additionally, for the alignment between RPPA and Array profiles, we identified the cross-aligned pair of the mRNA Agilent microarray profile TCGA-AR-A1AV-01 and the RPPA profile of TCGA-AR-A1AW-01 data, consistent with labeling errors in the mRNA Agilent array data. However, this pair was not identified by *MODMatcher* (Table 2), indicating its limited sensitivity. We added the following sentences in the Application to TCGA breast cancer dataset: mRNA and RPPA profiles of Analyses section in Page 15:

“However, this pair was not identified by *MODMatcher* (**Table 2**).”

#### Other minor comments

It is important that potential users are aware of the computational cost required for the analyses. Following the reviewer’s comment, we added our computational cost and CPU time at the end of the Discussion section in Page 19:

“The computational cost of applying *proMODMatcher* is small. For example, mapping mRNA and miRNA expression profiles for 408 samples took 802 seconds of CPU time with maximum memory usage of 503 MB on a machine with CPU processor 3.50 GHz. ”

117 "based on"?

We thank the reviewer for pointing out these errors. Yes, it should be “based on”

355 Only here the author mention Pearson correlation. Did you mean Spearman?

Yes, it should be “Spearman correlation”.

382 RT(...) and T(...)

Yes , they should RT(..).

Fig. 1 caption: "calucalte"

We corrected the mis-spelling in the Fig1D's caption.

Fig. 4d sothers

We corrected the mis-spelling.

Reviewer #2: Major comments:

1. It would be highly appreciated if the github or other open source (e.g. CRAN R-package) version of the tool can be provided with a user-friendly manual, this will help to make this tool available to a large enough community.

Following the reviewer's comments, we uploaded our package to github (<https://github.com/integrativenetworkbiology/proMODMatcher>). It will become public once the paper is published.

2. It is not very clear how the proteomics/ CNV/ methylation are mapped to gene expression data. From the result part, I can only see RNAseq/microRNA/RPPA/microarray datasets. I didn't see the results of other multi-omics layers as introduced in the data description section of the results part.

As the reviewer suggested, we added the following sentences in the Introduction section in Page 4:

“The main idea is first to identify “biological *cis*-associations” between two types of omics data, and then to use these “biological *cis*-associations” as intrinsic barcodes to match different types of omics data. The types of “biological *cis*-associations” are different when different pairs of omics data are mapped, but they all reflect general biological regulations. For example, when mapping genotype and gene expression data, the method is based on *cis*-genetic regulation of expression traits (or expression quantitative trait loci—*cis*-eQTLs), where a genetic polymorphism at a gene's promotor or regulatory region affects transcription factors or co-factors binding, which in turn affects the abundance of the gene's transcript [11]. Similarly, when mapping methylation and gene expression data, the method leverages on *cis*-methylation regulation of expression traits (or *cis*-methylys), where high DNA methylation level of CpGs at a gene's promotor or regulatory region hinders transcription factors or co-factors binding, which in turn represses the gene's transcription [12]. More on “biological *cis*-associations” are detailed in the Methods section.”

Also, we added the following section at the Methods section in Page 21:

#### **Biological cis-associations**

“Biological *cis*-associations” reflect different biological regulations when different pairs of omics data are mapped. (1) *cis*-eQTLs for mapping genotype and gene expression data: a genetic polymorphism at a gene's promotor or regulatory region affects transcription factors or co-factors binding, which in turn affects the abundance of the gene's transcripts [11]. If the genetic

polymorphism occurs within 1M bases from the gene's transcription start site and the association is significant at the false discovery rate (FDR) <0.05, the association is called as a cis-eQTL. (2) cis-methylations for mapping DNA methylation and gene expression data: increased DNA methylation at CpGs sites near a gene promoter region is associated with gene repression [12]. A methylation probe is assigned to the transcript whose start site is closest to the genomic location of the methylation probe when it is potentially mapped to multiple transcripts. If a DNA methylation probe locates within 1M bases from the gene's start site and the association between the methylation level and the gene's expression level is significant at FDR <0.05, the methylation probe is a cis-methylation probe. (3) cis-CNVs for mapping DNA copy number variations (CNVs) and gene expression profiles: amplified or deleted genomic regions can regulate the expression levels of genes within that genomic region [16]. If a gene's expression is associated with its CNV at FDR <0.05, the CNV is a cis-CNV. (4) cis-miRNA-gene pairs for mapping miRNA and gene expression profiles: a small portion of miRNAs are embedded in gene regions (i.e. host genes) and frequently co-transcribed with host genes [14, 15]. If the expression levels of a miRNA and its host gene are associated at FDR <0.05, the pair is a cis-miRNA-gene pair. (5) cis-mRNA-protein pairs for mapping protein and gene expression profiles: the abundance of a protein depends on the corresponding mRNA transcript level and other factors [17]. If their association is significant at FDR <0.05, the pair is a cis-mRNA-protein pair."

3. Mapping database: I can just see a mapper file in the package which is between microRNA and gene expression. I don't know the resource of the mapping file, which should be described in the methods section. 4. This resource may also be updated regularly. The mapping file should also include methylation/gene expression, protein/gene expression etc. Currently this tool is not as what it declares to be, a "multi-omics tool".

Our mapping information is based on human genome assembly GRCh37 or gene symbols. We uploaded the following mapper files:

Matching\_array\_MethylationHM27.txt: Mapping between gene symbol and HM450 probe ID

Matching\_array\_MethylationHM450.txt: Mapping between gene symbol and HM27 probe ID

Matching\_array\_miRNA.txt: Mapping between gene symbol and miRNA

Matching\_array\_protein.txt: Mapping between gene symbol and RPPA protein

TCGA datasets are mostly based on U.S. patients, I am wondering if you can look into ICGC datasets ([https://urldefense.proofpoint.com/v2/url?u=https-3A\\_dcc.icgc.org\\_projects&d=DwlGaQ&c=shNJtf5dKgNcPZ6Yh64b-A&r=RO09G907SbMLMqHyrCDZCw&m=HO91CP23G7b0TPBszNquttd47V51QT6Z7R7AQmyn-m8&s=e2XbBb6Lvod0C-R71wukksblJ3yAUM5CrjPmWJXutQ&e=](https://urldefense.proofpoint.com/v2/url?u=https-3A_dcc.icgc.org_projects&d=DwlGaQ&c=shNJtf5dKgNcPZ6Yh64b-A&r=RO09G907SbMLMqHyrCDZCw&m=HO91CP23G7b0TPBszNquttd47V51QT6Z7R7AQmyn-m8&s=e2XbBb6Lvod0C-R71wukksblJ3yAUM5CrjPmWJXutQ&e=)) to look into other multi-omics datasets and see if this tool still holds on the other datasets?

We thank the reviewer for the suggestion. We applied our procedure to ICGC datasets. Among ICGC datasets with more than one types of omics profiles (i.e. expression, DNA methylation, miRNA expression, and copy number variation profile) available, we selected 8 datasets based on the number of samples (i.e. more than 25). We added the section "ICGC datasets" in the Data Description section as follows:

#### **ICGC datasets**

"For the ICGC datasets, the pre-processed data were downloaded from ICGC data portal (<https://dcc.icgc.org/>). We selected datasets with more than one available types of omics data including mRNA expression profiles (i.e. RNAseq and Array), DNA methylation profiles based on Illumina HumanMethylation450 (HM450), miRNA expression profiles, and copy number somatic mutation profiles. Each of profiles was reformatted into a matrix with genes (or probes)

as rows and barcodes of samples as columns. The gene and miRNA expression profiles were log2 transformed and normalized by quantile normalization[13]. For copy number somatic mutation profiles, the segments were mapped to hg19 gene symbols. Some datasets contain very sparse segment information for copy number somatic mutation profiles such as CLLE-ES. We excluded these copy number profiles for further analysis. For methylation profiles, the probes were mapped to hg19 gene symbols.”

Among ICGC datasets, *proMODMatcher* identified data errors in some of datasets including CLLE-ES and PRAD-CA. To summarize the results, we added the Table 5 and Figure 9 and the section Application to ICGC datasets in the Analyses section in Page 17:

#### **“Application to ICGC datasets**

We applied *proMODMatcher* to 8 cancer datasets that were generated by institutes in the U.S., Spain, UK, Germany, Australia, Canada, and France. Each dataset contains more than one types of omics data including mRNA expression profiles (i.e. RNAseq and Array), DNA methylation profiles based on Illumina HumanMethylation450 (HM450), miRNA expression profiles, and copy number somatic mutation profiles. The ICGC datasets used and the associated alignment results were summarized in Table 5. In some of datasets such as PAEN-AU and PRAD-FR, all profiles were matched to other corresponding profiles of the same sample names (Table 5). On the other hand, several sample errors were identified in some datasets. For example, mapping between gene expression Array and CNV profiles in the NBL-US dataset resulted in 170 self-self aligned sample pairs, 10 non self-self aligned samples and 12 cross-mapped pairs of profiles (examples shown in Figure 9A). Mapping gene expression profiles by RNAseq and Array in the CLLE-ES dataset yielded five non self-self aligned samples and two cross-mapped pairs of samples. The two cross-mapped pairs of samples were likely due to a swap of either RNAseq profile or Array profile (Figure 9B). Similarly, *proMODMatcher* identified three cross-alignments between RNAseq and DNA methylation profiles in the PRAD-CA dataset, which were also involved in cross-mappings when mapping Array and DNA methylation profiles: two of them were likely due to a swap of DNA methylation (HM450) profiles of DO229525 and DO51109 (Figure 9CD), and one of them was likely due to sample labeling errors in DNA methylation array (HM450) (Figure 9CD). “

#### Minor comments:

There were several instances in the manuscript where there were minor grammatical errors. I'd recommend just having a native English speaker give it a careful read before publication. Also there are some misspelling errors (eg. Figure 4E Correlation) in this paper.

There seems to be a bar omitted in Figure 3A first plot with  $n_{Cis} = 75$ , # sample =1000.

We thank the reviewer for pointing out these errors. We corrected misspelling errors and added a bar corresponding  $n_{Cis}=75$  and # sample = 1000 in Figure 3A plot.
