# Supplementary material for: A probabilistic multi-omics data matching method for detecting sample errors in integrative analysis
Source: PubMed Central journal article supplement (PMC6615984; doi:10.1093/gigascience/giz080), 2019-07-09
Supplement: giz080_response_to_reviewer_comments_original_submission.pdf [file giz080_response_to_reviewer_comments_original_submission.pdf]

## Author's Response To Reviewer Comments

Close

We have thoroughly addressed all reviewers' comments pertaining to our manuscript "A probabilistic multi-omics data matching method for detecting sample errors in integrative analysis". Detailed responses are listed in the "Response to reviewers comments" letter.

Close
