# Supplementary material for: A probabilistic multi-omics data matching method for detecting sample errors in integrative analysis
Source: PubMed Central journal article supplement (PMC6615984; doi:10.1093/gigascience/giz080), 2019-07-09
Supplement: giz080_supplemental_file.pdf [file giz080_supplemental_file.pdf]

## **SUPPLEMENTARY MATERIALS**

### **A probabilistic multi-omics data matching method for detecting sample errors in integrative analysis**

Eunjee Lee<sup>1,2,3</sup>, Seungyeul Yoo<sup>1,2</sup>, Wenhui Wang<sup>1,2</sup>, Zhidong Tu<sup>1,2</sup> and Jun Zhu<sup>1,2,3,4, \*</sup>

<sup>1</sup>Department of Genetics and Genomic Sciences; <sup>2</sup>Icahn Institute of Genomics and Multiscale Biology, Icahn School of Medicine at Mount Sinai, New York, NY 10029;

<sup>3</sup>Sema4, a Mount Sinai venture, Stamford, CT, USA; <sup>4</sup>The Tisch Cancer Institute, Icahn School of Medicine at Mount Sinai, New York, NY 10029;

\*All corresponds should be addressed to Dr. Jun Zhu ([jun.zhu@mssm.edu](mailto:jun.zhu@mssm.edu))

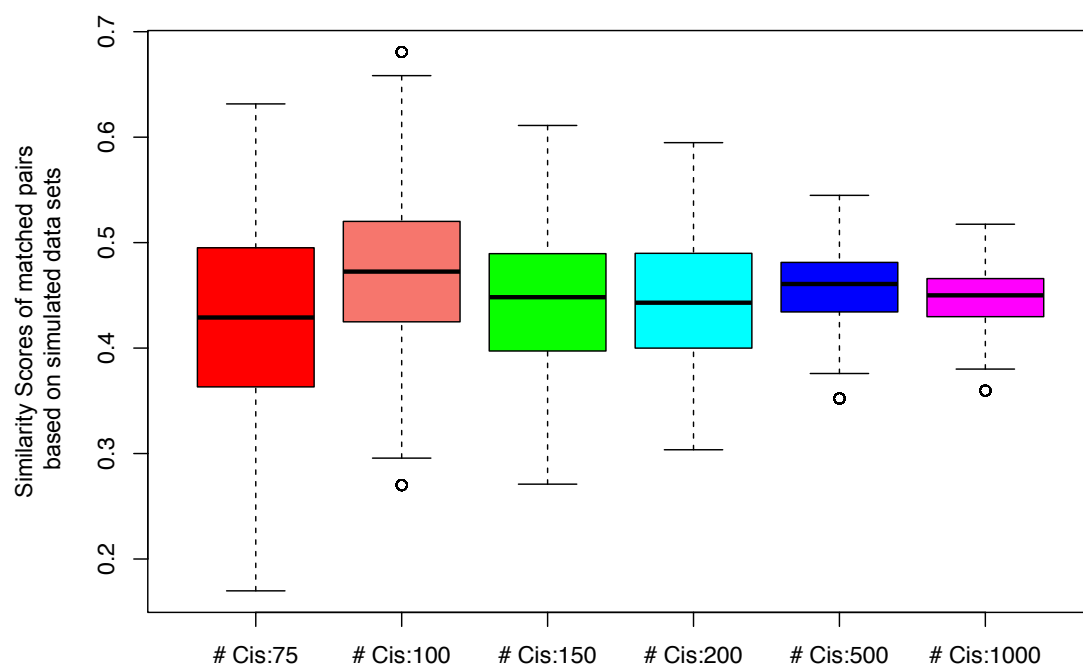

**Supplementary Figure S1. Similarity scores of matched pairs based on simulated data sets.**

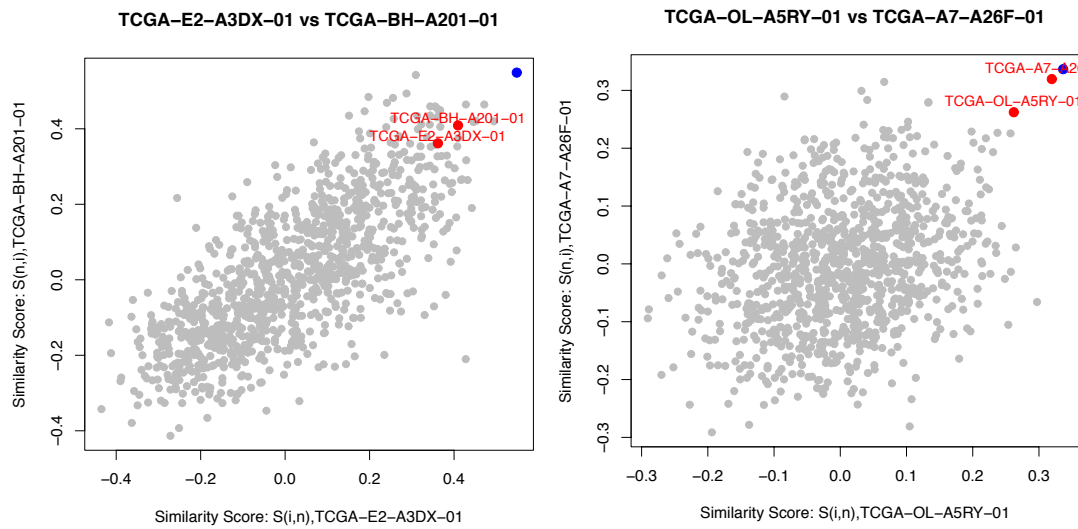

**Supplementary Figure S2. Similarity scores of cross-aligned pairs detected by only MODMatcher based on aligning RNASeq and miRNA profiles of BRCA data.**

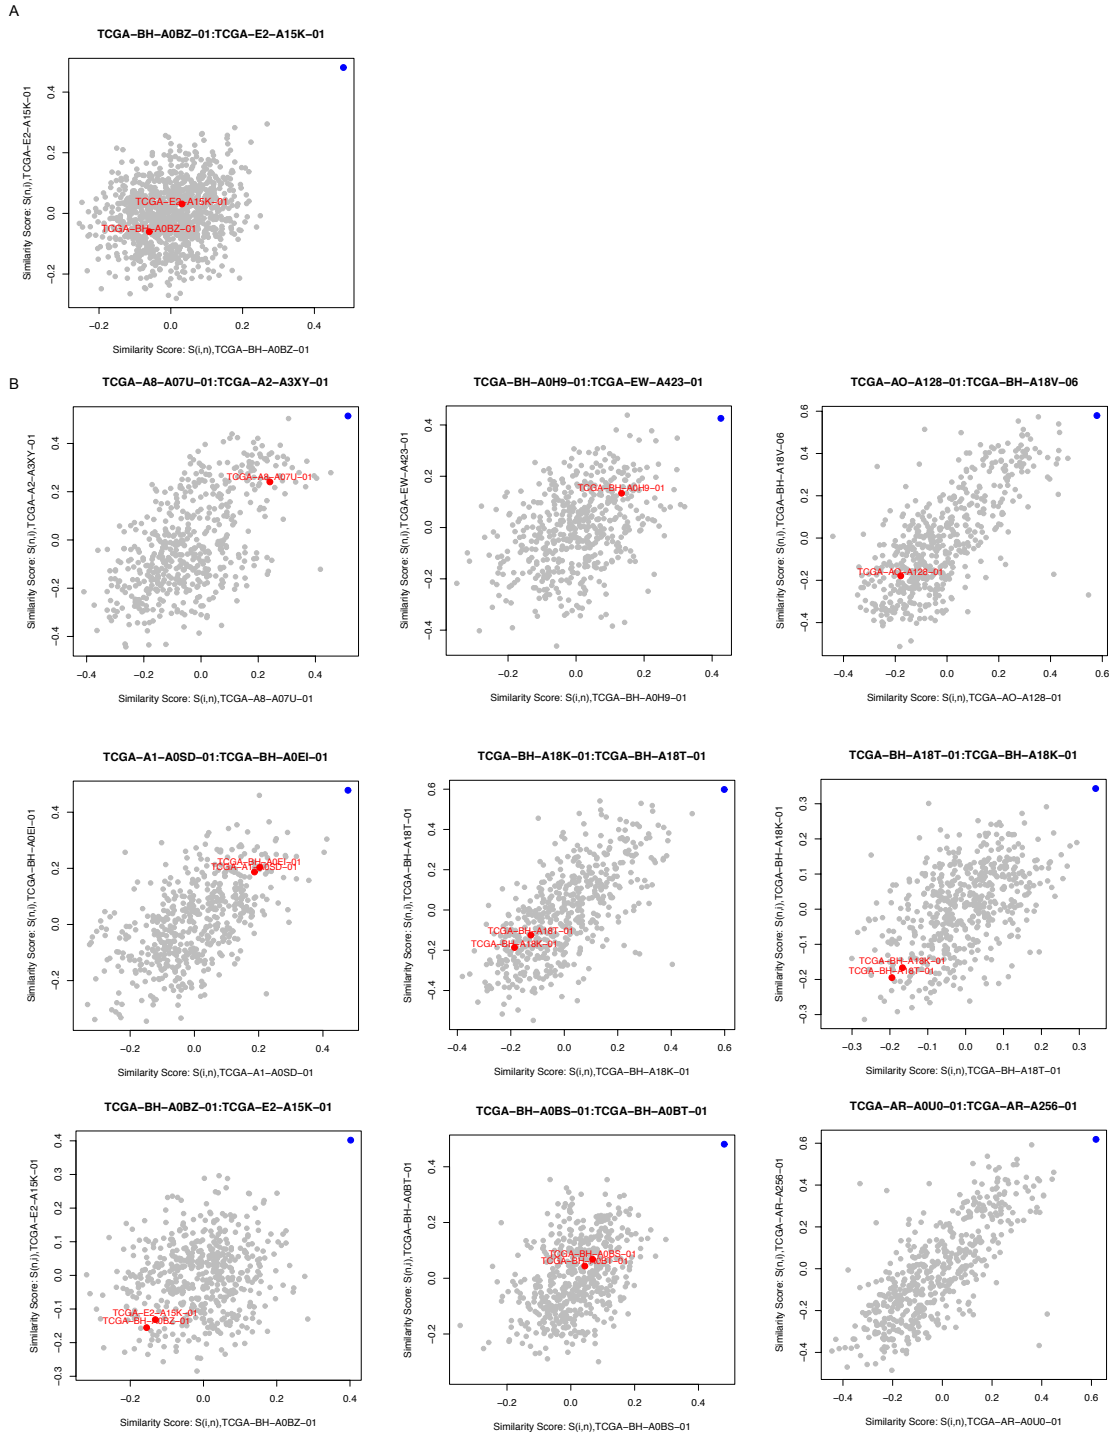

**Supplementary Figure S3. Similarity scores of cross-aligned pairs based on aligning RNA and miRNA profiles of BRCA data. (A) Alignment of RNAseq and miRNAseq profiles. (B) Alignment of Agilent array and miRNAseq profiles.**

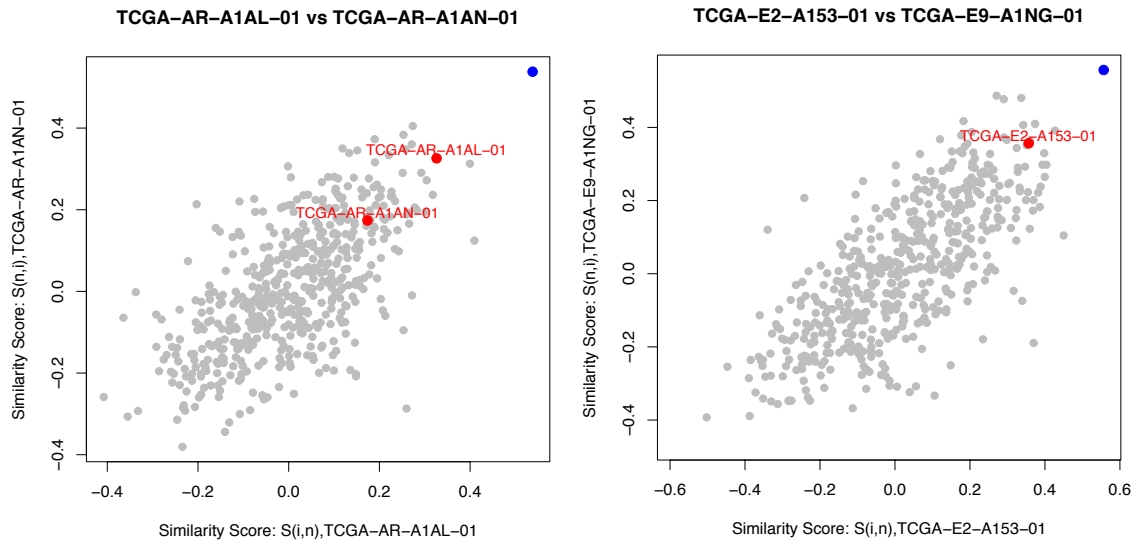

**Supplementary Figure S4. Similarity scores of cross-aligned pairs detected by only MODMatcher based on aligning Array and miRNA profiles of BRCA data.**

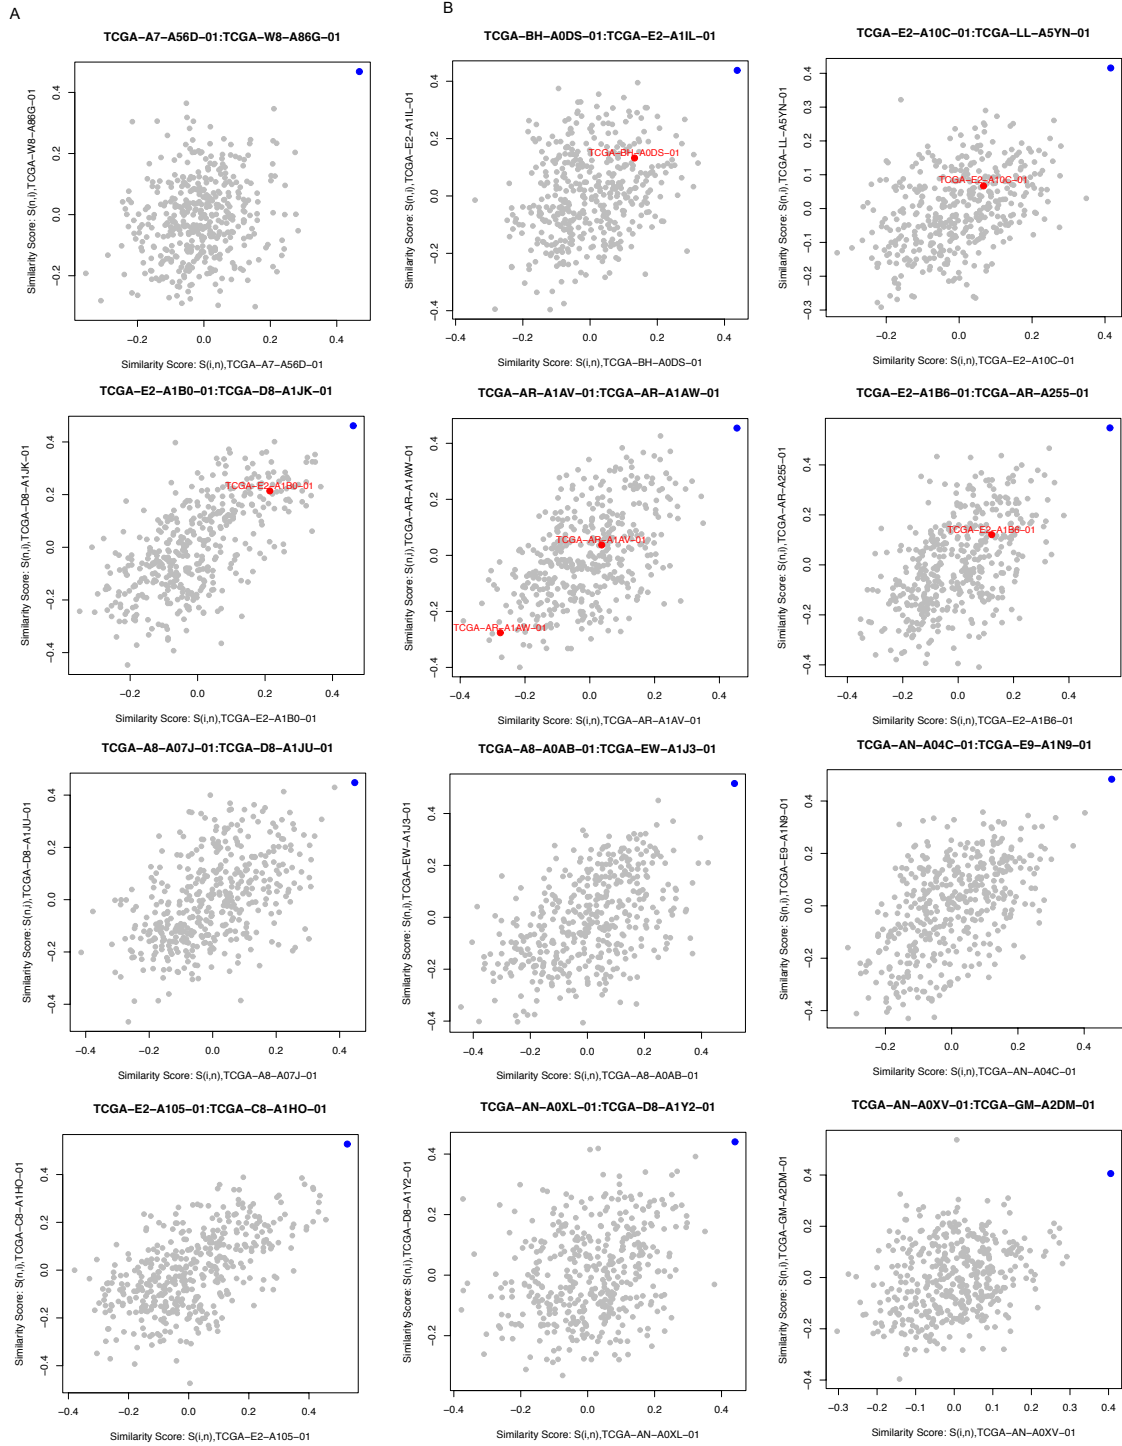

**Supplementary Figure S5. Similarity scores of cross-aligned pairs based on aligning RNA and RPPA profiles of BRCA data. (A) Aligning of RNAseq and RPPA profiles. (B) Aligning of Agilent array and RPPA profiles.**

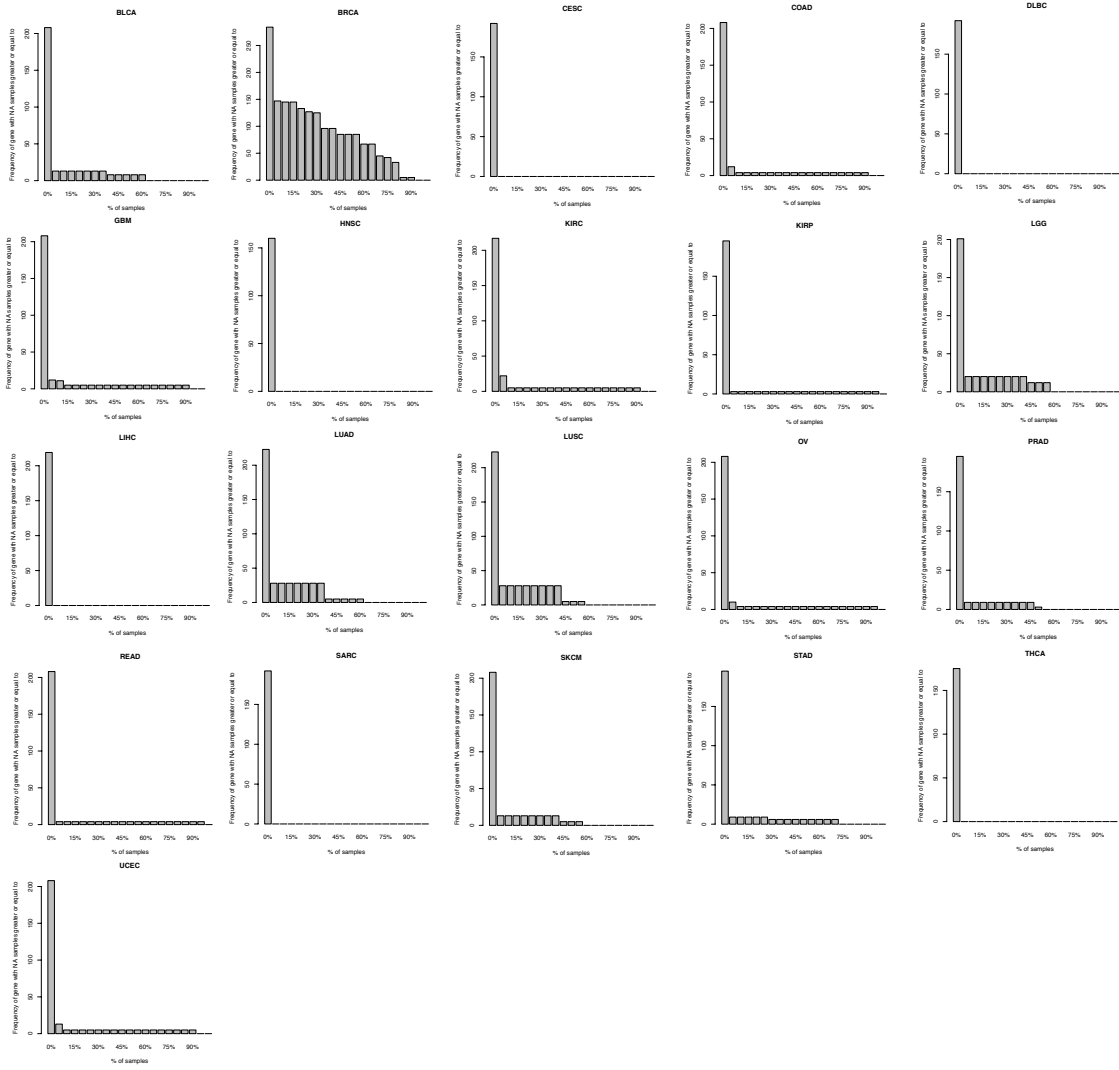

**Supplementary Figure S6. The frequency of genes of which the number of samples with non-assigned values are greater than each % of samples.**

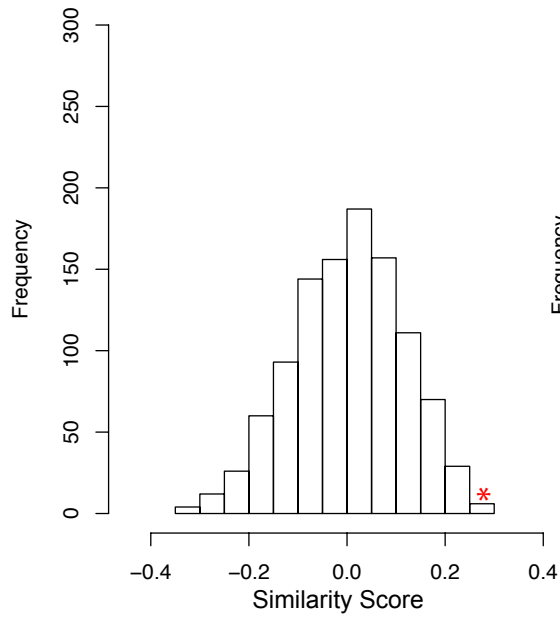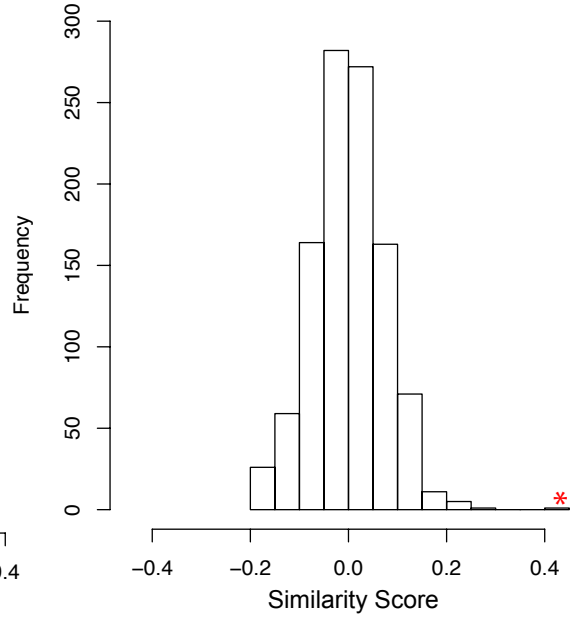

**Supplementary Figure S7. Examples of distribution of similarity scores.** The red star indicates the values of the highest similarity score.



**Supplementary Table S1.** Sample alignment results by MODMatcher for mRNA (Array and RNAseq) -miRNAseq profiles based on BRCA data

| Method     | Data types | Data types | # Common samples | # cis pair | # of self-aligned | # of cross-aligned | Cross-aligned pairs | Cross-aligned pairs |
|------------|------------|------------|------------------|------------|-------------------|--------------------|---------------------|---------------------|
|            | Type1      | Type 2     | Type 1           |            |                   |                    | Type 1              | Type 2              |
| MODMatcher | RNAseq     | miRNAseq   | 1041             | 178/215    | 898 (86.2%)       | 5 (0.4%)           | TCGA-PE-A5DC        | TCGA-BH-A0B1        |
|            |            |            |                  |            |                   |                    | TCGA-OL-A5RY        | TCGA-A7-A26F        |
|            |            |            |                  |            |                   |                    | TCGA-E2-A3DX        | TCGA-BH-A201        |
|            |            |            |                  |            |                   |                    | TCGA-BH-A0BZ        | TCGA-E2-A15K        |
|            |            |            |                  |            |                   |                    | TCGA-GM-A2DA        | TCGA-E2-A14V        |
| MODMatcher | Agilent    | miRNAseq   | 519              | 137/178    | 452 (87.0%)       | 20 (3.8%)          | TCGA-A8-A07U        | TCGA-A2-A3XY        |
|            |            |            |                  |            |                   |                    | TCGA-AN-A0FN        | TCGA-D8-A1JH        |
|            |            |            |                  |            |                   |                    | TCGA-AO-A0JF        | TCGA-BH-A0DV        |
|            |            |            |                  |            |                   |                    | TCGA-A2-A0T6        | TCGA-D8-A73X        |
|            |            |            |                  |            |                   |                    | TCGA-E2-A107        | TCGA-A2-A25B        |
|            |            |            |                  |            |                   |                    | TCGA-AO-A128        | TCGA-BH-A18V        |
|            |            |            |                  |            |                   |                    | TCGA-B6-A0X7        | TCGA-AO-A128        |
|            |            |            |                  |            |                   |                    | TCGA-AN-A0XV        | TCGA-E9-A22B        |
|            |            |            |                  |            |                   |                    | TCGA-A1-A0SD        | TCGA-BH-A0EI        |
|            |            |            |                  |            |                   |                    | TCGA-BH-A18K        | TCGA-BH-A18T        |
|            |            |            |                  |            |                   |                    | TCGA-BH-A18T        | TCGA-BH-A18K        |
|            |            |            |                  |            |                   |                    | TCGA-E2-A153        | TCGA-E9-A1NG        |
|            |            |            |                  |            |                   |                    | TCGA-BH-A0BZ        | TCGA-E2-A15K        |
|            |            |            |                  |            |                   |                    | TCGA-BH-A0AU        | TCGA-A8-A0A7        |
|            |            |            |                  |            |                   |                    | TCGA-AR-A1AL        | TCGA-AR-A1AN        |
|            |            |            |                  |            |                   |                    | TCGA-BH-A0BS        | TCGA-BH-A0BT        |
|            |            |            |                  |            |                   |                    | TCGA-E2-A1B5        | TCGA-E2-A1LG        |
|            |            |            |                  |            |                   |                    | TCGA-A2-A0YJ        | TCGA-AR-A251        |
|            |            |            |                  |            |                   |                    | TCGA-AR-A0TU        | TCGA-OL-A66I        |
|            |            |            |                  |            |                   |                    | TCGA-AR-A0U0        | TCGA-AR-A256        |

**Supplementary Table S2.** Sample alignment results by MODMatcher for mRNA (Array and RNAseq) -RPPA profiles based on BRCA data

| Method          | Data types      | Data types | # Common samples | # cis pair | # of self-aligned | # of cross-aligned | Cross-aligned pairs | Cross-aligned pairs |
|-----------------|-----------------|------------|------------------|------------|-------------------|--------------------|---------------------|---------------------|
| MODMatcher      | RNAseq          | RPPA       | 856              | 103/151    | 606 (70.7%)       | 26 (3.0%)          | TCGA-AO-A12E-01     | TCGA-EW-A1IX-01     |
|                 |                 |            |                  |            |                   |                    | TCGA-AR-A24O-01     | TCGA-C8-A26W-01     |
|                 |                 |            |                  |            |                   |                    | TCGA-A2-A0CQ-01     | TCGA-D8-A73U-01     |
|                 |                 |            |                  |            |                   |                    | TCGA-EW-A6SC-01     | TCGA-A8-A09K-01     |
|                 |                 |            |                  |            |                   |                    | TCGA-GM-A2DK-01     | TCGA-A8-A06N-01     |
|                 |                 |            |                  |            |                   |                    | TCGA-E2-A1IU-01     | TCGA-BH-A0HX-01     |
|                 |                 |            |                  |            |                   |                    | TCGA-A2-A04Y-01     | TCGA-EW-A1PA-01     |
|                 |                 |            |                  |            |                   |                    | TCGA-GM-A3XG-01     | TCGA-BH-A0HN-01     |
|                 |                 |            |                  |            |                   |                    | TCGA-GM-A5PV-01     | TCGA-AO-A0JC-01     |
|                 |                 |            |                  |            |                   |                    | TCGA-D8-A73W-01     | TCGA-E9-A1R3-01     |
|                 |                 |            |                  |            |                   |                    | TCGA-AC-A5XS-01     | TCGA-C8-A274-01     |
|                 |                 |            |                  |            |                   |                    | TCGA-A2-A0YD-01     | TCGA-A7-A26E-01     |
|                 |                 |            |                  |            |                   |                    | TCGA-BH-A0EA-01     | TCGA-AR-A24O-01     |
|                 |                 |            |                  |            |                   |                    | TCGA-A2-A04Q-01     | TCGA-AO-A128-01     |
|                 |                 |            |                  |            |                   |                    | TCGA-LD-A7W6-01     | TCGA-E2-A15M-01     |
|                 |                 |            |                  |            |                   |                    | TCGA-A2-A04X-01     | TCGA-3C-AALI-01     |
|                 |                 |            |                  |            |                   |                    | TCGA-AC-A2FK-01     | TCGA-AR-A2LJ-01     |
|                 |                 |            |                  |            |                   |                    | TCGA-AC-A23H-01     | TCGA-C8-A8HQ-01     |
|                 |                 |            |                  |            |                   |                    | TCGA-A7-A56D-01     | TCGA-W8-A86G-01     |
|                 |                 |            |                  |            |                   |                    | TCGA-AC-A3EH-01     | TCGA-GM-A5PX-01     |
| TCGA-E2-A570-01 | TCGA-GM-A3XN-01 |            |                  |            |                   |                    |                     |                     |
| TCGA-BH-A0HB-01 | TCGA-LD-A7W5-01 |            |                  |            |                   |                    |                     |                     |
| TCGA-BH-A0GZ-01 | TCGA-E2-A15F-01 |            |                  |            |                   |                    |                     |                     |
| TCGA-EW-A1IY-01 | TCGA-A2-A25A-01 |            |                  |            |                   |                    |                     |                     |
| TCGA-A8-A07G-01 | TCGA-C8-A1HE-01 |            |                  |            |                   |                    |                     |                     |
| TCGA-OK-A5Q2-01 | TCGA-BH-A1EX-01 |            |                  |            |                   |                    |                     |                     |
| MODMatcher      | Agilent         | RPPA       | 424              | 97/145     | 347 (81.8%)       | 32 (7.5%)          | TCGA-A8-A084-01     | TCGA-PE-A5DD-01     |
|                 |                 |            |                  |            |                   |                    | TCGA-BH-A0BA-01     | TCGA-A7-A26H-01     |
|                 |                 |            |                  |            |                   |                    | TCGA-BH-A0DS-01     | TCGA-E2-A1IL-01     |
|                 |                 |            |                  |            |                   |                    | TCGA-BH-A0DP-01     | TCGA-AR-A24P-01     |
|                 |                 |            |                  |            |                   |                    | TCGA-BH-A0HX-01     | TCGA-EW-A1OY-01     |
|                 |                 |            |                  |            |                   |                    | TCGA-BH-A0RX-01     | TCGA-E2-A1LL-01     |
| TCGA-E2-A10C-01 | TCGA-LL-A5YN-01 |            |                  |            |                   |                    |                     |                     |

|  |  |  |  |  |  |  |                 |                 |
|--|--|--|--|--|--|--|-----------------|-----------------|
|  |  |  |  |  |  |  | TCGA-A2-A0YD-01 | TCGA-BH-A1FB-01 |
|  |  |  |  |  |  |  | TCGA-E2-A14T-01 | TCGA-E9-A1NI-01 |
|  |  |  |  |  |  |  | TCGA-BH-A0C1-01 | TCGA-A2-A25C-01 |
|  |  |  |  |  |  |  | TCGA-BH-A18T-01 | TCGA-BH-A0BQ-01 |
|  |  |  |  |  |  |  | TCGA-BH-A18F-01 | TCGA-A2-A25A-01 |
|  |  |  |  |  |  |  | TCGA-C8-A133-01 | TCGA-GM-A2DM-01 |
|  |  |  |  |  |  |  | TCGA-AR-A1AO-01 | TCGA-A7-A26G-01 |
|  |  |  |  |  |  |  | TCGA-E2-A1B0-01 | TCGA-D8-A1JK-01 |
|  |  |  |  |  |  |  | TCGA-E2-A1B1-01 | TCGA-OL-A5RZ-01 |
|  |  |  |  |  |  |  | TCGA-AR-A1AL-01 | TCGA-EW-A1IX-01 |
|  |  |  |  |  |  |  | TCGA-E2-A1B6-01 | TCGA-E9-A1R0-01 |
|  |  |  |  |  |  |  | TCGA-A8-A08B-01 | TCGA-D8-A1J9-01 |
|  |  |  |  |  |  |  | TCGA-AN-A0FG-01 | TCGA-AR-A250-01 |
|  |  |  |  |  |  |  | TCGA-A8-A09V-01 | TCGA-A2-A0YD-01 |
|  |  |  |  |  |  |  | TCGA-A8-A0AB-01 | TCGA-A7-A3IZ-01 |
|  |  |  |  |  |  |  | TCGA-AO-A03R-01 | TCGA-A2-A25D-01 |
|  |  |  |  |  |  |  | TCGA-A8-A07G-01 | TCGA-C8-A1HE-01 |
|  |  |  |  |  |  |  | TCGA-B6-A0I5-01 | TCGA-D8-A1X7-01 |
|  |  |  |  |  |  |  | TCGA-AO-A0J4-01 | TCGA-D8-A27M-01 |
|  |  |  |  |  |  |  | TCGA-BH-A0H0-01 | TCGA-BH-A1FJ-01 |
|  |  |  |  |  |  |  | TCGA-A2-A0EN-01 | TCGA-EW-A1P1-01 |
|  |  |  |  |  |  |  | TCGA-E2-A105-01 | TCGA-C8-A1HO-01 |
|  |  |  |  |  |  |  | TCGA-B6-A0WS-01 | TCGA-BH-A0B6-01 |
|  |  |  |  |  |  |  | TCGA-BH-A18I-01 | TCGA-AC-A3W7-01 |
|  |  |  |  |  |  |  | TCGA-BH-A0DO-01 | TCGA-AR-A1AL-01 |
